# Supplementary material for: Visible-light-induced iron-catalyzed S–N cross-coupling of thiols with dioxazolones
Source: Royal Society of Chemistry journal article supplement (doi:10.1039/d3gc02479b), 2023-01-01

## Supporting Information

### Visible-light-induced Iron-catalyzed S-N Cross-coupling of Thiols with Dioxazolones

Jing-Jing Tang,<sup>†a,b</sup> Ning Yan,<sup>†a</sup> Yiwei Zhang,<sup>†a</sup> Yi Wang,<sup>a</sup> Ming Bao,<sup>a</sup> and  
Xiaoqiang Yu<sup>\*,a</sup>

<sup>a</sup>State Key Laboratory of Fine Chemicals, Dalian University of Technology, Dalian 116023, China.

<sup>b</sup>Faculty of Light Industry and Chemical Engineering, Dalian Polytechnic University, Dalian 116023, China

#### Table of Contents

|                                                             |   |
|-------------------------------------------------------------|---|
| 1. General information .....                                | 2 |
| 2. Procedure for the preparation of starting materials..... | 4 |
| 3. Procedure for optimization studies.....                  | 4 |
| 4. Experimental procedures.....                             | 5 |
| 5. Mechanistic studies .....                                | 6 |
| 6. Characterization for all compounds .....                 | 6 |

## 1. General information

All reactions were carried out under a nitrogen atmosphere. Solvents were purified by standard techniques without special instructions. All commercially available compounds were purchased from Energy Chemical, J&K, Across, Alfa, TCI or Adamas. TLC was carried out on SiO<sub>2</sub> (silica gel 60 F254, Merck), and the spots were located with UV light (254 nm). Flash chromatography was carried out on SiO<sub>2</sub> (silica gel 60, 200-300 mesh). <sup>1</sup>H and <sup>13</sup>C NMR spectra were recorded on a Bruker Avance II-400 spectrometer (400 MHz for <sup>1</sup>H, 100 MHz for <sup>13</sup>C) and a Bruker AvanceNEO 600M NMR spectrometer (600 MHz for <sup>1</sup>H, 150 MHz for <sup>13</sup>C); DMSO-*d*<sub>6</sub>, Acetone-*d*<sub>6</sub>, CD<sub>3</sub>OD, CDCl<sub>3</sub> and TMS were used as a solvent and an internal standard, respectively. The chemical shifts were reported in ppm downfield (δ) from TMS, the coupling constants *J* are given in Hz. The peak patterns were indicated as follows: s, singlet; d, doublet; t, triplet; m, multiplet; q, quartet. IR spectra were recorded on a NEXUS FT-IR spectrometer. High resolution mass spectra (HRMS) were recorded on quadrupole analyzer using an ESI source (Agilent Technologies G6224A). UV/Vis absorption spectra were obtained with Agilent 8453 UV-Vis spectrometer.

The photocatalytic reactions were performed on Xi'an WATTCAS Parallel Light Reactor (WP-TEC-1020HSL) with 450 nm 10W blue COB LED. And the temperature of the heated reactor was set to indicate temperature.

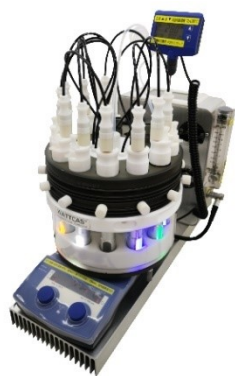

**Figure S1.** Setup for photocatalytic reactions

## CLED Test Report

**Product Mark**

Model: 450-455nm 10W  
Temperature: 20°C  
Tester: lilu

Manufacture:  
Humidity: 35%  
Test Date: 2020-07-09,11:27:03

**Parameter**

| Name                | Value         | Name                    | Value         | Name              | Value        | Name | Value |
|---------------------|---------------|-------------------------|---------------|-------------------|--------------|------|-------|
| FlickerFrequency Hz | 0.00          | CIE u',v'               | 0.1930,0.0892 | CIE1931 Y         | 569034.188   |      |       |
| FluctuateDepth(%)   | 36.2          | Duv y0,dy               | 0.0000,0.0000 | CIE1931 Z         | 15369010.000 |      |       |
| BinkPercent(%)      | 22.1          | SDCM                    | 100.00        | TLCT-2012         | 0            |      |       |
| BinkExponent        | 0.00          | Ra                      | -67.8         | Integral Time(ms) | 0            |      |       |
| EffectiveLux(lx)    | 0.0           | Ee(mW/cm <sup>2</sup> ) | 975.913       | Peak Signal       | 54611        |      |       |
| PeakLux(lx)         | 0.0           | S/P                     | 22.028        | Dark Signal       | 2072         |      |       |
| LuxIntgar(lx.s)     | 0.0           | Dominant(nm)            | 458.50        | Compensate level  | 2854         |      |       |
| FlashTime(us)       | 0             | Purity(%)               | 99.0          |                   |              |      |       |
| E(lx)               | 388650.38     | HalfWidth(nm)           | 22.2          |                   |              |      |       |
| Candle E(fc)        | 36106.50      | Peak(nm)                | 454.6         |                   |              |      |       |
| CCT(K)              | 100000        | Center(nm)              | 454.6         |                   |              |      |       |
| Duv                 | -0.06310      | Centroid(nm)            | 455.7         |                   |              |      |       |
| CIE x,y             | 0.1480,0.0304 | Color Ratio(RGB)        | 0.0,7.5,92.5  |                   |              |      |       |
| CIE u,v             | 0.1930,0.0595 | CIE1931 X               | 2769507.500   |                   |              |      |       |

**Spectrogram**

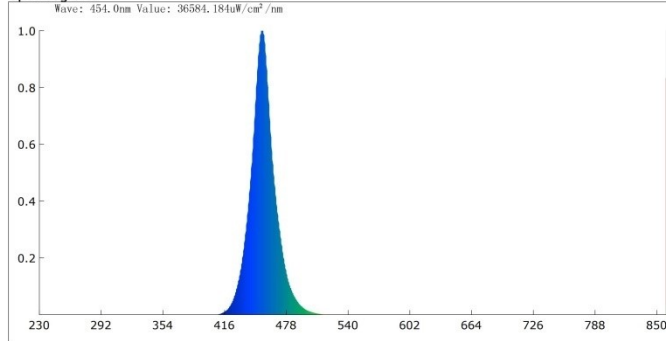

**CIE1931**

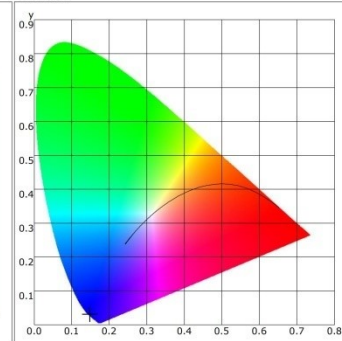

**CRI**

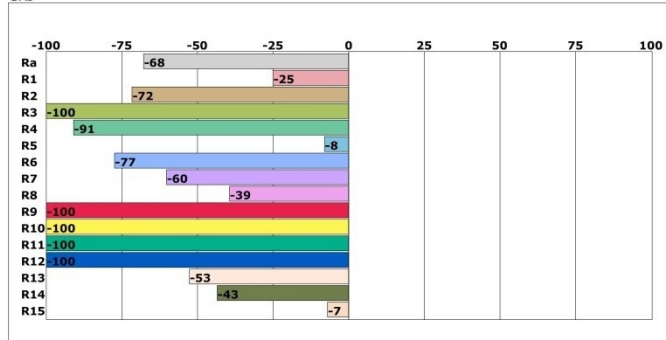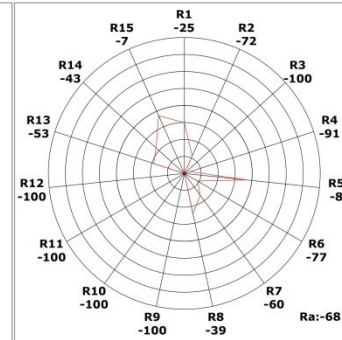

**Instrument Status**

Type: PCS230850  
Integral Time: 0.117ms

SN: 0  
VPeak: 54611

Scan Range: 230-850nm  
VDark: 2072

Remark:

- 1 -

**Figure S2. Spectrophotocolormeter analysis report**

## 2. Procedure for the preparation of starting materials

### 2.1 General procedure for the preparation of dioxazolone (**1**)<sup>[1]</sup>

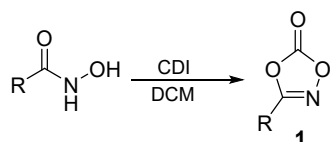

To a stirred solution of hydroxamic acid (10.0 mmol) in dichloromethane (DCM), was added 1,1'-carbonyldiimidazole (CDI 1.62 g, 10.0 mmol) at room temperature. The reaction mixture was stirred for 30 min until a high conversion of hydroxamic acid was reached (detected by TLC). Then, the reaction mixture was quenched with 1 molL<sup>-1</sup> HCl (50 mL), and the mixture was extracted with DCM, dried over MgSO<sub>4</sub> and concentrated under reduced pressure to give the dioxazolone **1**. Product was recrystallized with acetone/hexane, if necessary.

## 3. Procedure for optimization studies

**Table S1. Optimization of the catalyst, solvent and others.**

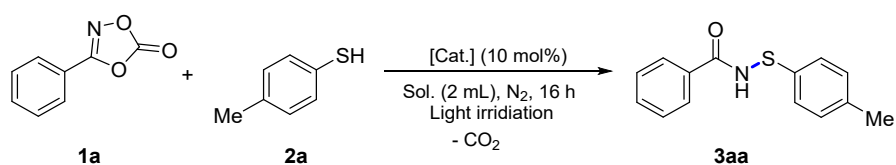

| Entry | Catalyst                             | Solvent           | Wavelength/nm | Yield[%] <sup>a</sup> |
|-------|--------------------------------------|-------------------|---------------|-----------------------|
| 1     | FeCl <sub>2</sub>                    | DCM               | 450           | 49                    |
| 2     | Fe(OAc) <sub>2</sub>                 | DCM               | 450           | 13                    |
| 3     | FeSO <sub>4</sub> ·7H <sub>2</sub> O | DCM               | 450           | 22                    |
| 4     | Fe(acac) <sub>2</sub>                | DCM               | 450           | trace                 |
| 5     | FeF <sub>3</sub>                     | DCM               | 450           | trace                 |
| 6     | Fe(OTf) <sub>3</sub>                 | DCM               | 450           | NR                    |
| 7     | FeCl <sub>3</sub>                    | DCM               | 450           | 58                    |
| 8     | FeBr <sub>3</sub>                    | DCM               | 450           | 70                    |
| 9     | FeBr <sub>2</sub>                    | DCM               | 450           | 67                    |
| 10    | FeBr <sub>3</sub>                    | Et <sub>2</sub> O | 450           | 33                    |

|                 |                   |             |     |       |
|-----------------|-------------------|-------------|-----|-------|
| 11              | FeBr <sub>3</sub> | DCE         | 450 | 59    |
| 12              | FeBr <sub>3</sub> | 1,4-Dioxane | 450 | 65    |
| 13              | FeBr <sub>3</sub> | Toluene     | 450 | trace |
| 14              | FeBr <sub>3</sub> | DMF         | 450 | NR    |
| 15              | FeBr <sub>3</sub> | MeCN        | 450 | 83    |
| 16              | FeBr <sub>3</sub> | MeCN        | 365 | trace |
| 17              | FeBr <sub>3</sub> | MeCN        | 400 | trace |
| 18              | FeBr <sub>3</sub> | MeCN        | 500 | 11    |
| 19 <sup>b</sup> | FeBr <sub>3</sub> | MeCN        | 450 | 40    |
| 20 <sup>c</sup> | FeBr <sub>3</sub> | MeCN        | --- | trace |
| 21              | ---               | MeCN        | 450 | 17    |

[a] Reaction conditions: **1a** (0.4 mmol), **2a** (0.2 mmol), Cat. (10 mol%) and Sol. (2.0 mL) at 40 °C under light irradiation for 16 h, yield of isolated product. [b] Cat. (5 mol%). [c] Without light irradiation.

## 4. Experimental procedures

### 4.1 General procedure for the S-N cross coupling of thiols with dioxazolones

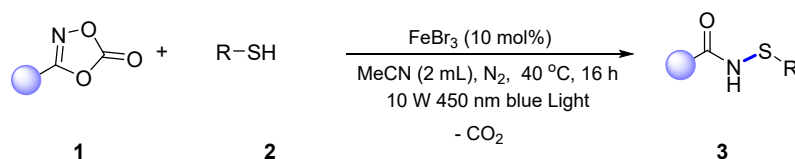

To an oven-dried 20 mL quartz tube equipped with a magnetic stir bar was added dioxazolone (0.40 mmol, 2.0 equiv.) and FeBr<sub>3</sub> (5.9 mg, 0.02 mmol, 0.10 equiv.) in the glove box under inert gas atmosphere. Then, MeCN or DCM (2.0 mL) was added followed by thiol substrate (0.2 mmol, 1.0 equiv. for liquid substrates) via syringe under a nitrogen atmosphere. The mixture was stirred and irradiated with a 10 W blue LEDs ( $\lambda_{\text{max}} = 450\text{ nm}$ ) and the temperature of the heated reactor was set to 40 °C for 16 h. After the reaction completed, the mixture was quenched with brine and washed with DCM. The combined organic layer was dried over Na<sub>2</sub>SO<sub>4</sub>, concentrated under reduced pressure. The residue was purified by silica gel flash column chromatography to give the pure desired product **3**.

## 5. Mechanistic studies

### 5.1 S-N cross-coupling of 1,2-diphenyldisulfane **4** with **1a**

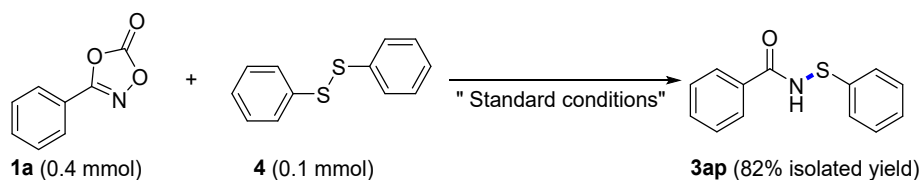

In a glovebox, the oven-dried quartz tube (20 mL) containing a stirring bar was charged with 3-phenyl-1,4,2-dioxazol-5-one (**1a**) (65.2 mg, 0.40 mmol), 1,2-diphenyldisulfane **4** (21.8 mg, 0.10 mmol), and FeBr<sub>3</sub> (5.9 mg, 0.02 mmol, 0.10 equiv.). Then, dry MeCN (2.0 mL) was injected into the tube via syringe under a nitrogen atmosphere. Subsequently, the reaction mixture was stirred under the irradiation of a 10 W blue LEDs ( $\lambda_{\text{max}} = 450 \text{ nm}$ ) at 40 °C for 16 h. After the reaction completed, the mixture was purified by column chromatography on silica gel to give the **3ap** with 82% isolated yield. This result indicates that sulfur radical is maybe a potential intermediate for S-N cross-coupling.

### 5.3 Radical capture experiment with TEMPO

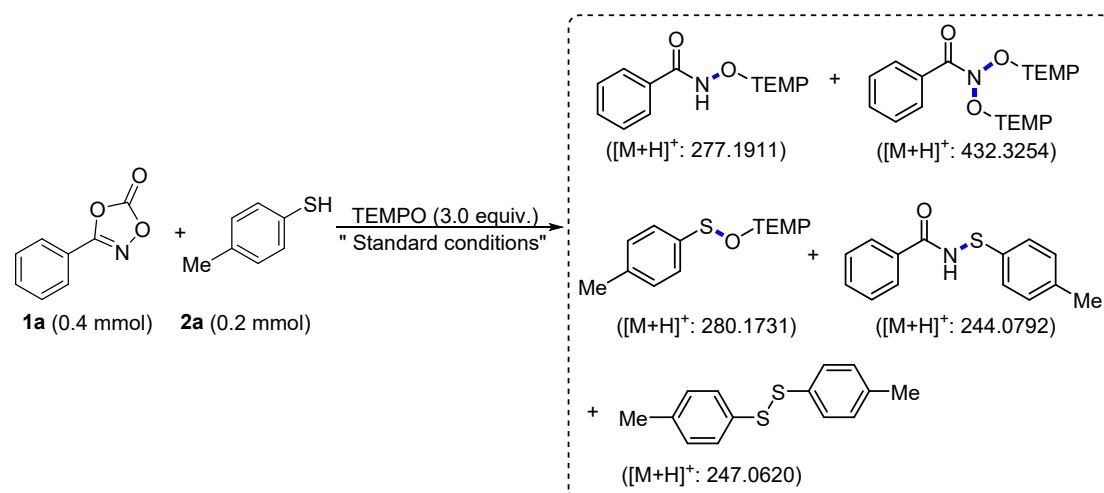

To an oven-dried 20 mL quartz tube equipped with a magnetic stir bar was added **1a** (65.2 mg, 0.40 mmol), 2,2,6,6-tetramethylpiperidine-1-oxyl (TEMPO, 93.7 mg, 0.6 mmol, 3.0 equiv.), and FeBr<sub>3</sub> (5.9 mg, 0.02 mmol, 0.10 equiv.) in the glove box under N<sub>2</sub> atmosphere. Then, dry MeCN (2.0 mL) was added followed by 4-

methylbenzenethiol (**2a**, 24.8 mg, 0.20 mmol) via syringe under a nitrogen atmosphere. Subsequently, the reaction mixture was stirred under the irradiation of a 10 W blue LEDs ( $\lambda_{\text{max}} = 450 \text{ nm}$ ) at 40 °C for 16 h. And LC-HRMS analyses revealed the presence of TEMPO-trapped acyl nitrene adducts with cluster peaks at 277.1911 and 432.3254 m/z (Figure S3). Notably, we also detected a TEMPO-trapped thiophenol adduct with a cluster peak at 280.1731 m/z through LC-HRMS analysis (Figure S3). These results suggest that the visible-light induced iron-catalyzed S-N cross coupling may occur via a radical pathway.

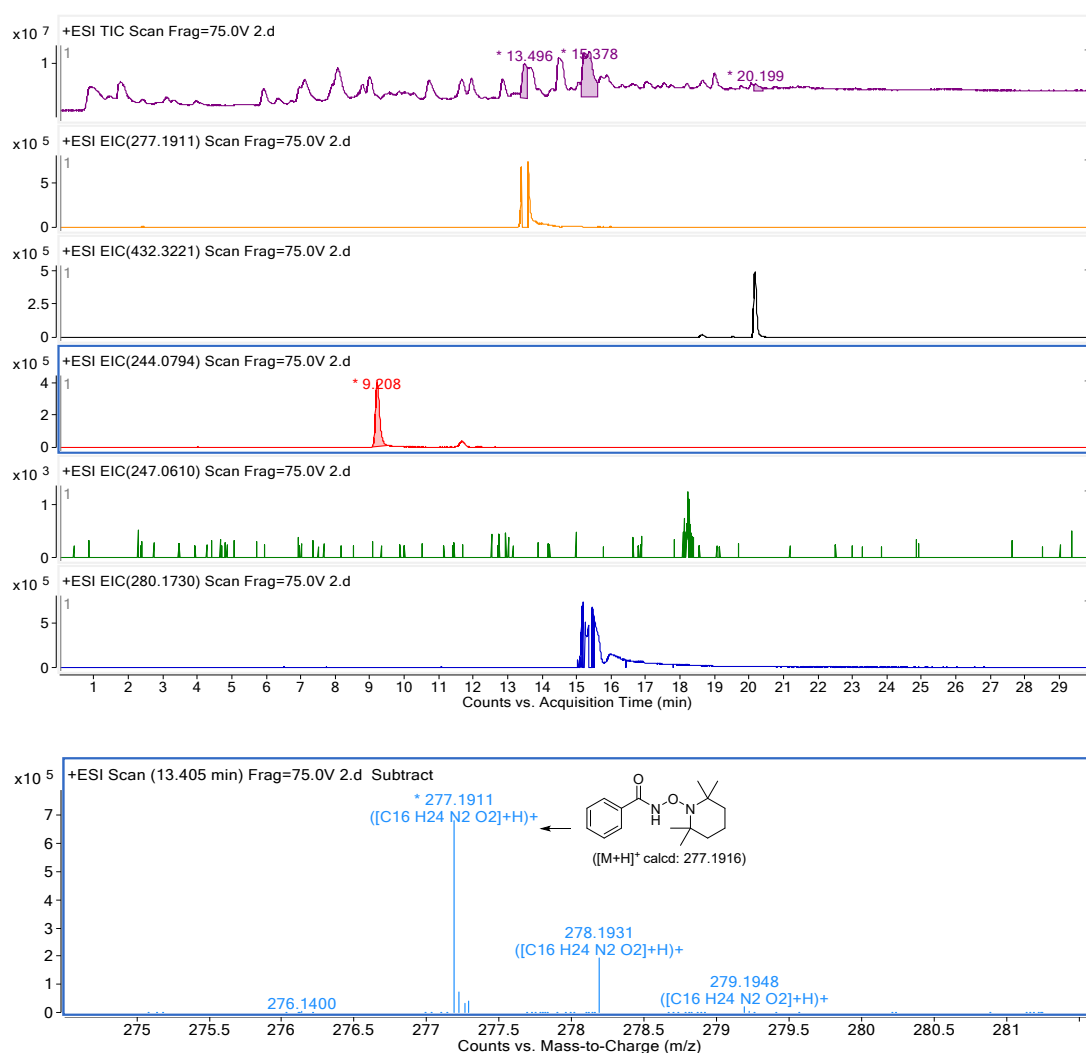

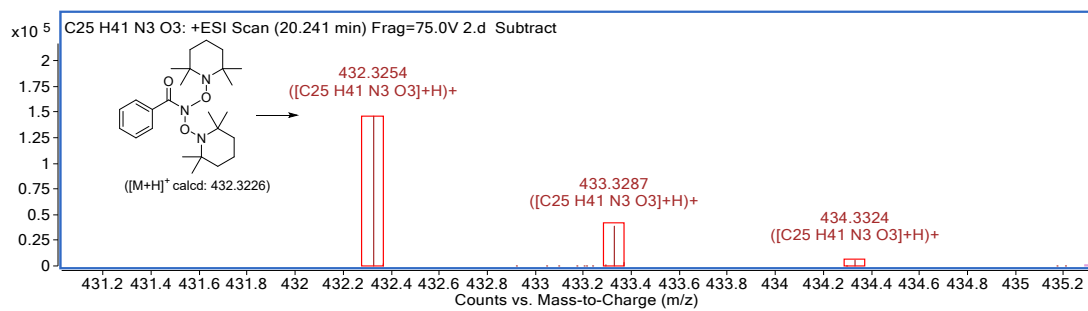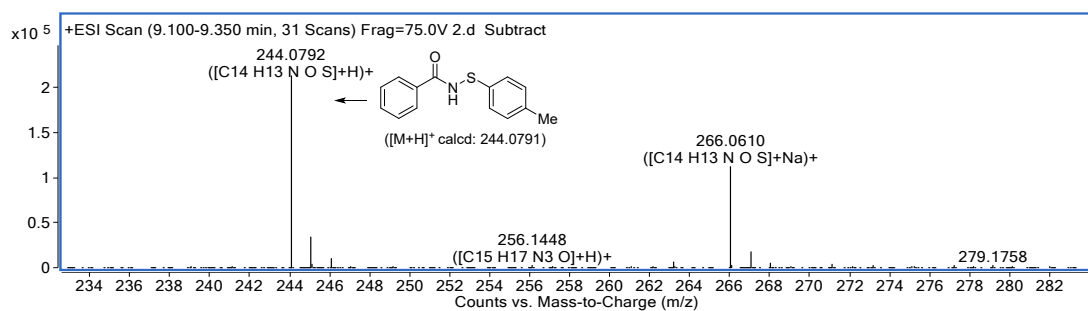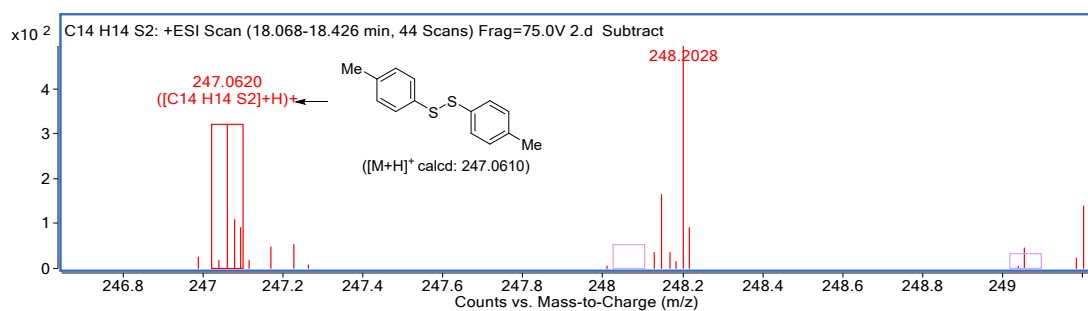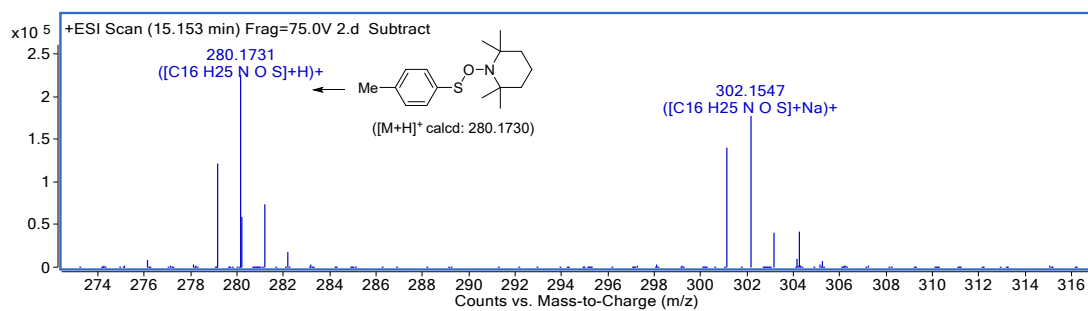

**Figure S3** LC/MS analysis of radical capture experiment for S-N cross-coupling



## 6. Characterization for all compounds

### *N*-(*p*-tolylthio)benzamide (3aa)<sup>[2]</sup>

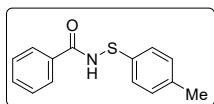

White solid (40.4 mg, 83% yield), mp 129–131 °C, (lit.<sup>2</sup> mp130–131 °C). <sup>1</sup>H NMR (DMSO-*d*<sub>6</sub>, 400 MHz) δ 10.17 (s, 1H), 7.95 (d, *J* = 7.4 Hz, 2H), 7.61–7.57 (m, 1H), 7.52–7.49 (m, 2H), 7.15 (s, 4H), 2.24 (s, 3H); <sup>13</sup>C NMR (DMSO-*d*<sub>6</sub>, 100 MHz) δ 168.3, 136.0, 135.5, 133.2, 132.2, 129.7, 128.6, 127.9, 124.2, 20.5.

### 4-methyl-*N*-(*p*-tolylthio)benzamide (3ba)

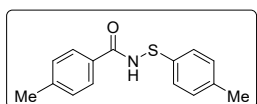

White solid (36.0 mg, 70% yield), mp 132–134 °C. <sup>1</sup>H NMR (Acetone-*d*<sub>6</sub>, 400 MHz) δ 9.19 (s, 1H), 7.91 (d, *J* = 8.2 Hz, 2H), 7.30 (d, *J* = 8.2 Hz, 2H), 7.25–7.23 (m, 2H), 7.14 (d, *J* = 8.3 Hz, 2H), 2.39 (s, 3H), 2.27 (s, 3H); <sup>13</sup>C NMR (Acetone-*d*<sub>6</sub>, 100 MHz) δ 169.0, 143.5, 137.5, 137.2, 132.0, 130.5, 130.1, 128.8, 126.4, 21.5, 21.0; IR (KBr): 3252, 2920, 1659, 1491, 1434, 1397, 1263, 1189, 1100, 1017, 801, 751 (cm<sup>-1</sup>); HRMS (ESI): ([M+H]<sup>+</sup>) calcd for C<sub>15</sub>H<sub>16</sub>NOS<sup>+</sup>: 258.0947; found: 258.0951.

### 4-(*tert*-butyl)-*N*-(*p*-tolylthio)benzamide (3ca)

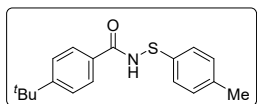

White solid (46.7 mg, 78% yield), mp 160–162 °C. <sup>1</sup>H NMR (CDCl<sub>3</sub>, 400 MHz) δ 7.78 (d, *J* = 8.4 Hz, 2H), 7.45–7.43 (m, 3H), 7.30 (d, *J* = 8.2 Hz, 2H), 7.10 (d, *J* = 7.9 Hz, 2H), 2.31 (s, 3H), 1.33 (s, 9H); <sup>13</sup>C NMR (CDCl<sub>3</sub>, 100 MHz) δ 169.0, 156.1, 137.6, 135.3, 130.6, 129.9, 127.6, 127.3, 125.8, 35.2, 31.2, 21.2; IR (KBr): 3278, 2962, 1655, 1492, 1432, 1400, 1364, 1261, 1118, 1095, 1030, 801 (cm<sup>-1</sup>); HRMS (ESI): ([M-H]<sup>-</sup>) calcd for C<sub>18</sub>H<sub>20</sub>NOS<sup>-</sup>: 298.1271; found: 298.1274.

#### **4-methoxy-N-(p-tolylthio)benzamide (3da)**

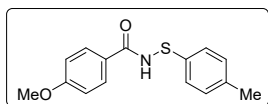

White solid (44.8 mg, 82% yield), mp 144–146 °C. <sup>1</sup>H NMR (Acetone-*d*<sub>6</sub>, 400 MHz) δ 9.12 (s, 1H), 8.01–7.98 (m, 2H), 7.23 (d, *J* = 8.2 Hz, 2H), 7.14 (d, *J* = 8.0 Hz, 2H), 7.04–7.00 (m, 2H), 3.87 (s, 3H), 2.27 (s, 3H); <sup>13</sup>C NMR (Acetone-*d*<sub>6</sub>, 100 MHz) δ 168.5, 163.8, 137.6, 137.1, 130.8, 130.5, 126.9, 126.3, 114.7, 56.0, 21.0; IR (KBr): (cm<sup>-1</sup>) 3287, 2919, 1655, 1605, 1515, 1433, 1405, 1176, 1097, 1029, 802, 606; HRMS (ESI): ([M-H]<sup>-</sup>) calcd for C<sub>15</sub>H<sub>14</sub>NO<sub>2</sub>S<sup>-</sup>: 272.0751; found: 272.0753.

#### **4-methoxy-N-(p-tolylthio)benzamide (3ea)**

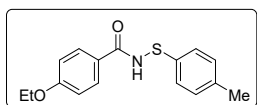

White solid (46.0 mg, 80% yield), mp 138–139 °C. <sup>1</sup>H NMR (CDCl<sub>3</sub>, 400 MHz) δ 7.82–7.78 (m, 2H), 7.50 (s, 1H), 7.27 (d, *J* = 8.3 Hz, 2H), 7.08 (d, *J* = 8.0 Hz, 2H), 6.89–6.85 (m, 2H), 4.05 (q, *J* = 7.0 Hz, 2H), 2.29 (s, 3H), 1.42 (t, *J* = 7.0 Hz, 3H); <sup>13</sup>C NMR (CDCl<sub>3</sub>, 100 MHz) δ 168.6, 162.4, 137.4, 135.4, 129.9, 129.7, 127.1, 125.4, 114.5, 63.8, 21.2, 14.8; IR (KBr): 3252, 2923, 1655, 1605, 1436, 1396, 1248, 1177, 1100, 1043, 802, 627 (cm<sup>-1</sup>); HRMS (ESI): ([M-H]<sup>-</sup>) calcd for C<sub>16</sub>H<sub>16</sub>NO<sub>2</sub>S<sup>-</sup>: 286.0907; found: 286.0913.

#### **N-(p-tolylthio)-4-(trifluoromethyl)benzamide (3fa)**

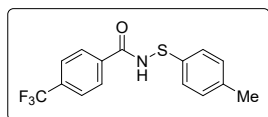

White solid (26.1 mg, 42% yield), mp 169–170 °C. <sup>1</sup>H NMR (DMSO-*d*<sub>6</sub>, 400 MHz) δ 10.4 (s, 1H), 8.14 (d, *J* = 8.1 Hz, 2H), 7.91 (d, *J* = 8.1 Hz, 2H), 7.21–7.16 (m, 4H), 2.27 (s, 3H); <sup>13</sup>C NMR(DMSO-*d*<sub>6</sub>, 100 MHz) δ 167.4, 137.0, 135.8, 135.5, 131.9 (q, *J*<sub>C-F</sub> = 32.1 Hz), 129.7, 128.8, 125.6 (q, *J*<sub>C-F</sub> = 3.8 Hz), 124.6, 123.8 (q, *J*<sub>C-F</sub> = 272.6 Hz), 20.5; IR (KBr): 3424, 3273, 1665, 1428, 1330, 1163, 1128, 1051, 1027, 1006, 805, 622 (cm<sup>-1</sup>); HRMS (ESI): ([M-H]<sup>-</sup>) calcd for C<sub>15</sub>H<sub>11</sub>F<sub>3</sub>NOS<sup>-</sup>: 310.0519; found: 310.0521.

#### 4-fluoro-N-(p-tolylthio)benzamide (3ga)

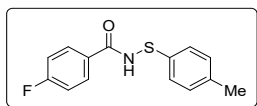

Yellow solid (44.4 mg, 85% yield), mp 162–163 °C.  $^1\text{H}$  NMR (DMSO- $d_6$ , 400 MHz)  $\delta$  10.19 (s, 1H), 8.05–8.01 (m, 2H), 7.37–7.32 (m, 2H), 7.16 (s, 4H), 2.25 (s, 3H);  $^{13}\text{C}$  NMR (DMSO- $d_6$ , 100 MHz)  $\delta$  167.3, 164.4 (d,  $J_{\text{C-F}} = 250.0$  Hz), 135.9, 135.6, 130.7 (d,  $J_{\text{C-F}} = 9.2$  Hz), 129.7, 129.6, 124.3, 115.6 (d,  $J_{\text{C-F}} = 21.9$  Hz), 20.5; IR (KBr): 3435, 2973, 1676, 1443, 1258, 1232, 1054, 1027, 1008, 822, 762, 597 ( $\text{cm}^{-1}$ ); HRMS (ESI): ( $[\text{M-H}]^-$ ) calcd for  $\text{C}_{14}\text{H}_{11}\text{FNOS}^-$ : 260.0051; found: 260.0054.

#### 4-chloro-N-(p-tolylthio)benzamide (3ha)

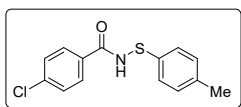

White solid (40.6 mg, 73% yield), mp 166–168 °C.  $^1\text{H}$  NMR (DMSO- $d_6$ , 400 MHz)  $\delta$  10.24 (s, 1H), 7.96 (d,  $J = 8.6$  Hz, 2H), 7.59 (d,  $J = 8.6$  Hz, 2H), 7.18–7.14 (m, 4H), 2.26 (s, 3H);  $^{13}\text{C}$  NMR (DMSO- $d_6$ , 100 MHz)  $\delta$  167.4, 137.1, 135.8, 135.7, 131.9, 129.8, 129.7, 128.7, 124.4, 20.5; IR (KBr): 3258, 2919, 1661, 1591, 1491, 1426, 1261, 1091, 1012, 846, 803, 756 ( $\text{cm}^{-1}$ ); HRMS (ESI): ( $[\text{M+H}]^+$ ) calcd for  $\text{C}_{14}\text{H}_{13}\text{ClNOS}^+$ : 278.0401; found: 278.0388.

#### 4-bromo-N-(p-tolylthio)benzamide (3ia)

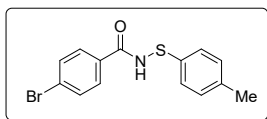

White solid (47.0 mg, 73% yield), mp 154–156 °C.  $^1\text{H}$  NMR (DMSO- $d_6$ , 600 MHz)  $\delta$  10.26 (s, 1H), 7.87 (d,  $J = 8.2$  Hz, 2H), 7.73 (d,  $J = 8.4$  Hz, 2H), 7.16–7.13 (m, 4H), 2.24 (s, 3H);  $^{13}\text{C}$  NMR (DMSO- $d_6$ , 150 MHz)  $\delta$  167.5, 135.8, 135.7, 132.3, 131.7, 130.0, 129.7, 126.2, 124.4, 20.6; IR (KBr): 3268, 1667, 1588, 1491, 1438, 1262, 1117, 1068, 1009, 802, 754, 643 ( $\text{cm}^{-1}$ ); HRMS (ESI): ( $[\text{M+H}]^+$ ) calcd for  $\text{C}_{14}\text{H}_{13}\text{BrNOS}^+$ : 321.9896; found: 321.9896.

#### 3-methyl-N-(p-tolylthio)benzamide (3ja)

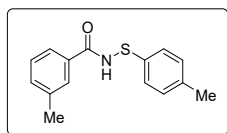

Colorless viscous oil (23.2 mg, 45% yield).  $^1\text{H}$  NMR ( $\text{CDCl}_3$ , 400 MHz)  $\delta$  7.65 (s, 1H), 7.60 (d,  $J = 7.2$  Hz, 1H), 7.49 (s, 1H), 7.35–7.32 (m, 2H), 7.30 (d,  $J = 7.8$  Hz, 2H), 7.10 (d,  $J = 8.0$  Hz, 2H), 2.37 (s, 3H), 2.31 (s, 3H);  $^{13}\text{C}$  NMR ( $\text{CDCl}_3$ , 150 MHz)  $\delta$  169.4, 138.8, 137.6, 135.1, 133.4, 133.2, 129.9, 128.7, 128.4, 127.4, 124.6, 21.4, 21.2.; IR (KBr): 3252, 2921, 1660, 1491, 1432, 1270, 1195, 1082, 921, 801, 774, 689 ( $\text{cm}^{-1}$ ); HRMS (ESI): ( $[\text{M}+\text{H}]^+$ ) calcd for  $\text{C}_{15}\text{H}_{16}\text{NOS}^+$ : 258.0947; found: 258.0957.

### *N*-(*p*-tolylthio)-3-(trifluoromethyl)benzamide (3ka)

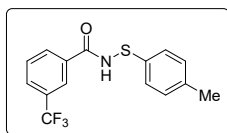

Yellow solid (39.8 mg, 64% yield), mp 100–102 °C.  $^1\text{H}$  NMR (Acetone- $d_6$ , 400 MHz)  $\delta$  9.53 (s, 1H), 8.31–8.27 (m, 2H), 7.94 (d,  $J = 7.8$  Hz, 1H), 7.79–7.75 (m, 1H), 7.29 (d,  $J = 8.2$  Hz, 2H), 7.16 (d,  $J = 8.2$  Hz, 2H), 2.28 (s, 3H);  $^{13}\text{C}$  NMR (Acetone- $d_6$ , 100 MHz)  $\delta$  168.0, 137.7, 136.7, 135.7, 132.7, 131.3 (q,  $J_{\text{C-F}} = 32.2$  Hz), 130.7, 130.6, 129.5 (q,  $J_{\text{C-F}} = 3.8$  Hz), 127.0, 125.5 (q,  $J_{\text{C-F}} = 3.9$  Hz), 125.0 (q,  $J_{\text{C-F}} = 271.8$  Hz), 21.1; IR (KBr): 3243, 2924, 1665, 1492, 1420, 1331, 1251, 1169, 1130, 1073, 802, 696 ( $\text{cm}^{-1}$ ); HRMS (ESI): ( $[\text{M}+\text{H}]^+$ ) calcd for  $\text{C}_{15}\text{H}_{13}\text{F}_3\text{NOS}^+$ : 312.0664; found: 312.0663.

### 3-fluoro-*N*-(*p*-tolylthio)benzamide (3la)

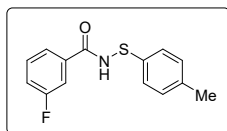

Yellow solid (24.0 mg, 46% yield), mp 106–108 °C.  $^1\text{H}$  NMR (DMSO- $d_6$ , 600 MHz)  $\delta$  10.25 (s, 1H), 7.79 (d,  $J = 7.6$  Hz, 1H), 7.74 (d,  $J = 9.7$  Hz, 1H), 7.58–7.55 (m, 1H), 7.47–7.44 (m, 1H), 7.16 (s, 4H), 2.25 (s, 3H);  $^{13}\text{C}$  NMR (DMSO- $d_6$ , 150 MHz)  $\delta$  167.1, 161.9 (d,  $J_{\text{C-F}} = 244.8$  Hz), 135.7 (d,  $J_{\text{C-F}} = 14.1$  Hz), 135.4 (d,  $J_{\text{C-F}} = 6.6$  Hz),

130.8 (d,  $J_{C-F} = 7.7$  Hz), 129.7, 124.5, 124.1 (d,  $J_{C-F} = 2.9$  Hz), 119.2 (d,  $J_{C-F} = 21.0$  Hz), 114.7 (d,  $J_{C-F} = 23.1$  Hz), 20.5; IR (KBr): 3251, 2922, 1663, 1588, 1492, 1456, 1268, 1204, 1091, 931, 802, 680 ( $\text{cm}^{-1}$ ); HRMS (ESI): ( $[\text{M}+\text{H}]^+$ ) calcd for  $\text{C}_{14}\text{H}_{13}\text{FNOS}^+$ : 262.0696; found: 262.0701.

### 2-fluoro-N-(p-tolylthio)benzamide (3ma)

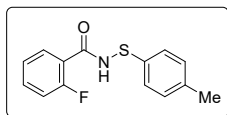

White solid (43.4 mg, 83% yield), mp 85–87 °C.  $^1\text{H}$  NMR ( $\text{DMSO-}d_6$ , 400 MHz)  $\delta$  10.13 (s, 1H), 7.66–7.56 (m, 2H), 7.36–7.29 (m, 2H), 7.22–7.17 (m, 4H), 2.27 (s, 3H);  $^{13}\text{C}$  NMR ( $\text{DMSO-}d_6$ , 100 MHz)  $\delta$  166.3, 159.1 (d,  $J_{C-F} = 250.4$  Hz), 135.7 (d,  $J_{C-F} = 9.6$  Hz), 133.1 (d,  $J_{C-F} = 8.7$  Hz), 130.0 (d,  $J_{C-F} = 2.8$  Hz), 129.7, 124.7 (d,  $J_{C-F} = 3.3$  Hz), 124.3, 123.4 (d,  $J_{C-F} = 14.7$  Hz), 116.3 (d,  $J_{C-F} = 21.7$  Hz), 20.6; IR (KBr): 3208, 2973, 1672, 1612, 1455, 1279, 1220, 1116, 1085, 1024, 801, 753 ( $\text{cm}^{-1}$ ); HRMS (ESI): ( $[\text{M}+\text{H}]^+$ ) calcd for  $\text{C}_{14}\text{H}_{13}\text{FNOS}^+$ : 262.0696; found: 262.0706.

### 3,5-dimethyl-N-(p-tolylthio)benzamide (3na)

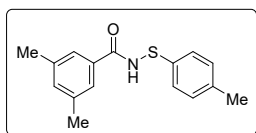

Colorless viscous oil (46.1 mg, 85% yield).  $^1\text{H}$  NMR ( $\text{CDCl}_3$ , 400 MHz)  $\delta$  7.52 (s, 1H), 7.43 (s, 2H), 7.28 (d,  $J = 8.2$  Hz, 2H), 7.15 (s, 1H), 7.08 (d,  $J = 8.0$  Hz, 2H), 2.33 (s, 6H), 2.30 (s, 3H);  $^{13}\text{C}$  NMR ( $\text{CDCl}_3$ , 100 MHz)  $\delta$  169.5, 138.6, 137.5, 135.2, 134.0, 133.4, 129.8, 127.2, 125.4, 21.3, 21.2; IR (KBr): 3242, 2920, 1659, 1605, 1452, 1405, 1302, 1220, 1117, 867, 802, 685 ( $\text{cm}^{-1}$ ); HRMS (ESI): ( $[\text{M}-\text{H}]^-$ ) calcd for  $\text{C}_{16}\text{H}_{16}\text{NOS}^-$ : 270.0958; found: 270.0960.

### N-(p-tolylthio)thiophene-2-carboxamide (3oa)

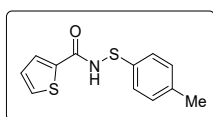

Brown solid (18.0 mg, 36% yield), mp 127–129 °C. <sup>1</sup>H NMR (DMSO-*d*<sub>6</sub>, 400 MHz) δ 10.18 (s, 1H), 8.00 (dd, *J* = 3.8, 1.0 Hz, 1H), 7.89 (dd, *J* = 5.0, 1.0 Hz, 1H), 7.21 (dd, *J* = 5.0, 3.8 Hz, 1H), 7.16 (s, 4H), 2.25 (s, 3H); <sup>13</sup>C NMR (DMSO-*d*<sub>6</sub>, 100 MHz) δ 162.9, 137.9, 135.9, 135.8, 132.7, 130.2, 129.6, 128.2, 124.5, 20.5. IR (KBr): 3250, 2921, 1648, 1521, 1492, 1436, 1267, 1093, 1040, 863, 720, 656 (cm<sup>-1</sup>); HRMS (ESI): ([M-H]<sup>-</sup>) calcd for C<sub>12</sub>H<sub>10</sub>NOS<sub>2</sub>: 248.0209; found: 248.0210.

### *N*-(*p*-tolylthio)thiophene-2-carboxamide (3pa)

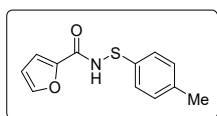

Colorless viscous oil (27.1 mg, 58% yield). <sup>1</sup>H NMR (DMSO-*d*<sub>6</sub>, 400 MHz) δ 10.09 (s, 1H), 7.94 (d, *J* = 1.0 Hz, 1H), 7.38 (d, *J* = 3.5 Hz, 1H), 7.18–7.13 (m, 4H), 6.69 (dd, *J* = 3.5, 1.7 Hz, 1H), 2.26 (s, 3H); <sup>13</sup>C NMR (DMSO-*d*<sub>6</sub>, 100 MHz) δ 159.3, 146.5, 146.4, 135.9, 135.7, 129.6, 124.5, 115.7, 112.1, 20.5. IR (KBr): 3225, 2920, 1664, 1471, 1416, 1275, 1165, 1113, 1013, 933, 801, 758 (cm<sup>-1</sup>); HRMS (ESI): ([M-H]<sup>-</sup>) calcd for C<sub>12</sub>H<sub>10</sub>NO<sub>2</sub>S: 232.0438; found: 232.0428.

### *N*-(*p*-tolylthio)-2-naphthamide (3qa)

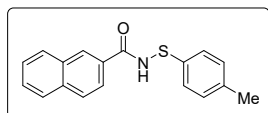

Yellow solid (45.2 mg, 77% yield), mp 125–127 °C. <sup>1</sup>H NMR (DMSO-*d*<sub>6</sub>, 400 MHz) δ 10.32 (s, 1H), 8.60 (s, 1H), 8.07–8.05 (m, 2H), 8.01–7.98 (m, 2H), 7.67–7.60 (m, 2H), 7.21–7.16 (m, 4H), 2.26 (s, 3H); <sup>13</sup>C NMR (DMSO-*d*<sub>6</sub>, 100 MHz) δ 168.5, 136.0, 135.6, 134.5, 132.1, 130.5, 129.7, 129.1, 128.7, 128.21, 128.16, 127.7, 127.0, 124.38, 124.35, 20.6. IR (KBr): (cm<sup>-1</sup>) 3223, 2922, 1664, 1412, 1384, 1248, 1193, 1135, 1087, 1027, 803, 784; HRMS (ESI): ([M-H]<sup>-</sup>) calcd for C<sub>18</sub>H<sub>14</sub>NOS: 292.0802; found: 292.0804.

### *N*-(*p*-tolylthio)octanamide (3ra)

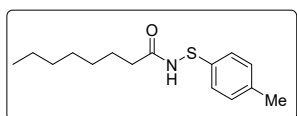

White solid (40.3 mg, 76% yield), mp 79–80 °C.  $^1\text{H}$  NMR ( $\text{CD}_3\text{OD}$ , 400 MHz)  $\delta$  7.19–7.12 (m, 4H), 2.35 (t,  $J = 7.4$  Hz, 2H), 2.30 (s, 3H), 1.67–1.62 (m, 2H), 1.30 (s, 8H), 0.90 (t,  $J = 6.6$  Hz, 3H);  $^{13}\text{C}$  NMR ( $\text{CD}_3\text{OD}$ , 100 MHz)  $\delta$  177.1, 136.7, 135.5, 129.3, 125.9, 35.8, 31.5, 28.8, 28.7, 25.5, 22.3, 19.7, 13.1. IR (KBr): ( $\text{cm}^{-1}$ ) 3242, 2924, 2852, 1672, 1468, 1451, 1410, 1225, 1173, 1118, 804, 708; HRMS (ESI): ( $[\text{M}+\text{H}]^+$ ) calcd for  $\text{C}_{15}\text{H}_{24}\text{NOS}^+$ : 266.1573; found: 266.1569.

***N*-[4-(*tert*-butyl)-phenylthio]benzamide (3ab)**

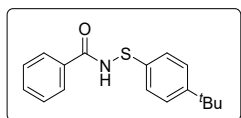

White solid (40.5 mg, 71% yield), mp 137–139 °C.  $^1\text{H}$  NMR ( $\text{DMSO}-d_6$ , 400 MHz)  $\delta$  10.17 (s, 1H), 7.95 (d,  $J = 7.3$  Hz, 2H), 7.62–7.58 (m, 1H), 7.53–7.49 (m, 2H), 7.36 (d,  $J = 8.5$  Hz, 2H), 7.18 (d,  $J = 8.5$  Hz, 2H), 1.23 (s, 9H);  $^{13}\text{C}$  NMR ( $\text{DMSO}-d_6$ , 100 MHz)  $\delta$  168.4, 148.8, 136.1, 133.2, 132.2, 128.6, 127.9, 125.9, 124.0, 34.2, 31.0; IR (KBr): 3192, 2962, 1679, 1498, 1452, 1426, 1262, 1050, 1026, 1010, 820, 702 ( $\text{cm}^{-1}$ ); HRMS (ESI): ( $[\text{M}-\text{H}]^-$ ) calcd for  $\text{C}_{17}\text{H}_{18}\text{NOS}^-$ : 284.1115; found: 284.1113.

***N*-[4-(*tert*-butyl)-phenylthio]benzamide (3ac)**

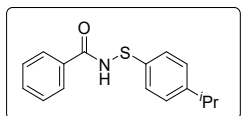

White solid (39.6 mg, 73% yield), mp 108–110 °C.  $^1\text{H}$  NMR ( $\text{DMSO}-d_6$ , 400 MHz)  $\delta$  10.17 (s, 1H), 7.96 (d,  $J = 7.5$  Hz, 2H), 7.63–7.59 (m, 1H), 7.54–7.50 (m, 2H), 7.24–7.17 (m, 4H), 2.89–2.79 (m, 1H), 1.16 (d,  $J = 6.9$  Hz, 6H);  $^{13}\text{C}$  NMR ( $\text{DMSO}-d_6$ , 100 MHz)  $\delta$  168.4, 146.6, 136.4, 133.2, 132.2, 128.6, 127.9, 127.1, 124.3, 33.0, 23.8; IR (KBr): 3260, 2960, 1660, 1494, 1451, 1420, 1261, 1098, 1027, 819, 709, 692 ( $\text{cm}^{-1}$ ); HRMS (ESI): ( $[\text{M}-\text{H}]^-$ ) calcd for  $\text{C}_{16}\text{H}_{16}\text{NOS}^-$ : 270.0958; found: 270.0957.

***N*-[4-nitrophenylthio]benzamide (3ad)**

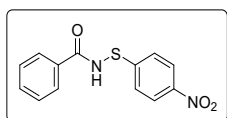

Yellow solid (38.4 mg, 70% yield), mp 154–156 °C, (lit.<sup>2</sup> mp 157–158 °C). <sup>1</sup>H NMR (DMSO-*d*<sub>6</sub>, 400 MHz) δ 10.41 (s, 1H), 8.18 (d, *J* = 7.2 Hz, 2H), 8.00 (d, *J* = 5.6 Hz, 2H), 7.64–7.55 (m, 3H), 7.41 (d, *J* = 7.3 Hz, 2H); <sup>13</sup>C NMR (DMSO-*d*<sub>6</sub>, 100 MHz) δ 168.2, 149.7, 145.0, 132.6, 132.6, 128.7, 128.1, 124.2, 122.4; IR (KBr): 3250, 2923, 1663, 1580, 1514, 1451, 1417, 1338, 1257, 1087, 853, 711 (cm<sup>-1</sup>); HRMS (ESI): ([M+H]<sup>+</sup>) calcd for C<sub>13</sub>H<sub>11</sub>N<sub>2</sub>O<sub>3</sub>S<sup>+</sup>: 275.0485; found: 275.0487.

***N*-[(4-fluorophenyl)thio]benzamide (3ae)**<sup>[4]</sup>

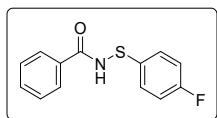

White solid (39.1 mg, 79% yield), mp 120–122 °C. <sup>1</sup>H NMR (DMSO-*d*<sub>6</sub>, 400 MHz) δ 10.23 (s, 1H), 7.95 (d, *J* = 7.3 Hz, 2H), 7.63–7.59 (m, 1H), 7.54–7.50 (m, 2H), 7.33–7.30 (m, 2H), 7.23–7.19 (m, 2H); <sup>13</sup>C NMR (DMSO-*d*<sub>6</sub>, 100 MHz) δ 168.3, 160.8 (d, *J*<sub>C-F</sub> = 243.3 Hz), 135.0 (d, *J*<sub>C-F</sub> = 3.0 Hz), 133.0, 132.3, 128.6, 127.9, 126.5 (d, *J*<sub>C-F</sub> = 8.3 Hz), 116.1 (d, *J*<sub>C-F</sub> = 22.2 Hz); IR (KBr): 3235, 2925, 1660, 1589, 1490, 1452, 1418, 1260, 1227, 1096, 822, 692 (cm<sup>-1</sup>); HRMS (ESI): ([M-H]<sup>-</sup>) calcd for C<sub>13</sub>H<sub>9</sub>FNOS<sup>-</sup>: 246.0394; found: 246.0395.

***N*-[(4-chlorophenyl)thio]benzamide (3af)**<sup>[2]</sup>

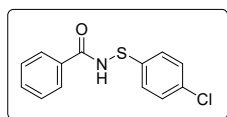

White solid (27.4 mg, 52% yield), mp 142–143 °C, (lit.<sup>2</sup> mp 143 °C). <sup>1</sup>H NMR (CDCl<sub>3</sub>, 400 MHz) δ 7.84 (d, *J* = 7.6 Hz, 2H), 7.72 (s, 1H), 7.57–7.53 (m, 1H), 7.44–7.41 (m, 2H), 7.23 (s, 4H); <sup>13</sup>C NMR (CDCl<sub>3</sub>, 100 MHz) δ 169.3, 137.2, 133.1, 133.1, 132.7, 129.3, 128.9, 127.8, 127.3.

***N*-[(4-bromophenyl)thio]benzamide (3ag)**<sup>[4]</sup>

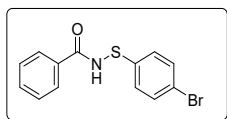

White solid (50.5 mg, 82% yield), mp 146–148 °C. <sup>1</sup>H NMR (DMSO-*d*<sub>6</sub>, 400 MHz) δ 10.26 (s, 1H), 7.98–7.96 (m, 2H), 7.64–7.60 (m, 1H), 7.55–7.51 (m, 4H), 7.19–7.16



(m, 2H);  $^{13}\text{C}$  NMR (DMSO- $d_6$ , 100 MHz)  $\delta$  168.3, 139.3, 132.9, 132.4, 131.8, 128.6, 128.0, 125.2, 118.5; IR (KBr): 3227, 2921, 1660, 1471, 1451, 1418, 1259, 1085, 1026, 1006, 808, 693 ( $\text{cm}^{-1}$ ); HRMS (ESI): ( $[\text{M}-\text{H}]^-$ ) calcd for  $\text{C}_{13}\text{H}_9\text{BrNOS}^-$ : 305.9594; found: 305.9584.

***N*-(*m*-tolylthio)benzamide (3ah)**<sup>[5]</sup>

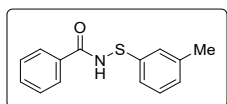

White solid (37.0 mg, 76% yield), mp 82–84 °C.  $^1\text{H}$  NMR (Acetone- $d_6$ , 400 MHz)  $\delta$  9.25 (s, 1H), 8.03 (d,  $J = 7.5$  Hz, 2H), 7.63–7.59 (m, 1H), 7.54–7.50 (m, 2H), 7.23–7.19 (m, 1H), 7.13–7.09 (m, 2H), 7.00 (d,  $J = 7.5$  Hz, 1H), 2.28 (s, 3H);  $^{13}\text{C}$  NMR (Acetone- $d_6$ , 100 MHz)  $\delta$  169.2, 140.8, 139.6, 134.8, 133.1, 129.8, 129.5, 128.8, 127.9, 125.6, 122.3, 21.4; IR (KBr): 3253, 2923, 1661, 1580, 1452, 1421, 1261, 1098, 1073, 1027, 771, 690 ( $\text{cm}^{-1}$ ); HRMS (ESI): ( $[\text{M}-\text{H}]^-$ ) calcd for  $\text{C}_{14}\text{H}_{12}\text{NOS}^-$ : 242.0645; found: 242.0641.

***N*-(*o*-tolylthio)benzamide (3ai)**<sup>[4]</sup>

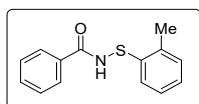

Yellow solid (39.9 mg, 82% yield), mp 68–70 °C.  $^1\text{H}$  NMR (DMSO- $d_6$ , 400 MHz)  $\delta$  10.09 (s, 1H), 7.99 (d,  $J = 7.3$  Hz, 2H), 7.64–7.60 (m, 1H), 7.55–7.52 (m, 2H), 7.20–7.16 (m, 2H), 7.10–7.03 (m, 2H), 2.29 (s, 3H);  $^{13}\text{C}$  NMR (DMSO- $d_6$ , 100 MHz)  $\delta$  168.4, 137.9, 133.1, 132.3, 131.9, 130.1, 128.6, 128.0, 126.6, 125.3, 122.3, 18.4; IR (KBr): 3251, 2974, 1659, 1579, 1452, 1420, 1260, 1097, 1073, 1027, 746, 692 ( $\text{cm}^{-1}$ ); HRMS (ESI): ( $[\text{M}-\text{H}]^-$ ) calcd for  $\text{C}_{14}\text{H}_{12}\text{NOS}^-$ : 242.0645; found: 242.0647.

***N*-(2-chlorophenylthio)benzamide (3aj)**<sup>[3]</sup>

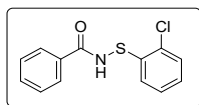

Yellow solid (46.4 mg, 88% yield), mp 129–131 °C, (lit.<sup>3</sup> mp 129–131 °C).  $^1\text{H}$  NMR ( $\text{CDCl}_3$ , 400 MHz)  $\delta$  7.88–7.86 (m, 2H), 7.82 (s, 1H), 7.54–7.50 (m, 1H), 7.40–7.36

(m, 2H), 7.26–7.24 (m, 1H), 7.16–7.04 (m, 3H);  $^{13}\text{C}$  NMR ( $\text{CDCl}_3$ , 100 MHz)  $\delta$  169.4, 137.3, 132.8, 132.7, 129.6, 128.9, 128.8, 127.9, 127.4, 127.0, 124.4.

### *N*-[(2-bromophenyl)thio]benzamide (**3ak**)

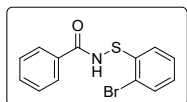

Yellow solid (49.9 mg, 81% yield), mp 147–149 °C.  $^1\text{H}$  NMR (Acetone- $d_6$ , 400 MHz)  $\delta$  9.34 (s, 1H), 8.08–8.06 (m, 2H), 7.66–7.62 (m, 1H), 7.56–7.53 (m, 3H), 7.37–7.33 (m, 1H), 7.16 (dd,  $J = 8.0, 1.4$  Hz, 1H), 7.12–7.08 (m, 1H);  $^{13}\text{C}$  NMR (Acetone- $d_6$ , 100 MHz)  $\delta$  183.3, 141.2, 134.3, 133.5, 133.3, 129.6, 129.0, 128.9, 127.6, 124.4, 116.6; IR (KBr): 3250, 2925, 1660, 1580, 1451, 1427, 1259, 1097, 1019, 865, 745, 691 ( $\text{cm}^{-1}$ ); HRMS (ESI): ( $[\text{M}+\text{H}]^+$ ) calcd for  $\text{C}_{13}\text{H}_{11}\text{BrNOS}^+$ : 307.9739; found: 307.9743.

### *N*-(naphthalen-2-ylthio)benzamide (**3al**)<sup>[5]</sup>

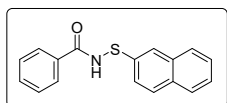

Yellow solid (35.8 mg, 64% yield), mp 152–154 °C.  $^1\text{H}$  NMR (DMSO- $d_6$ , 400 MHz)  $\delta$  10.33 (s, 1H), 8.02–8.00 (m, 2H), 7.91 (d,  $J = 8.7$  Hz, 1H), 7.85 (dd,  $J = 18.3, 7.9$  Hz, 2H), 7.70 (d,  $J = 1.4$  Hz, 1H), 7.65–7.62 (m, 1H), 7.57–7.53 (m, 2H), 7.52–7.44 (m, 2H), 7.40 (dd,  $J = 8.7, 1.9$  Hz, 1H);  $^{13}\text{C}$  NMR (DMSO- $d_6$ , 100 MHz)  $\delta$  168.4, 137.2, 133.11, 133.08, 132.3, 131.3, 128.7, 128.6, 128.0, 127.7, 127.0, 126.9, 125.7, 121.9, 120.9; IR (KBr): 3439, 2923, 1675, 1454, 1430, 1260, 1053, 1027, 1007, 822, 761, 706 ( $\text{cm}^{-1}$ ); HRMS (ESI): ( $[\text{M}+\text{H}]^+$ ) calcd for  $\text{C}_{17}\text{H}_{14}\text{NOS}^+$ : 280.0791; found: 280.0799.

### *N*-(butylthio)benzamide (**3am**)<sup>[4]</sup>

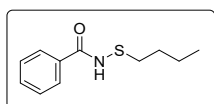

Light yellow viscous oil (26.8 mg, 64% yield).  $^1\text{H}$  NMR (DMSO- $d_6$ , 400 MHz)  $\delta$  9.42 (s, 1H), 7.85 (d,  $J = 7.3$  Hz, 2H), 7.56–7.53 (m, 1H), 7.48–7.44 (m, 2H), 2.74 (t,  $J = 7.1$  Hz, 2H), 1.55–1.48 (m, 2H), 1.43–1.34 (m, 2H), 0.85 (t,  $J = 7.3$  Hz, 3H);  $^{13}\text{C}$

NMR (DMSO-*d*<sub>6</sub>, 100 MHz)  $\delta$  169.2, 134.1, 132.2, 128.9, 128.1, 37.7, 29.9, 21.5, 14.0; IR (KBr): 3388, 3182, 2962, 1645, 1577, 1405, 1260, 1092, 1024, 796, 685, 634 (cm<sup>-1</sup>); HRMS (ESI): ([M+H]<sup>+</sup>) calcd for C<sub>11</sub>H<sub>16</sub>NOS<sup>+</sup>: 210.0947; found: 210.0950.

***N*-(phenethylthio)benzamide (3an)**

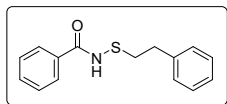

White solid (18.5 mg, 36% yield), mp 70–72 °C. <sup>1</sup>H NMR (Acetone-*d*<sub>6</sub>, 400 MHz)  $\delta$  8.67 (s, 1H), 7.95–7.93 (m, 2H), 7.59–7.55 (m, 1H), 7.50–7.46 (m, 2H), 7.27 (d, *J* = 4.3 Hz, 4H), 7.21–7.16 (m, 1H), 3.10–3.06 (m, 2H), 2.98–2.94 (m, 2H); <sup>13</sup>C NMR (Acetone-*d*<sub>6</sub>, 100 MHz)  $\delta$  169.7, 141.5, 135.3, 132.7, 129.6, 129.4, 129.3, 128.6, 127.1, 40.7, 35.5; IR (KBr): 3396, 2926, 2251, 1673, 1454, 1431, 1262, 1055, 1028, 1009, 821, 703 (cm<sup>-1</sup>); HRMS (ESI): ([M-H]<sup>-</sup>) calcd for C<sub>15</sub>H<sub>14</sub>NOS<sup>-</sup>: 256.0802; found: 256.0800.

***N*-(tritylthio)benzamide (3ao)**

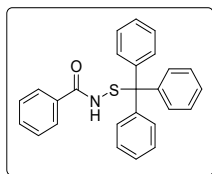

White solid (20.6 mg, 26% yield), mp 137–139 °C. <sup>1</sup>H NMR (Acetone-*d*<sub>6</sub>, 400 MHz)  $\delta$  8.15 (s, 1H), 7.92–7.90 (m, 2H), 7.53–7.49 (m, 1H), 7.45–7.40 (m, 8H), 7.32–7.28 (m, 6H), 7.25–7.21 (m, 3H); <sup>13</sup>C NMR (Acetone-*d*<sub>6</sub>, 100 MHz)  $\delta$  167.1, 146.2, 136.8, 132.1, 129.8, 129.2, 128.5, 128.3, 127.5, 71.3; IR (KBr): 3443, 3057, 1735, 1676, 1507, 1477, 1275, 1029, 766, 751, 699, 611 (cm<sup>-1</sup>); HRMS (ESI): ([M-H]<sup>-</sup>) calcd for C<sub>26</sub>H<sub>20</sub>NOS<sup>-</sup>: 394.1271; found: 394.1276.

***N*-(phenylthio)benzamide (3ap)<sup>[2]</sup>**

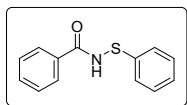

White solid (37.6 mg, 82% yield), mp 125–127 °C, (lit.<sup>2</sup> mp 123–124 °C). <sup>1</sup>H NMR (CDCl<sub>3</sub>, 400 MHz)  $\delta$  7.88 (d, *J* = 7.4 Hz, 2H), 7.66 (s, 1H), 7.59–7.55 (m, 1H), 7.47–

7.44 (m, 2H), 7.36–7.29 (m, 4H), 7.24–7.20 (m, 1H);  $^{13}\text{C}$  NMR ( $\text{CDCl}_3$ , 100 MHz)  $\delta$   
169.3, 138.7, 133.3, 132.6, 129.2, 128.9, 127.8, 127.1, 125.7.

## Reference

- [1] Bizet, V., Buglioni, L., Bolm, C. Light-Induced Ruthenium-Catalyzed Nitrene Transfer Reactions: A Photochemical Approach towards *N*-Acyl Sulfimides and Sulfoximines. *Angew. Chem. Int. Ed.* **2014**, *53*, 5639–5642.
- [2] Bao, M., Shimizu, M., Shimada, S., Tanaka M. Efficient Synthesis of *N*-acylarenesulfenamides by Acylation of Arenesulfenamides. *Tetrahedron* **2003**, *59*, 303–309.
- [3] Zhang, X. S., Zhang, X. H. Mild Synthesis of *N*-acylsulfenamides from Arylamides and Disulfides. *Phosphorus, Sulfur, and Silicon and the Related Elements*. **2016**, *191*, 89-94.
- [4] Yang, G., Yuan, Y., Tian, Y., Zhang, S., Cui, X., Xia, B., Li, G., Tang Z. Synthesis of Chiral Sulfonimidoyl Chloride via Desymmetrizing Enantioselective Hydrolysis. *J. Am. Chem. Soc.* **2023**, *145*, 5439–5446.
- [5] Chen, Y., Fang, D. Huang, H., Nie, X., Zhang, S., Cui, X., Tang, Z. Li, G. Synthesis of Sulfilimines via Selective S–C Bond Formation in Water. *Org. Lett.* **2023**, *25*, 2134–2138.

# Copies of $^1\text{H}$ and $^{13}\text{C}$ NMR spectra of products

$^1\text{H}$  NMR, 400 MHz,  $\text{DMSO}-d_6$

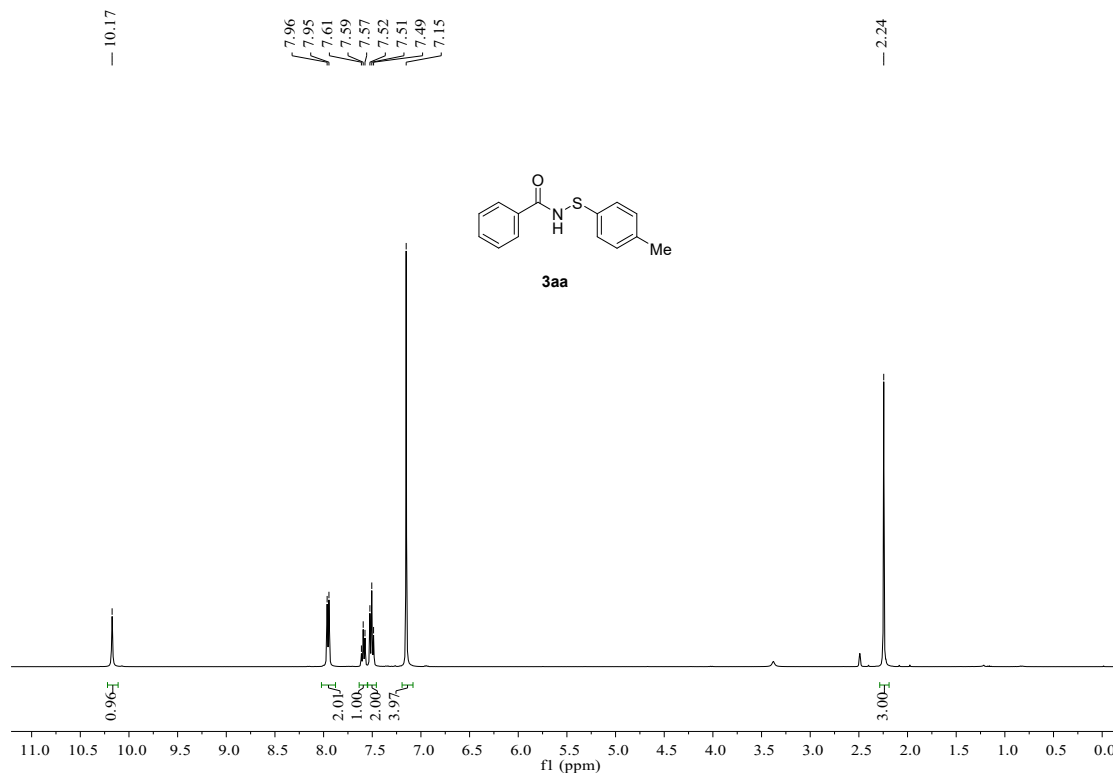

$^{13}\text{C}$  NMR, 100 MHz,  $\text{DMSO}-d_6$

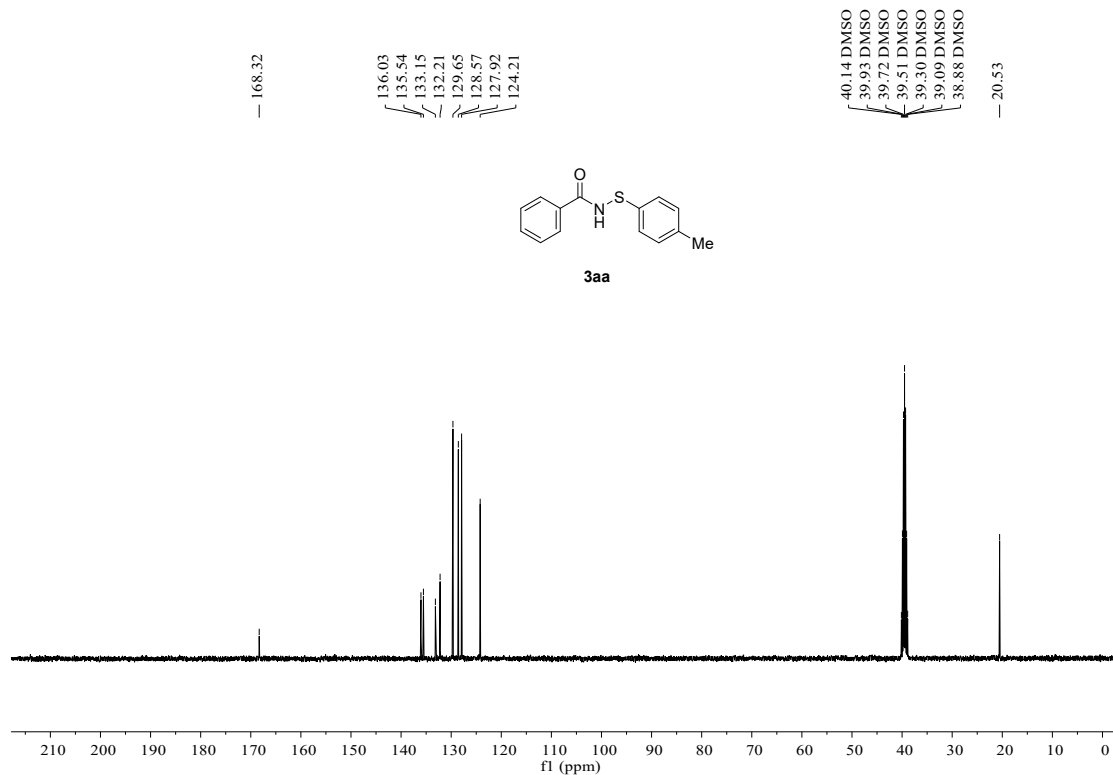

<sup>1</sup>H NMR, 400 MHz, Acetone-d<sub>6</sub>

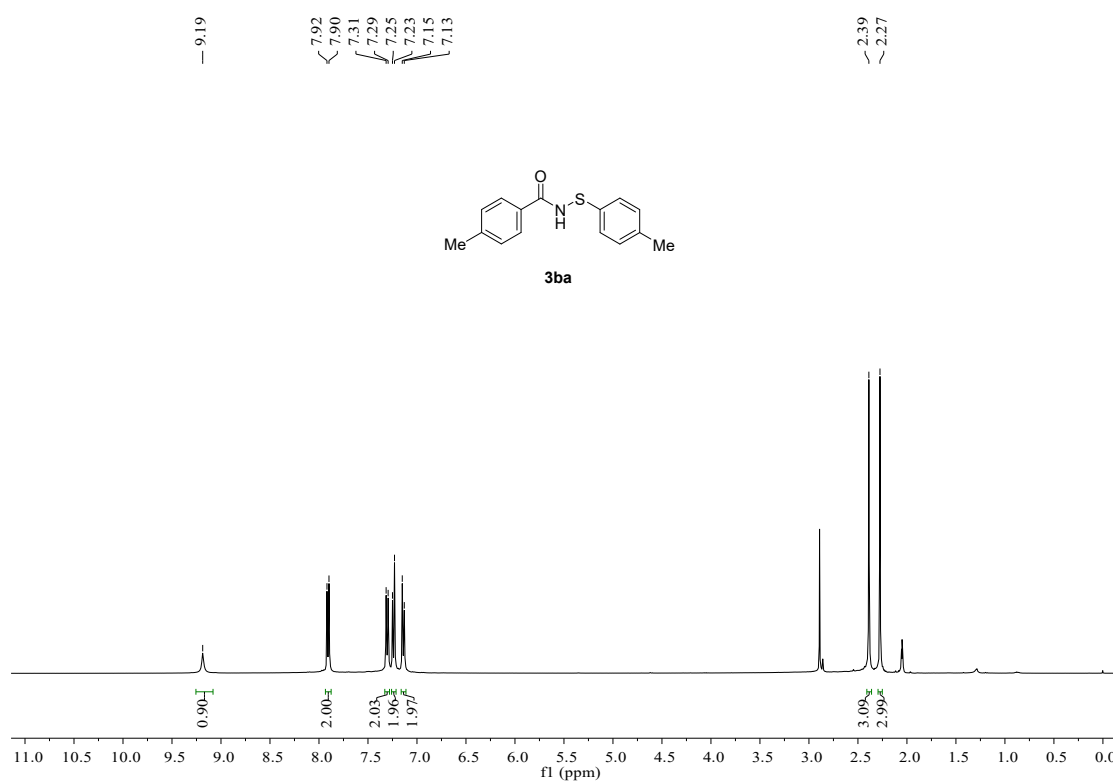

<sup>13</sup>C NMR, 100 MHz, Acetone-d<sub>6</sub>

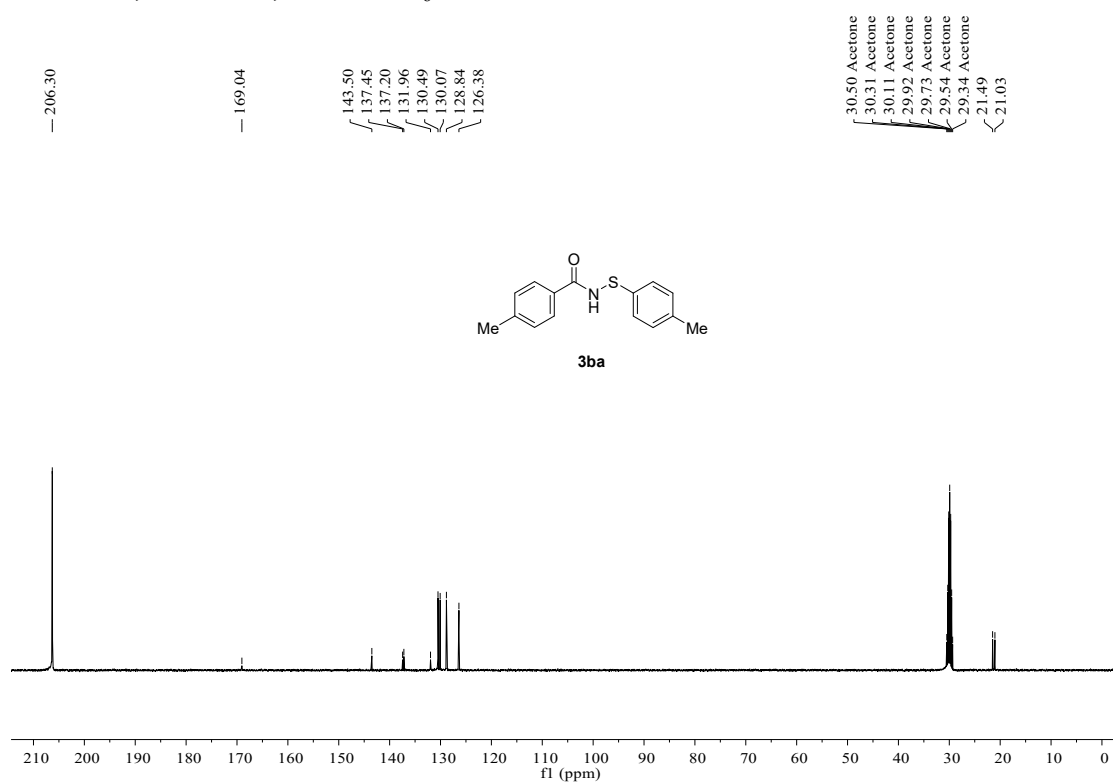

$^1\text{H}$  NMR, 400 MHz,  $\text{CDCl}_3$

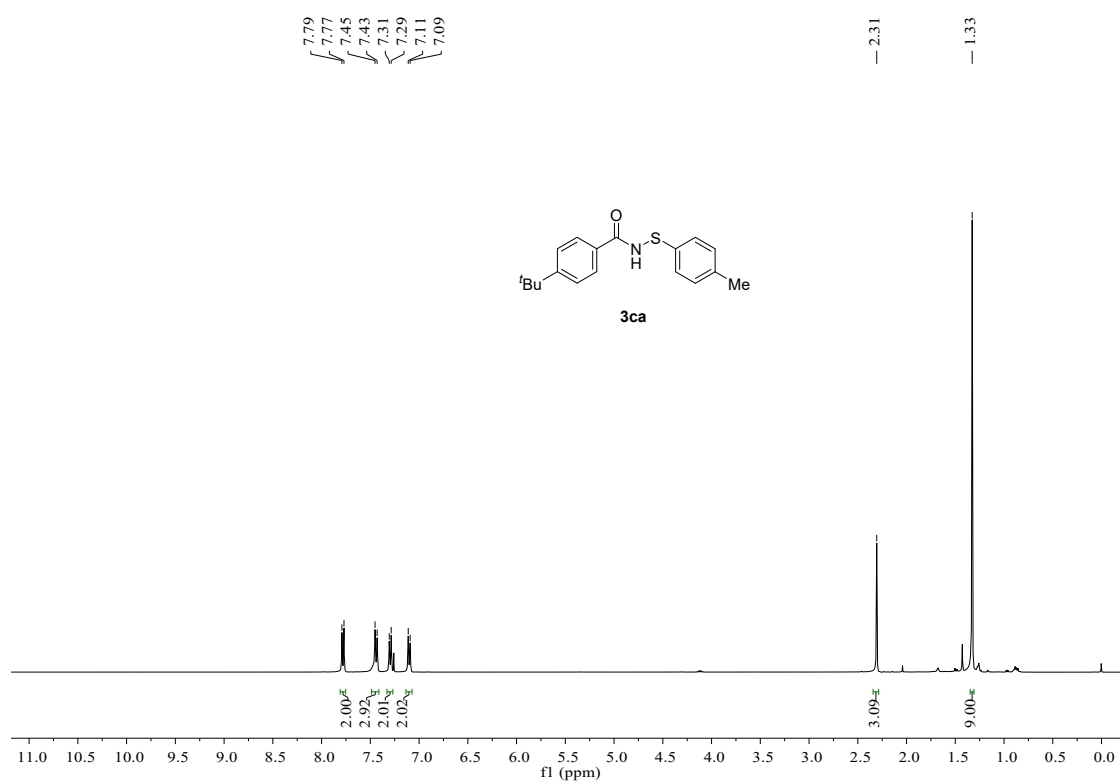

$^{13}\text{C}$  NMR, 100 MHz,  $\text{CDCl}_3$

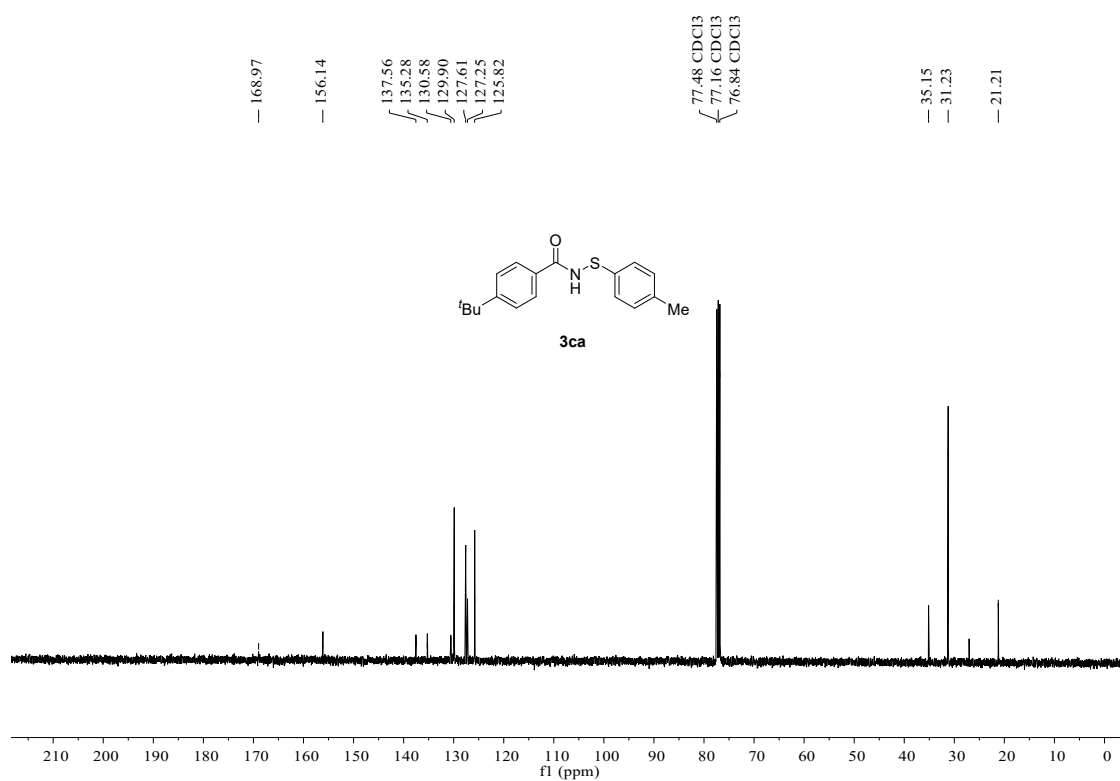



$^1\text{H}$  NMR, 400 MHz, Acetone- $d_6$

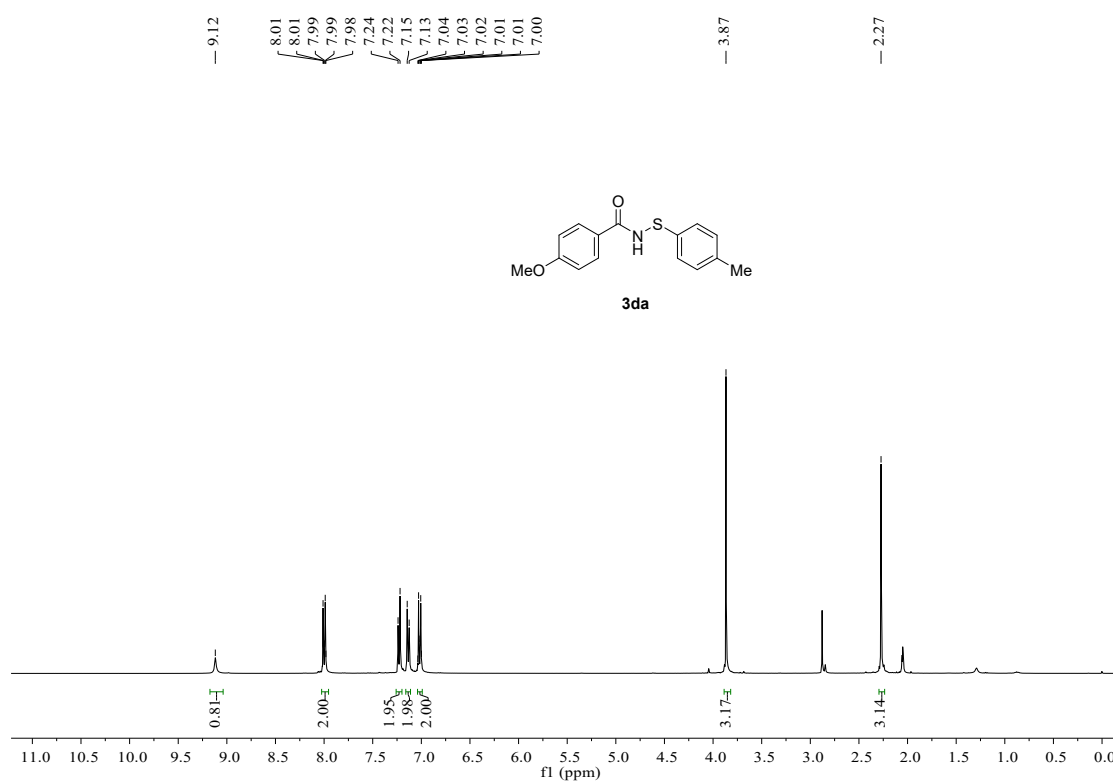

$^{13}\text{C}$  NMR, 100 MHz, Acetone- $d_6$

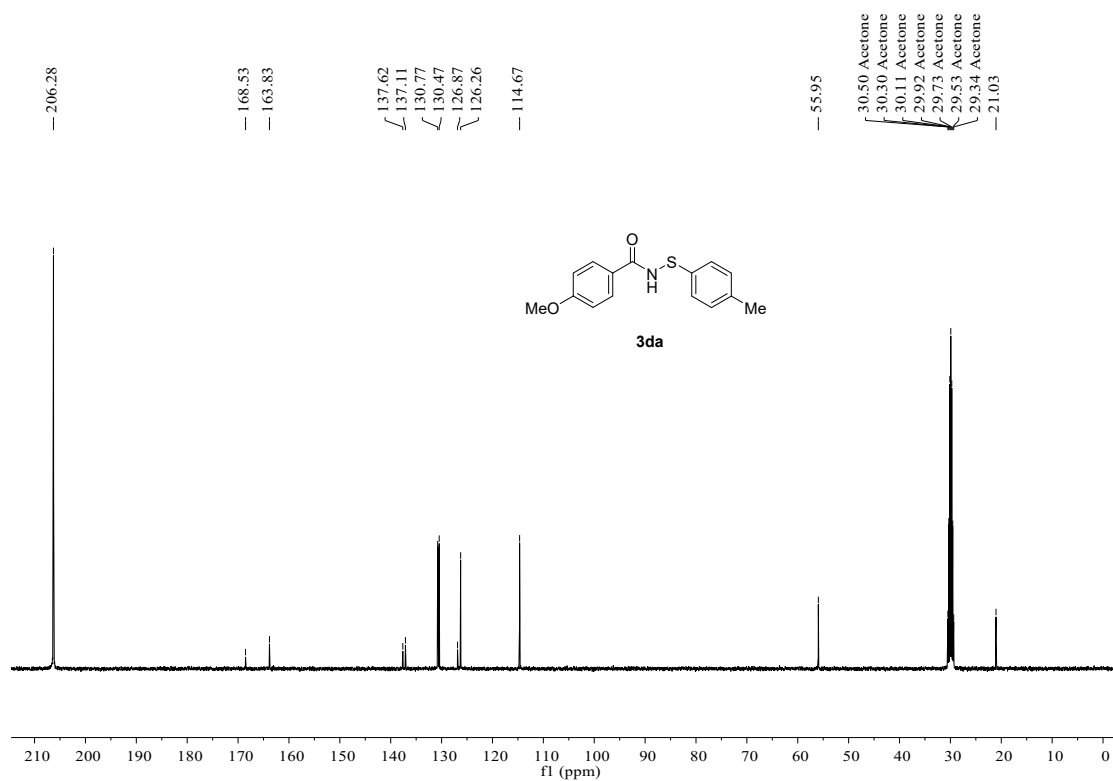

$^1\text{H}$  NMR, 400 MHz,  $\text{CDCl}_3$

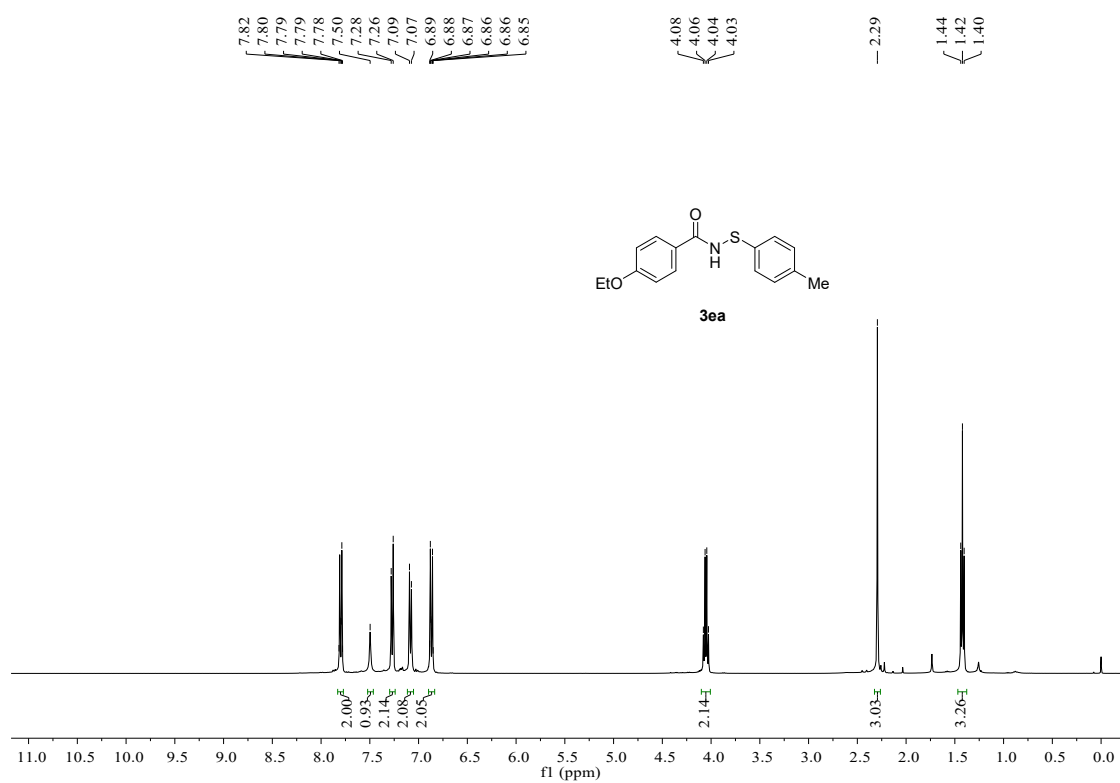

$^{13}\text{C}$  NMR, 100 MHz,  $\text{CDCl}_3$

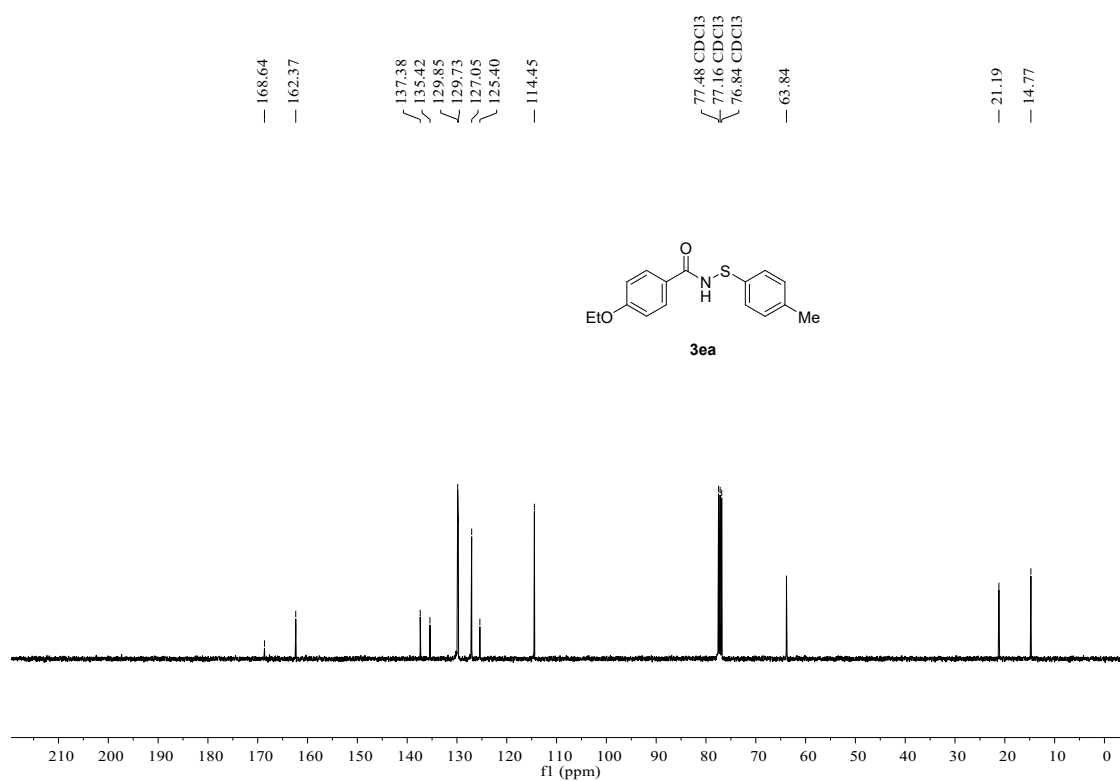

$^1\text{H}$  NMR, 400 MHz,  $\text{DMSO-}d_6$

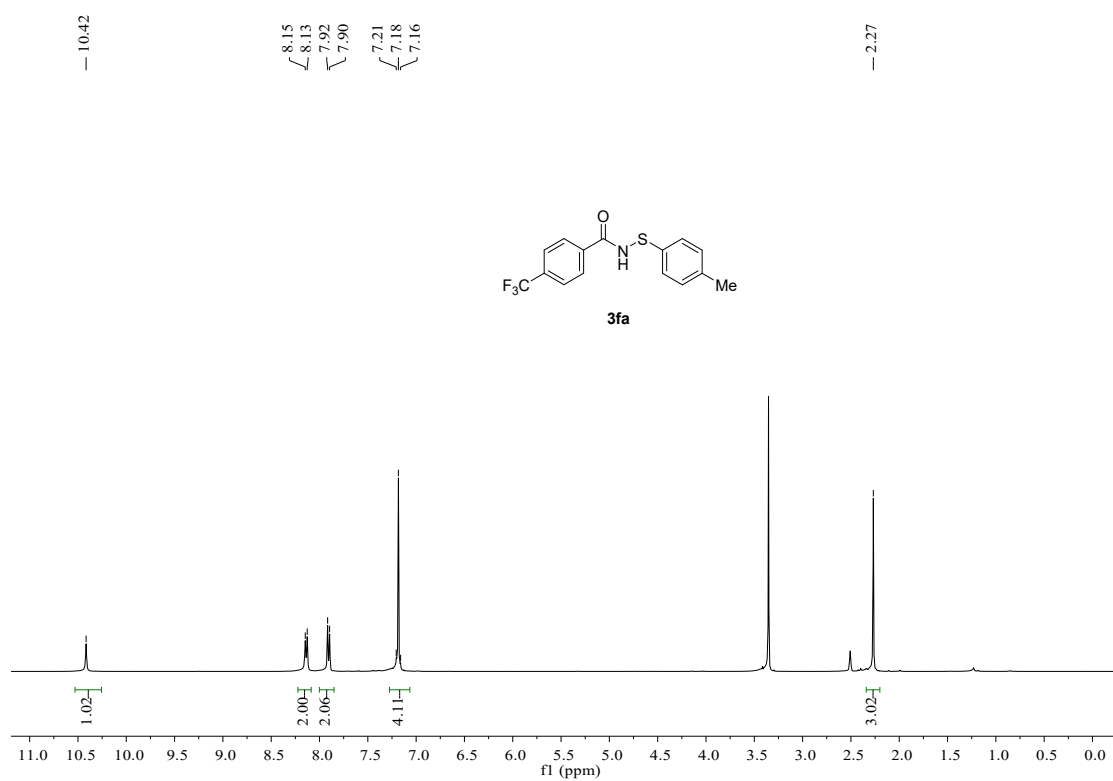

$^{13}\text{C}$  NMR, 100 MHz,  $\text{DMSO-}d_6$

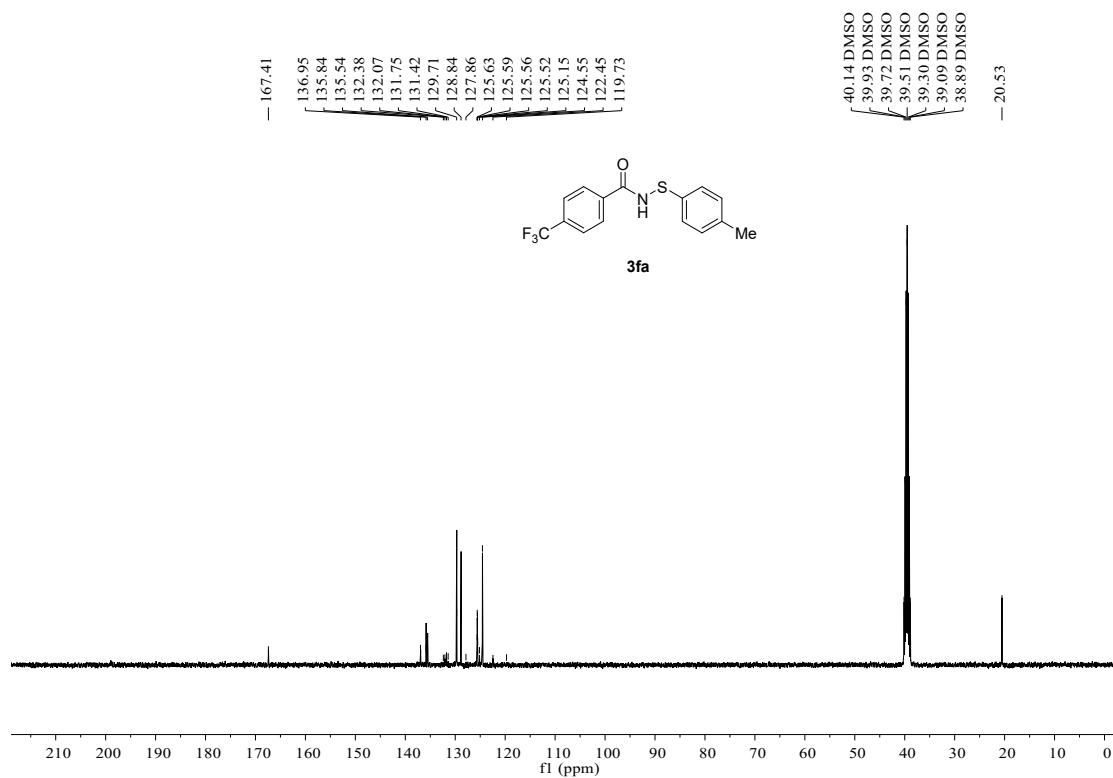

$^1\text{H}$  NMR, 400 MHz,  $\text{DMSO-}d_6$

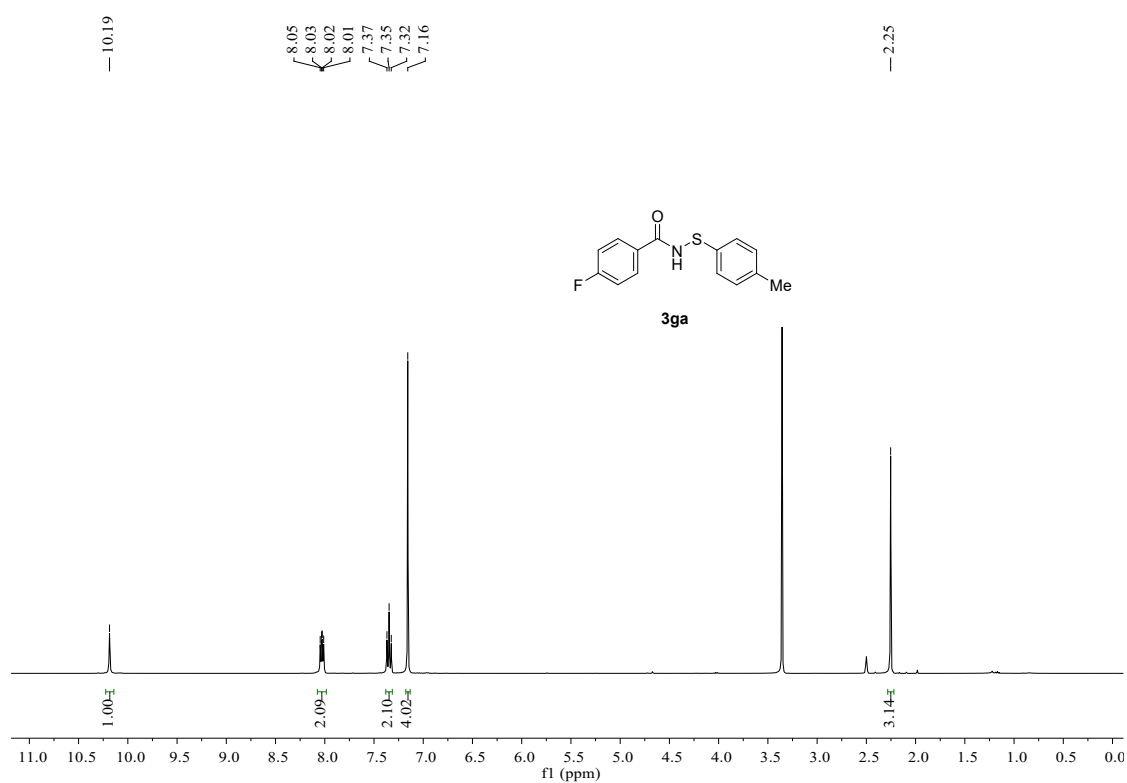

$^{13}\text{C}$  NMR, 100 MHz,  $\text{DMSO-}d_6$

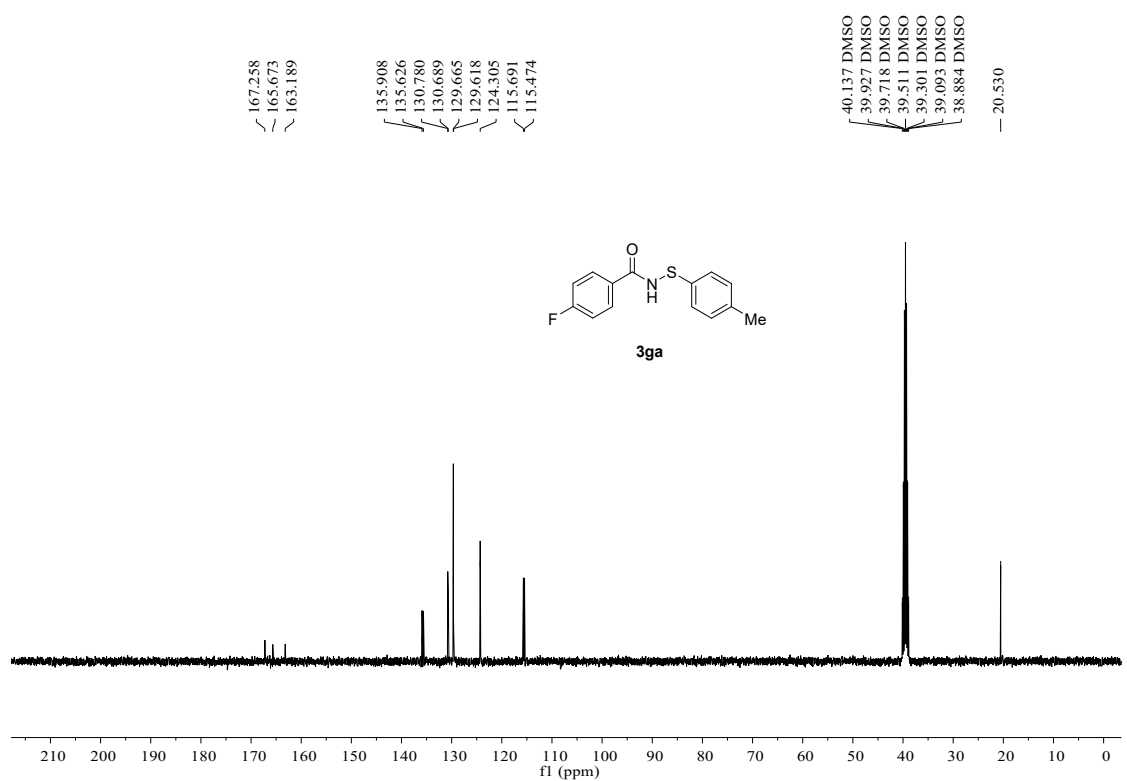

$^1\text{H}$  NMR, 400 MHz,  $\text{DMSO-}d_6$

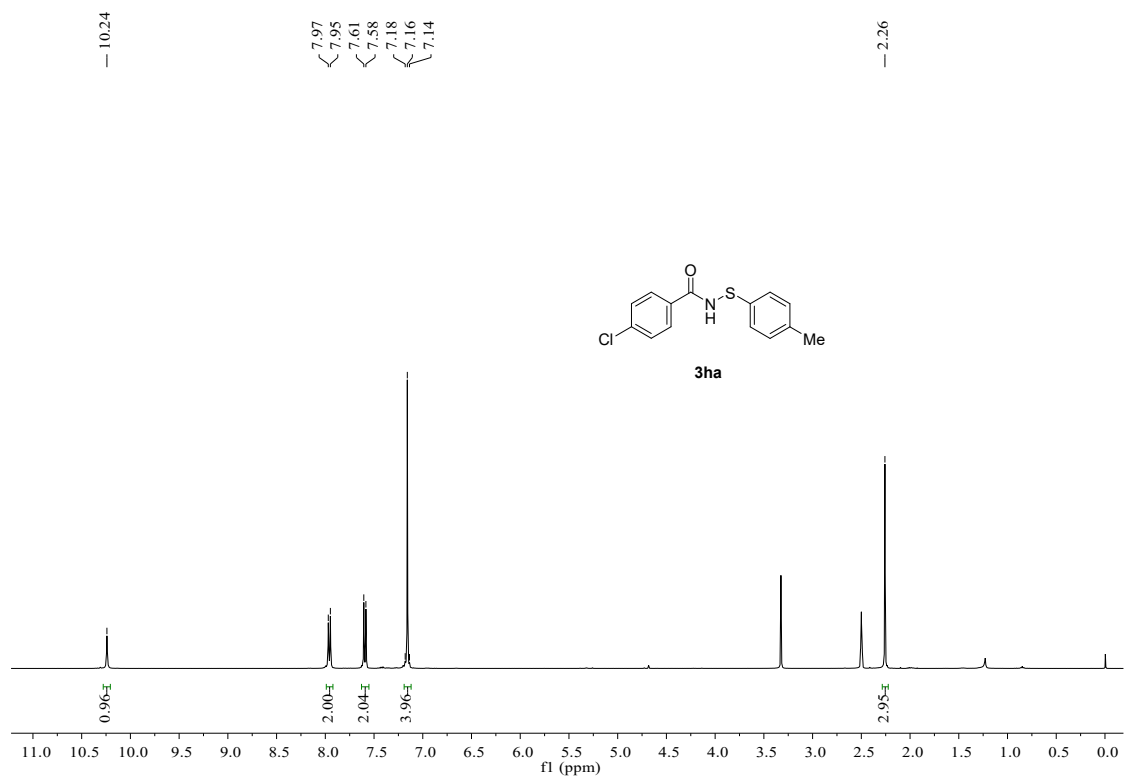

$^{13}\text{C}$  NMR, 100 MHz,  $\text{DMSO-}d_6$

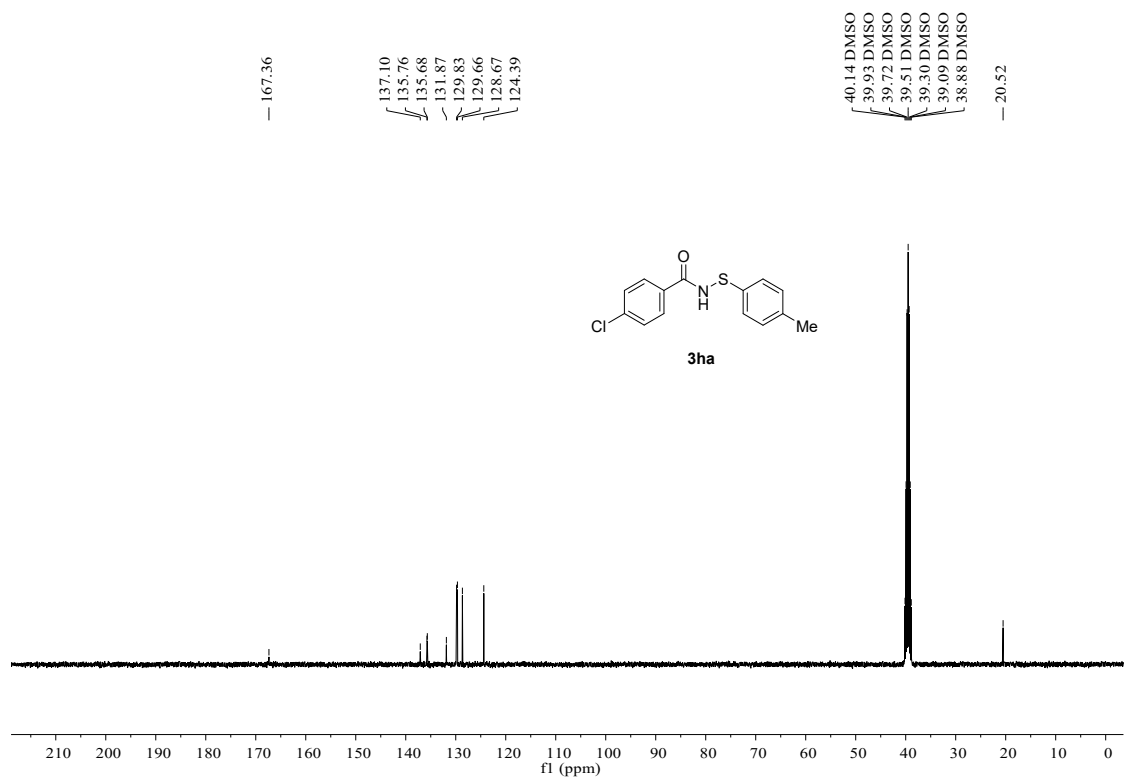

$^1\text{H}$  NMR, 600 MHz,  $\text{DMSO-}d_6$

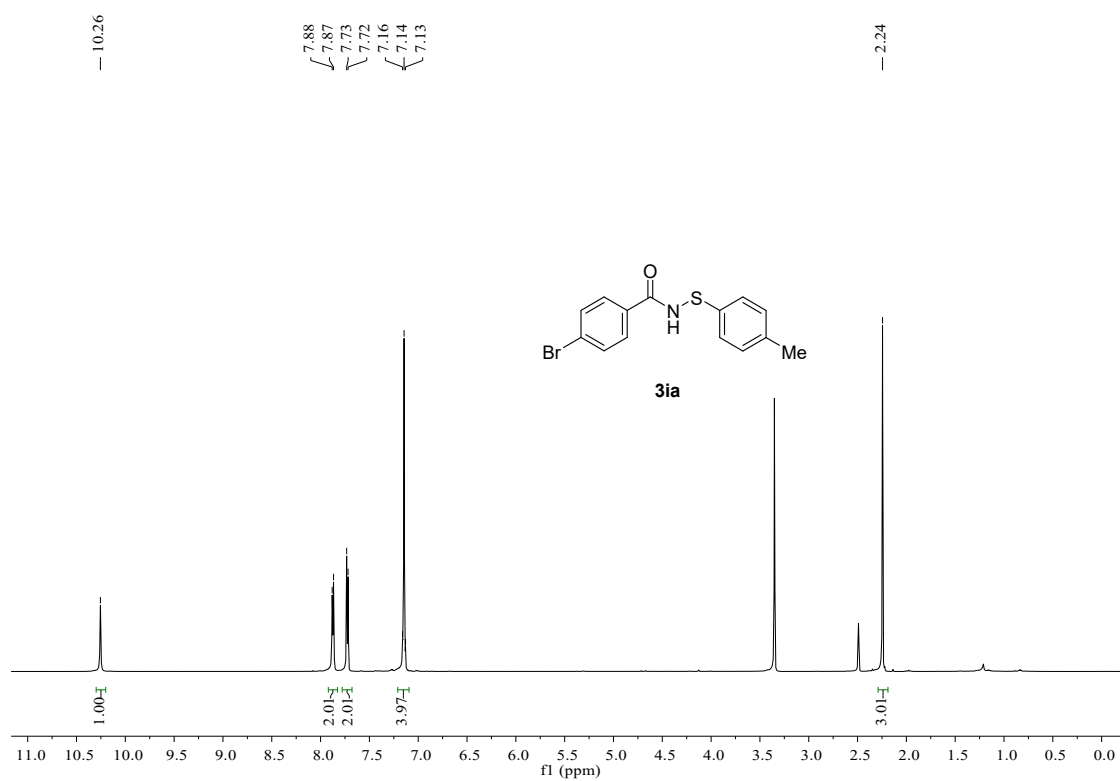

$^{13}\text{C}$  NMR, 150 MHz,  $\text{DMSO-}d_6$

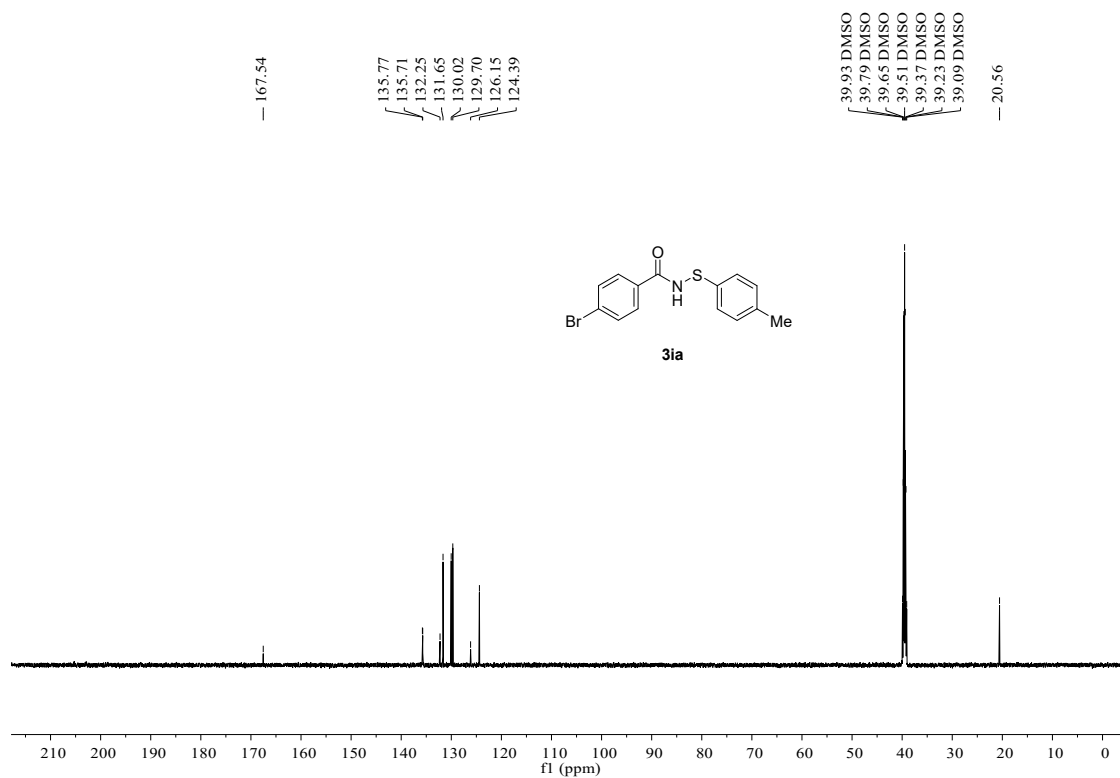

$^1\text{H}$  NMR, 400 MHz,  $\text{CDCl}_3$

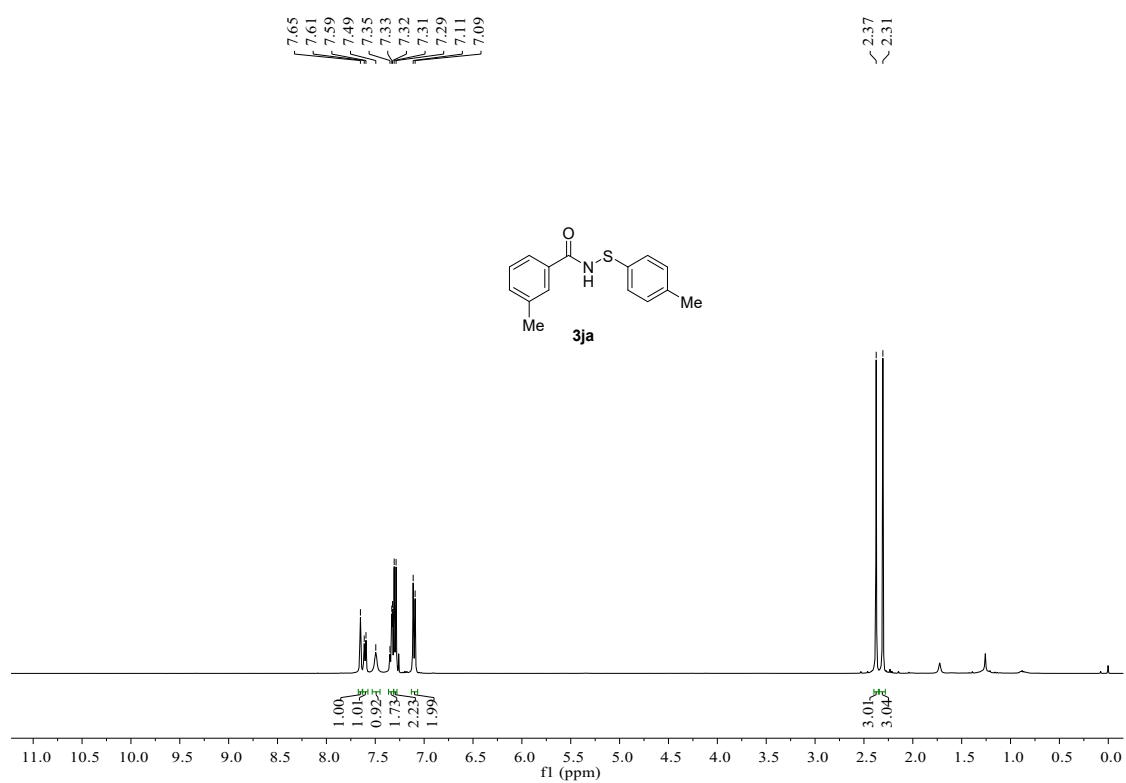

$^{13}\text{C}$  NMR, 150 MHz,  $\text{CDCl}_3$

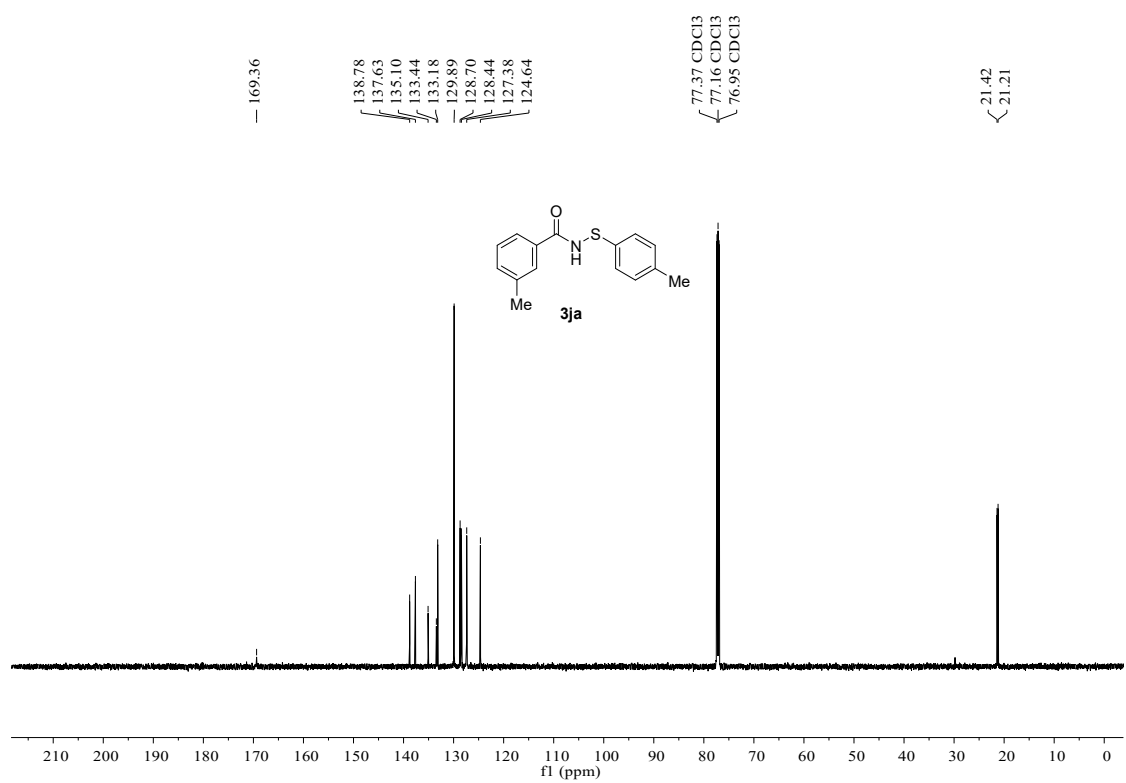

$^1\text{H}$  NMR, 400 MHz, Acetone- $d_6$

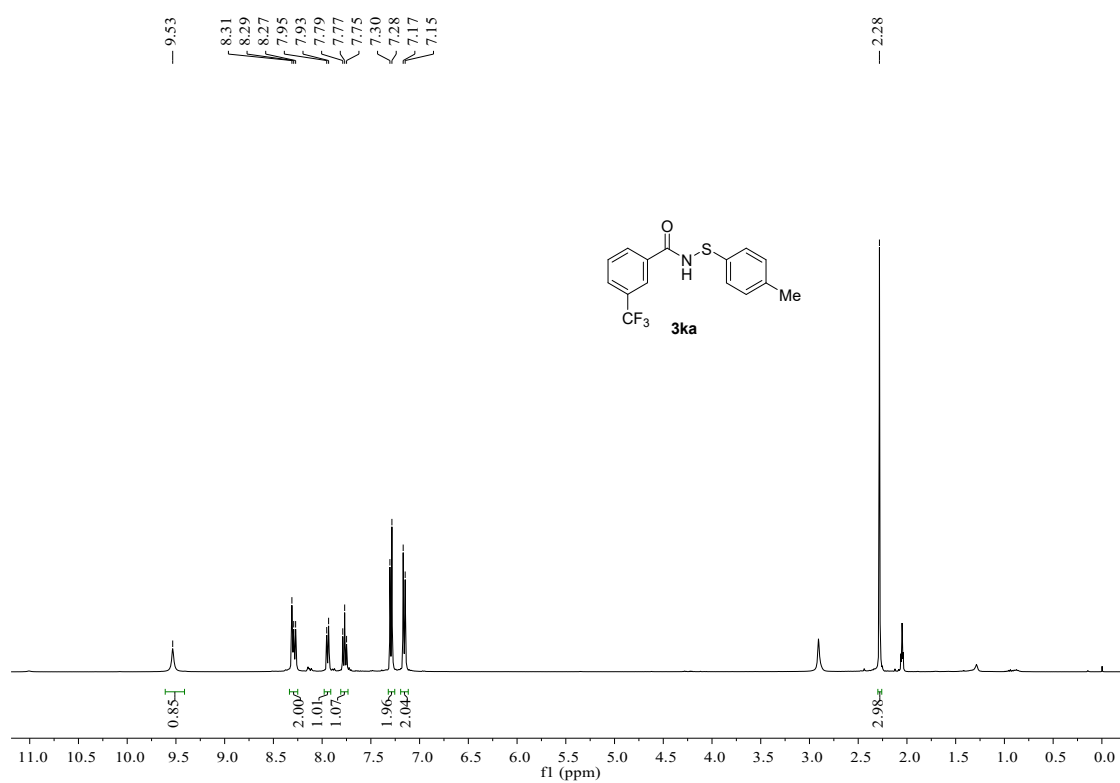

$^{13}\text{C}$  NMR, 100 MHz, Acetone- $d_6$

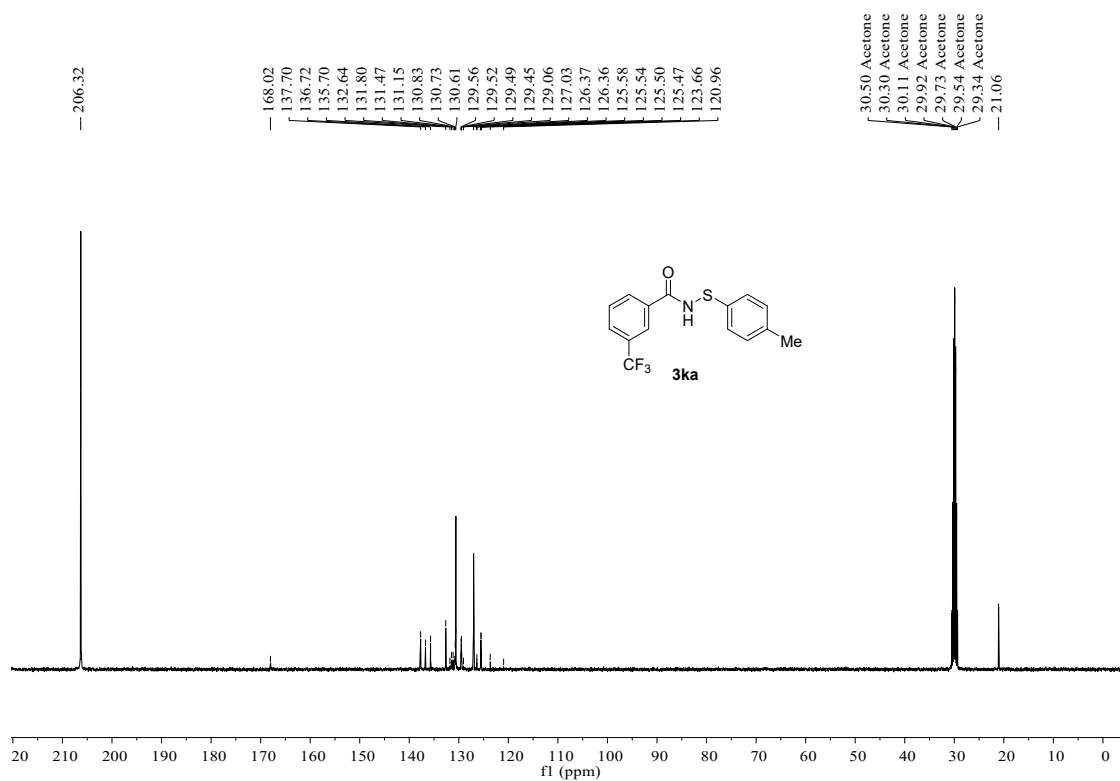



$^1\text{H}$  NMR, 600 MHz,  $\text{DMSO-}d_6$

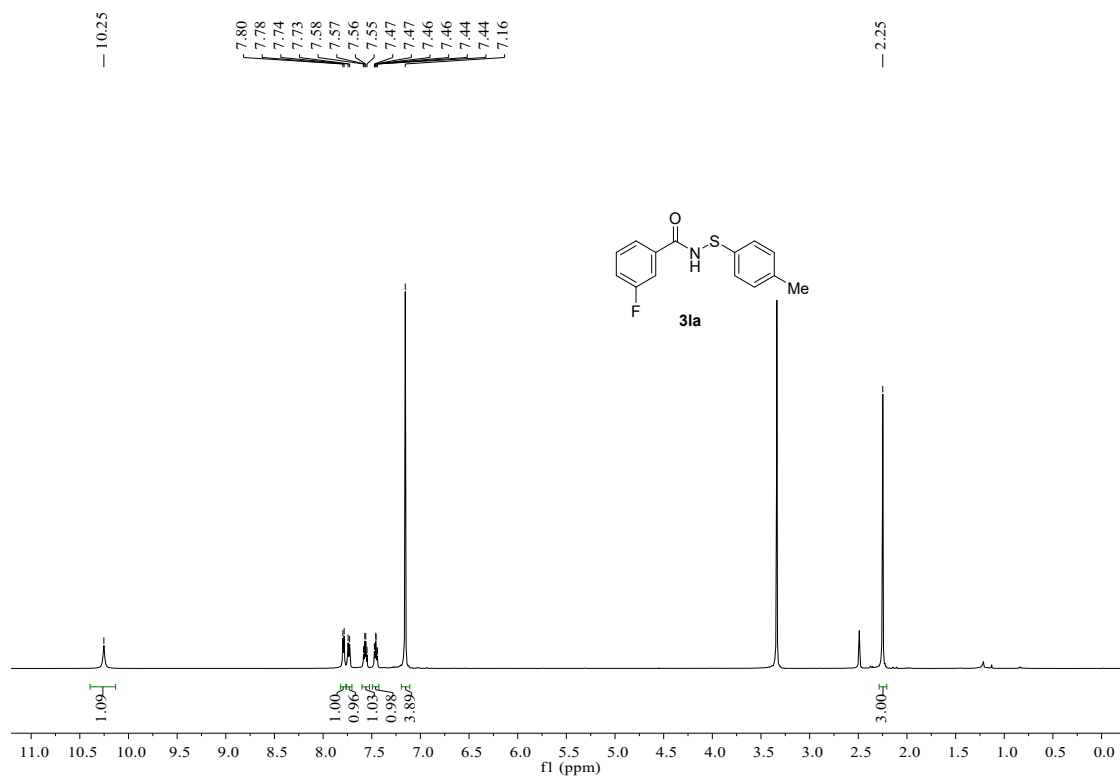

$^{13}\text{C}$  NMR, 150 MHz,  $\text{DMSO-}d_6$

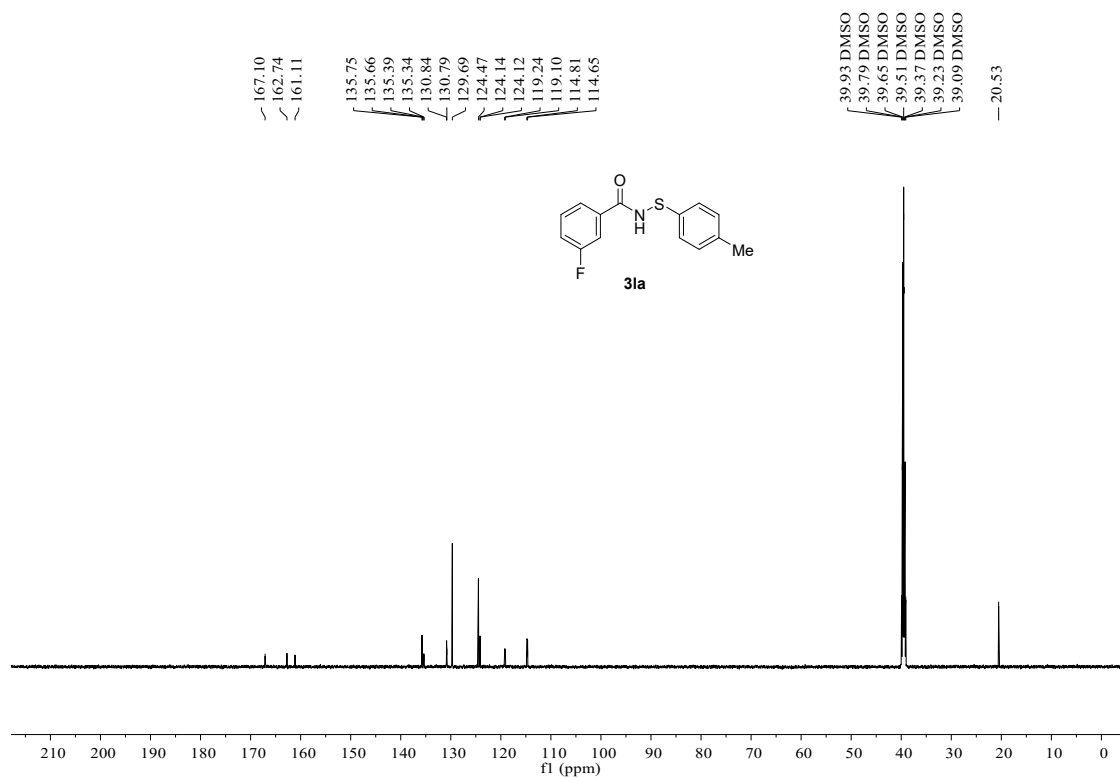

$^1\text{H}$  NMR, 400 MHz,  $\text{DMSO-}d_6$

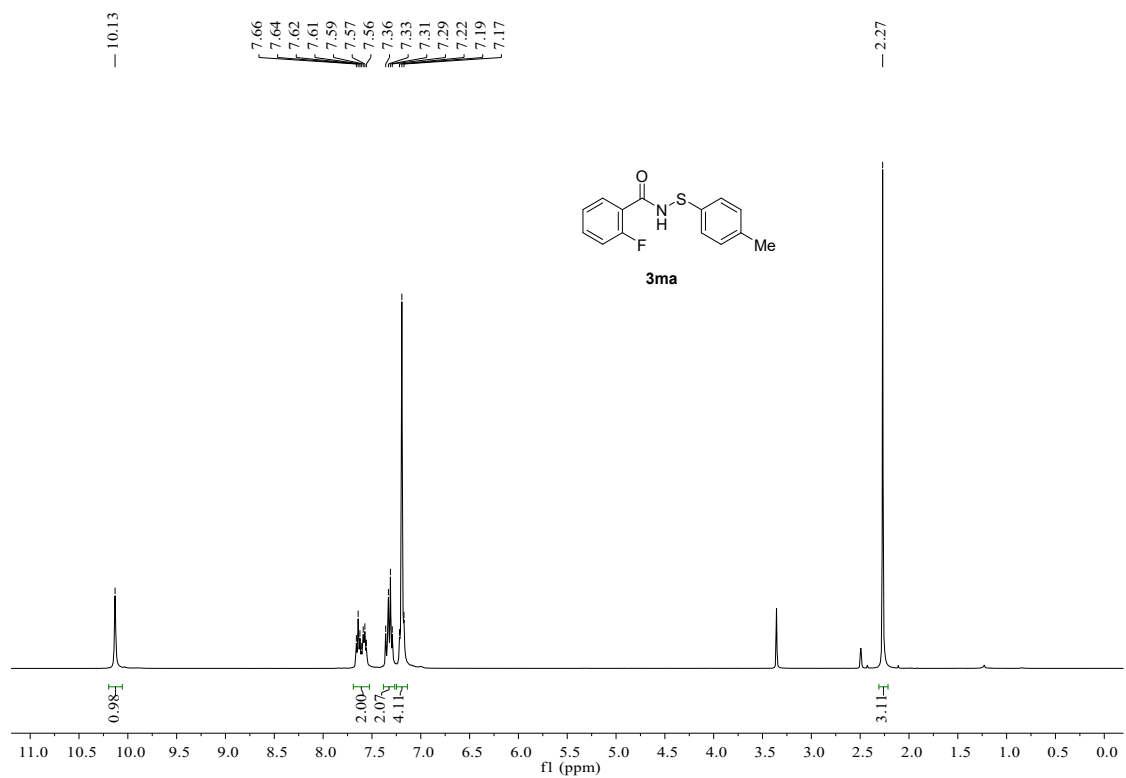

$^{13}\text{C}$  NMR, 100 MHz,  $\text{DMSO-}d_6$

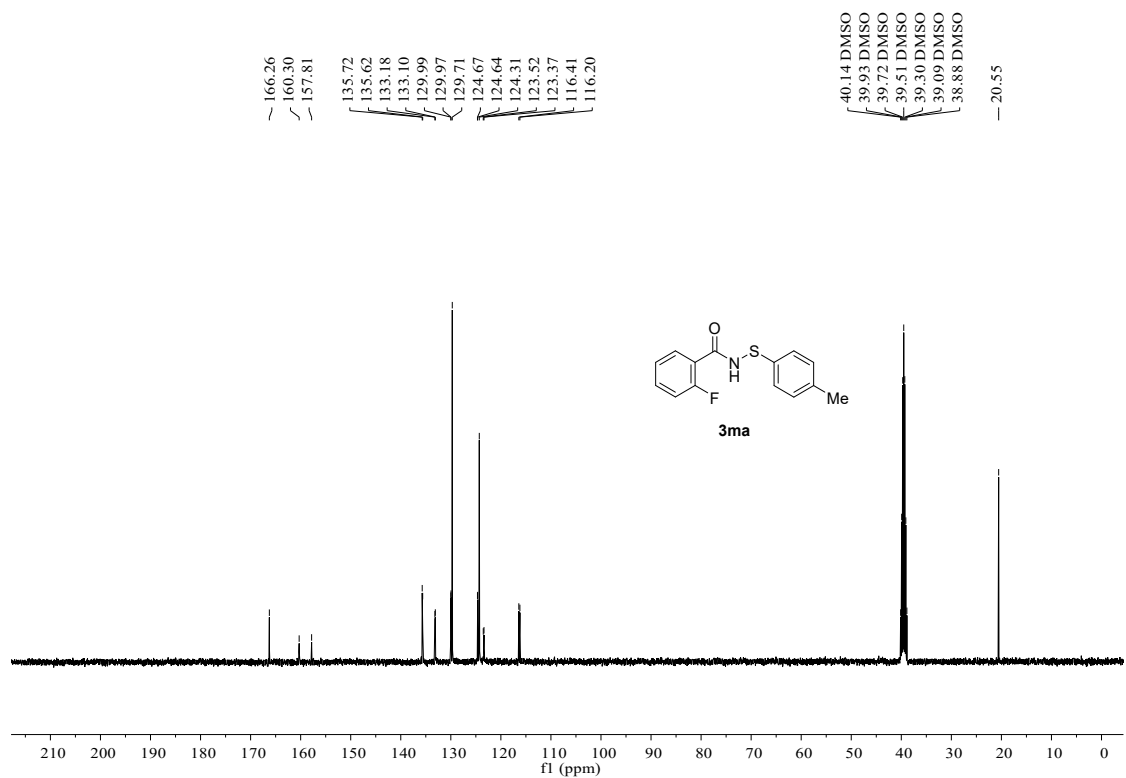

$^1\text{H}$  NMR, 400 MHz,  $\text{CDCl}_3$

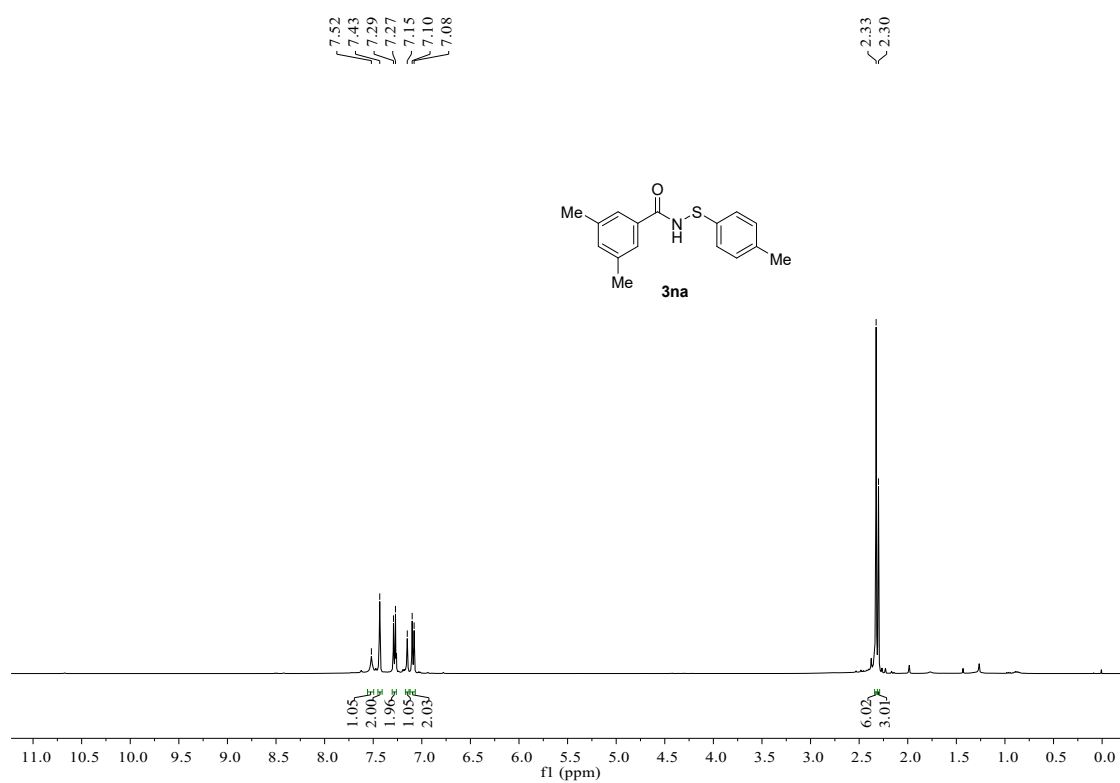

$^{13}\text{C}$  NMR, 100 MHz,  $\text{CDCl}_3$

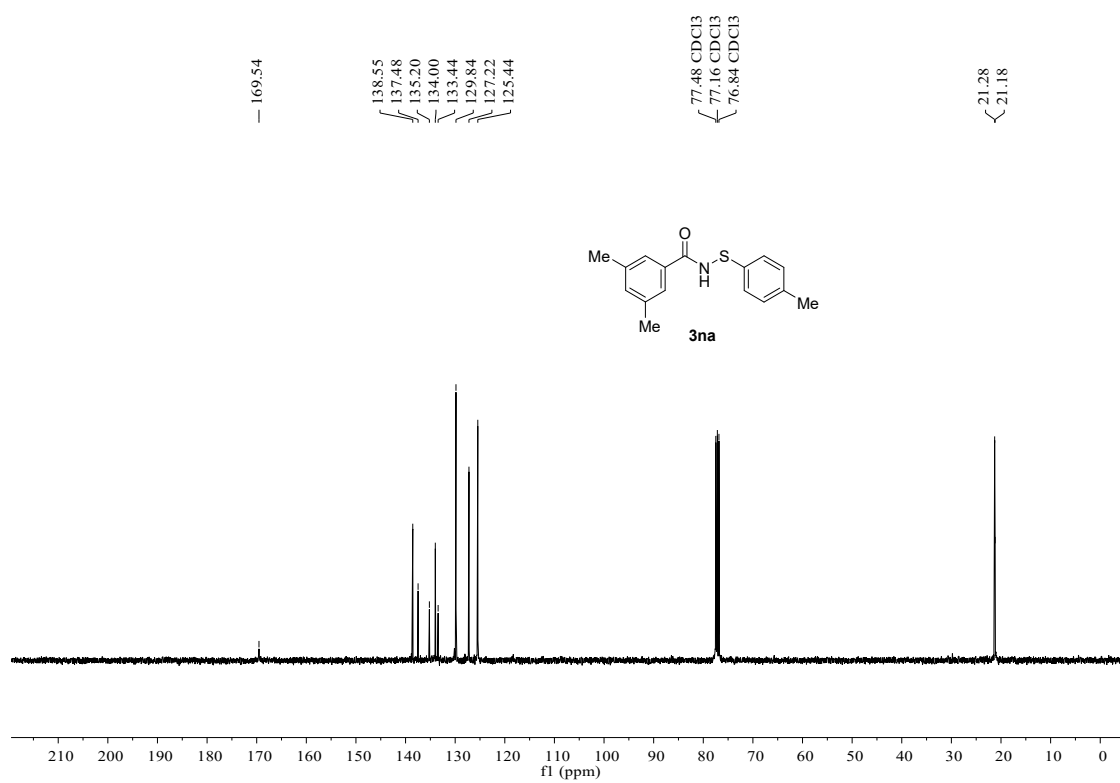

$^1\text{H}$  NMR, 400 MHz,  $\text{DMSO-}d_6$

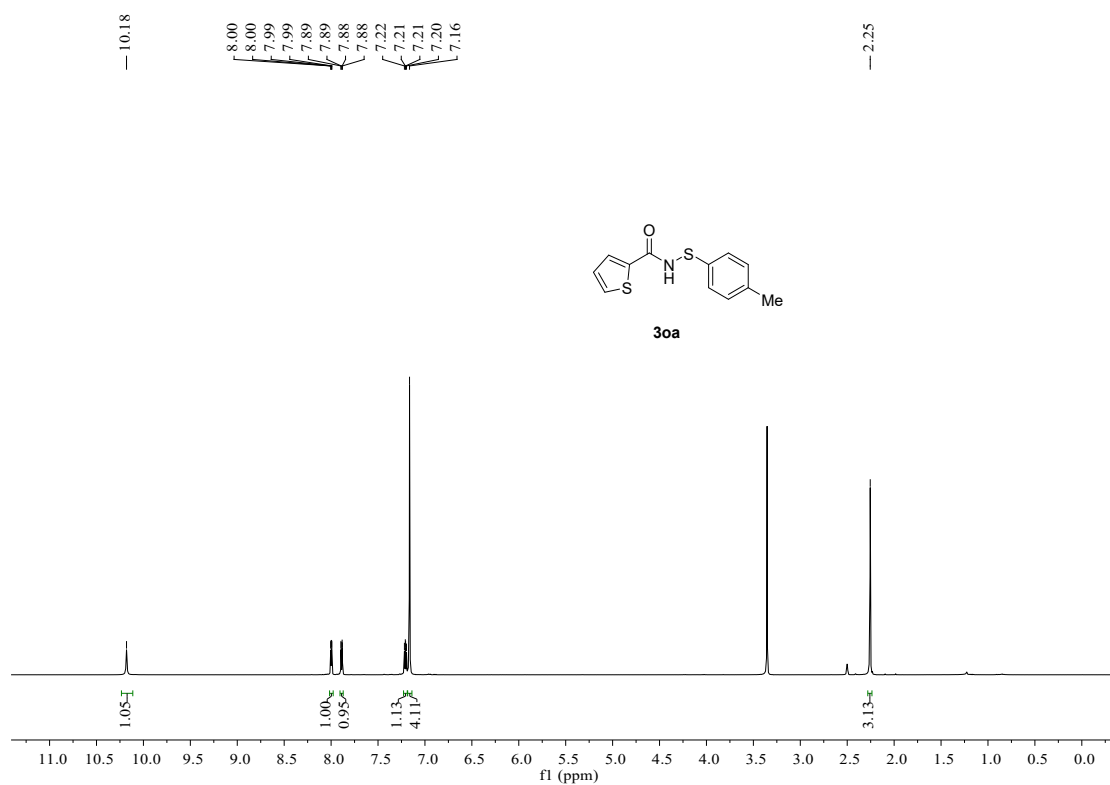

$^{13}\text{C}$  NMR, 100 MHz,  $\text{DMSO-}d_6$

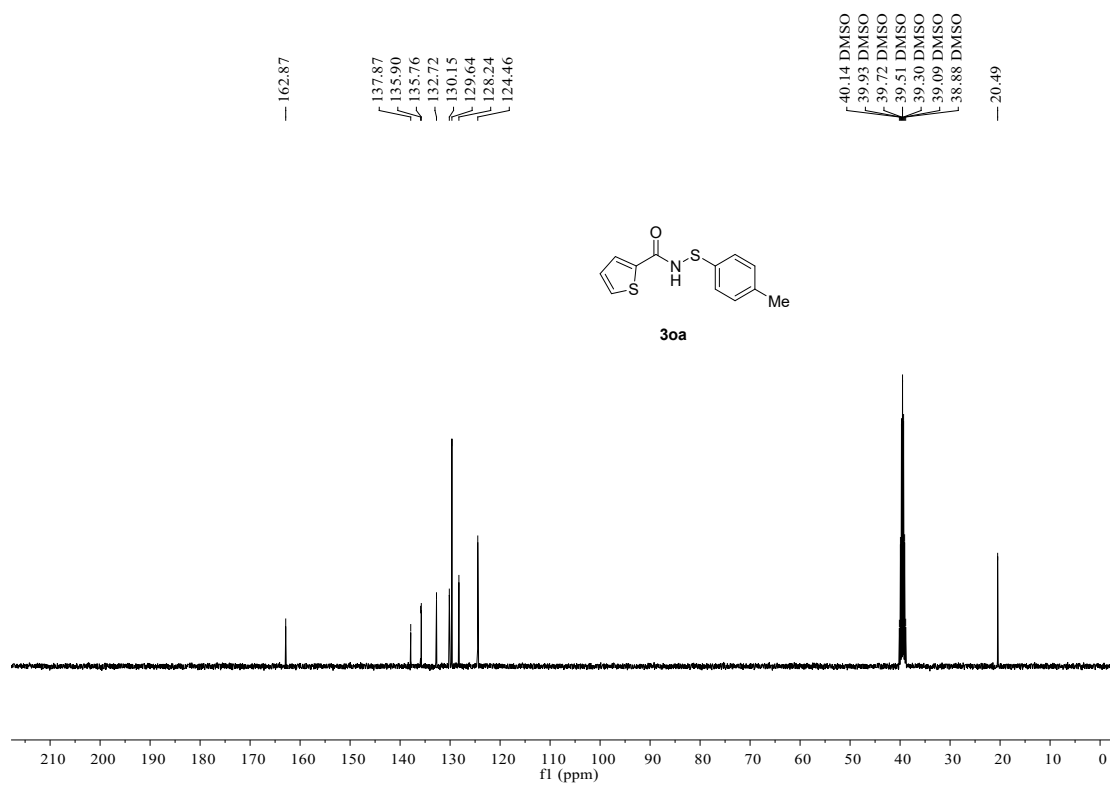

$^1\text{H}$  NMR, 400 MHz,  $\text{DMSO-}d_6$

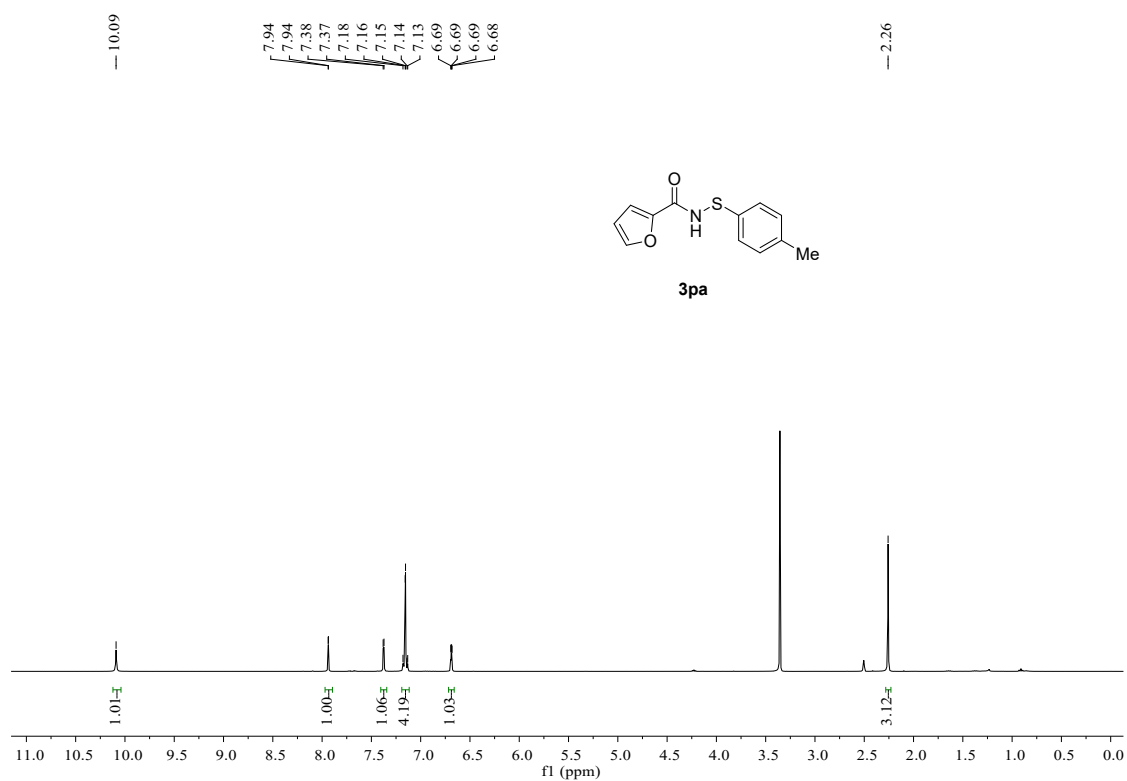

$^{13}\text{C}$  NMR, 100 MHz,  $\text{DMSO-}d_6$

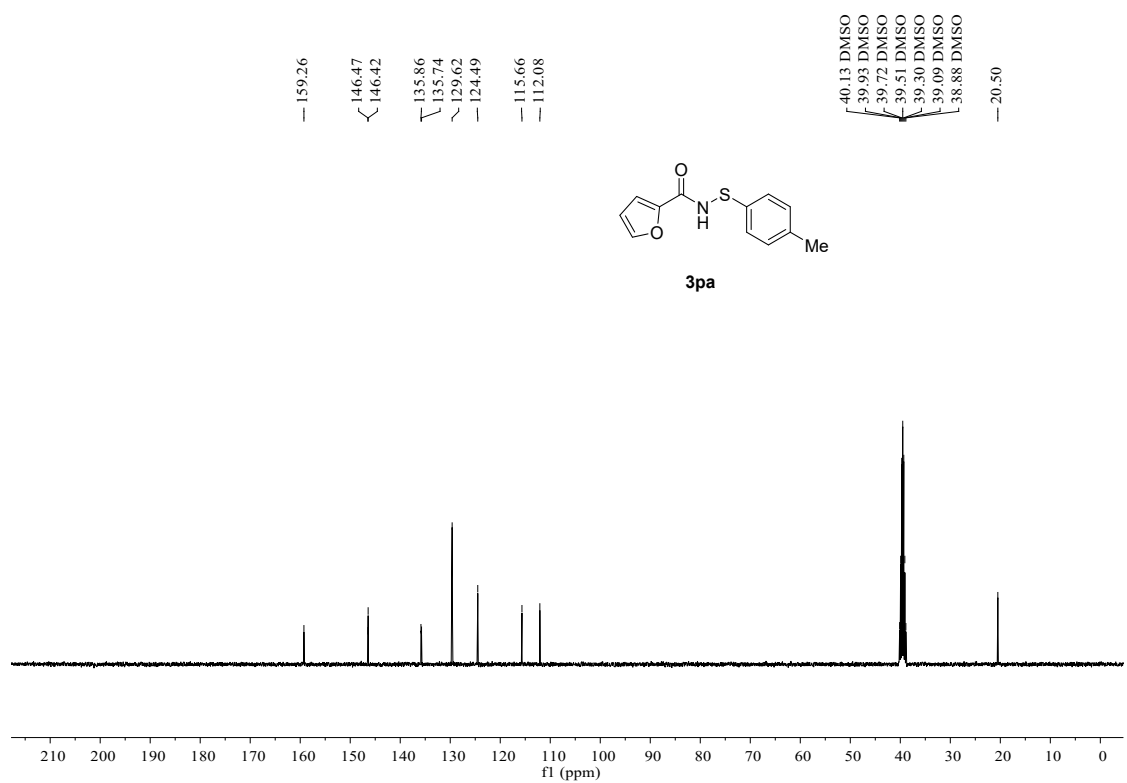

<sup>1</sup>H NMR, 400 MHz, DMSO-*d*<sub>6</sub>

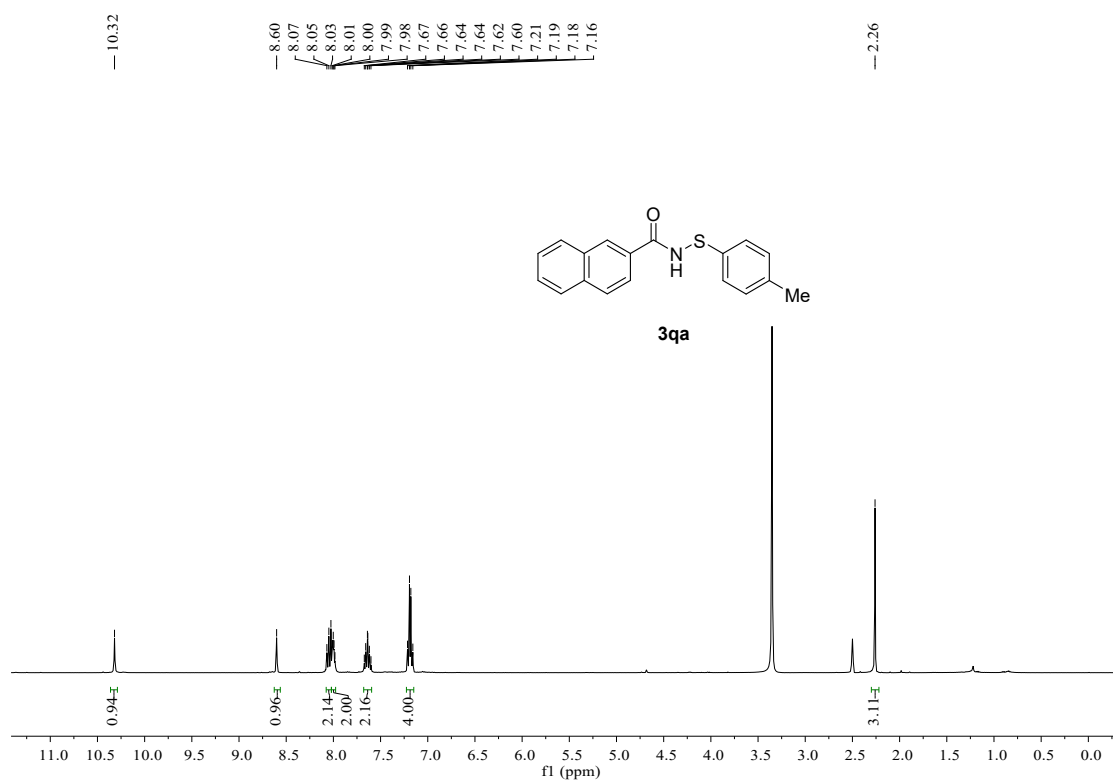

<sup>13</sup>C NMR, 100 MHz, DMSO-*d*<sub>6</sub>

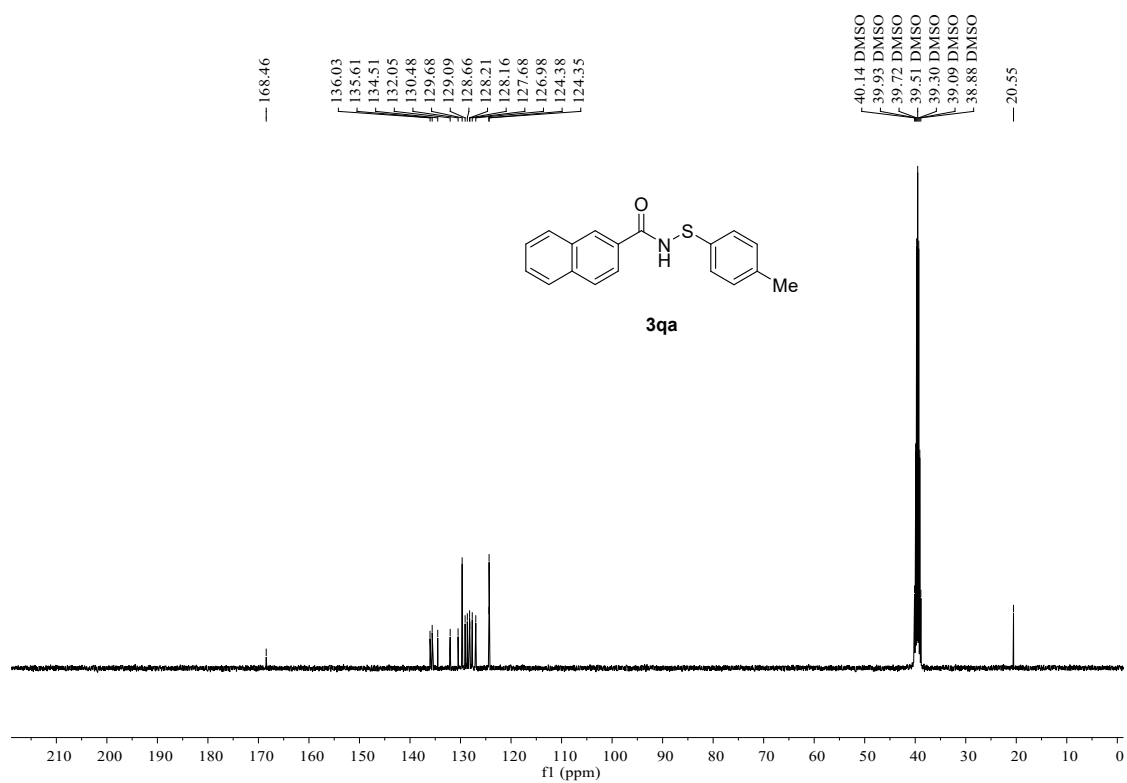

$^1\text{H}$  NMR, 400 MHz,  $\text{CD}_3\text{OD}$

7.19  
7.17  
7.14  
7.12

2.37  
2.35  
2.33  
2.30  
1.67  
1.65  
1.64  
1.62  
1.30  
0.91  
0.90  
0.88

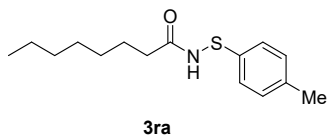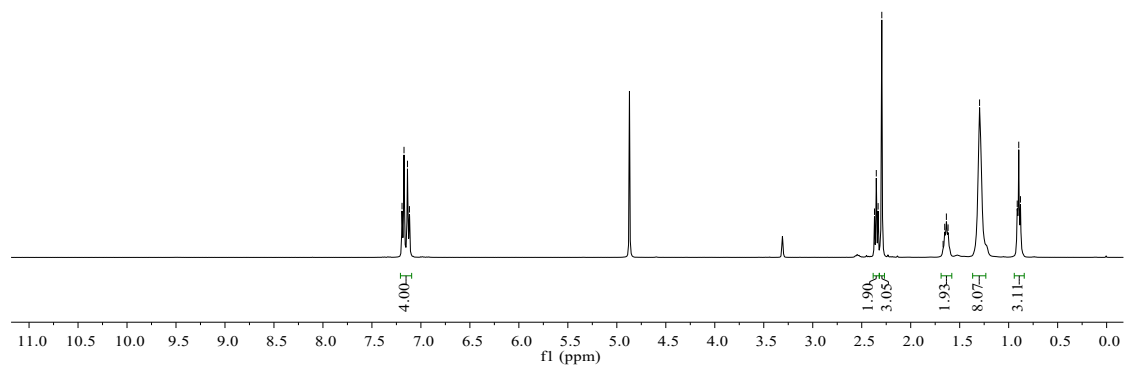

$^{13}\text{C}$  NMR, 100 MHz,  $\text{CD}_3\text{OD}$

177.10

136.74  
135.51  
129.29  
125.88

48.27  
48.06  
47.85  
47.63  
47.42  
47.21  
47.00  
35.78  
31.49  
28.78  
28.68  
25.53  
22.26  
19.68  
13.05

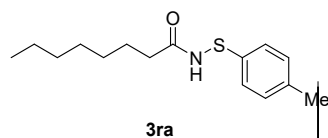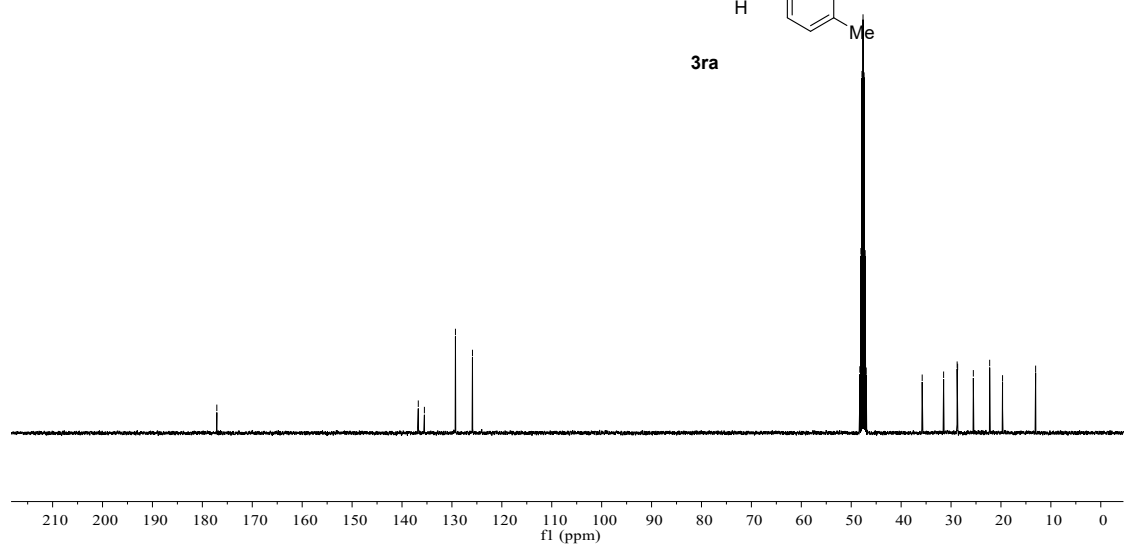

$^1\text{H}$  NMR, 400 MHz,  $\text{DMSO-}d_6$

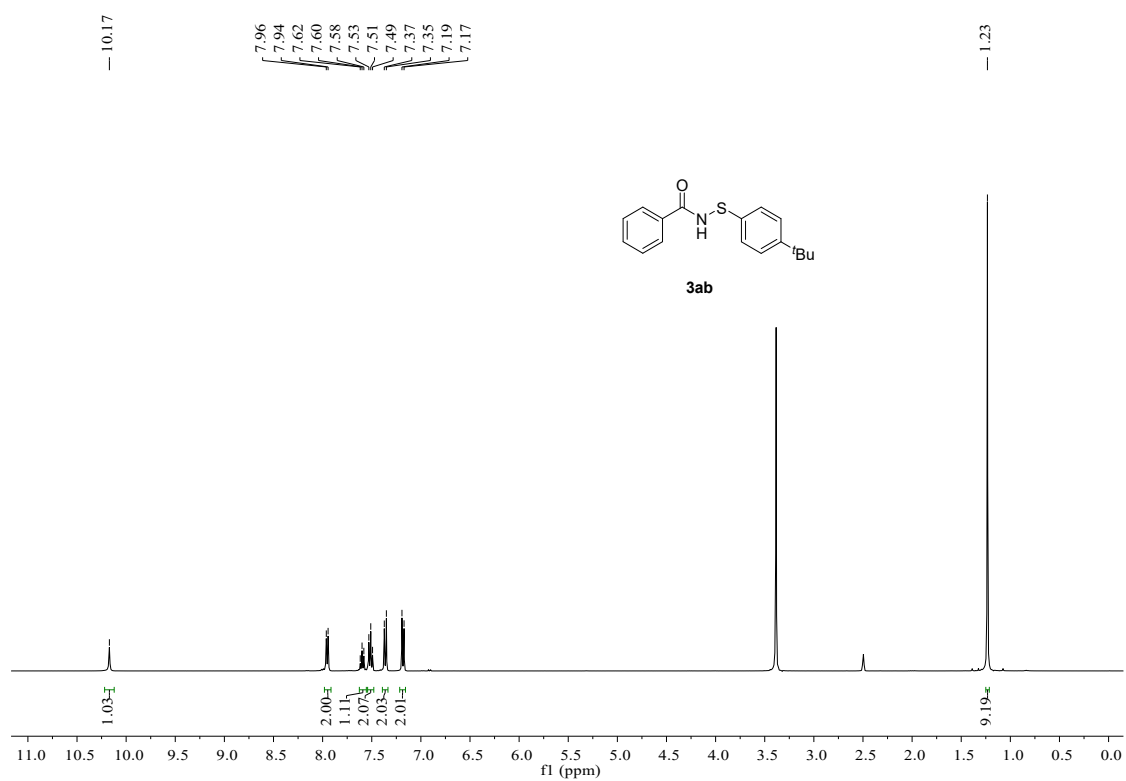

$^{13}\text{C}$  NMR, 100 MHz,  $\text{DMSO-}d_6$

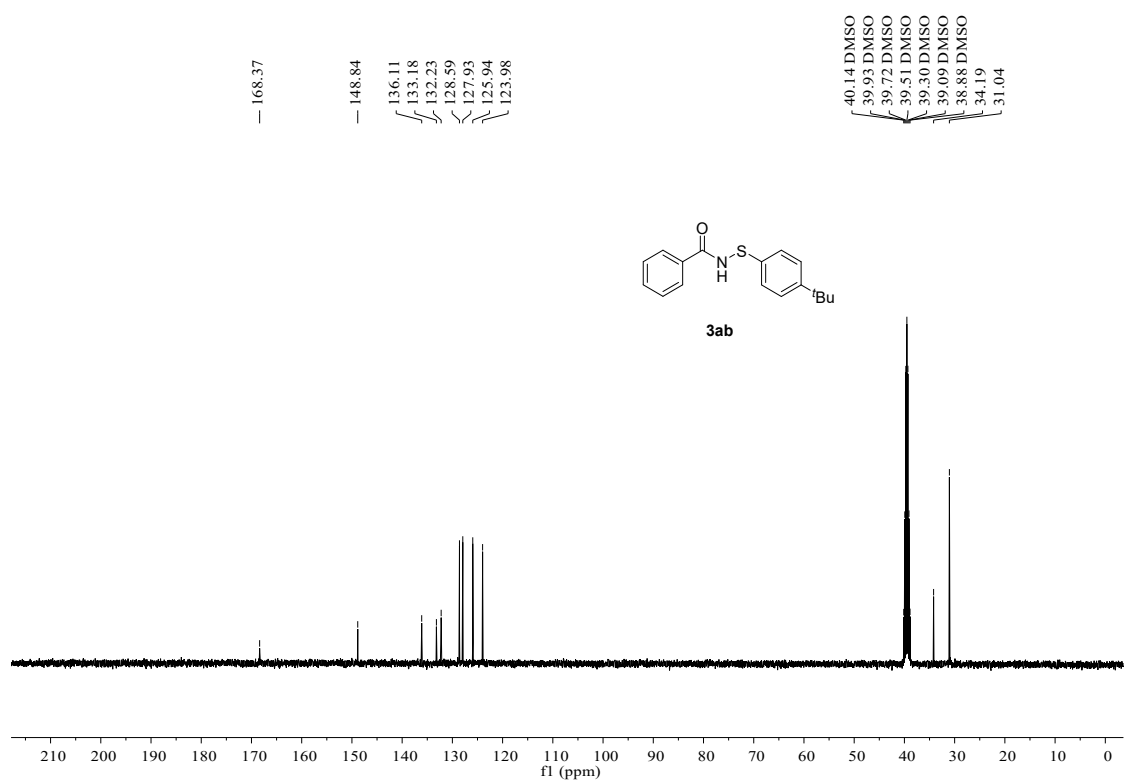



$^1\text{H}$  NMR, 400 MHz,  $\text{DMSO-}d_6$

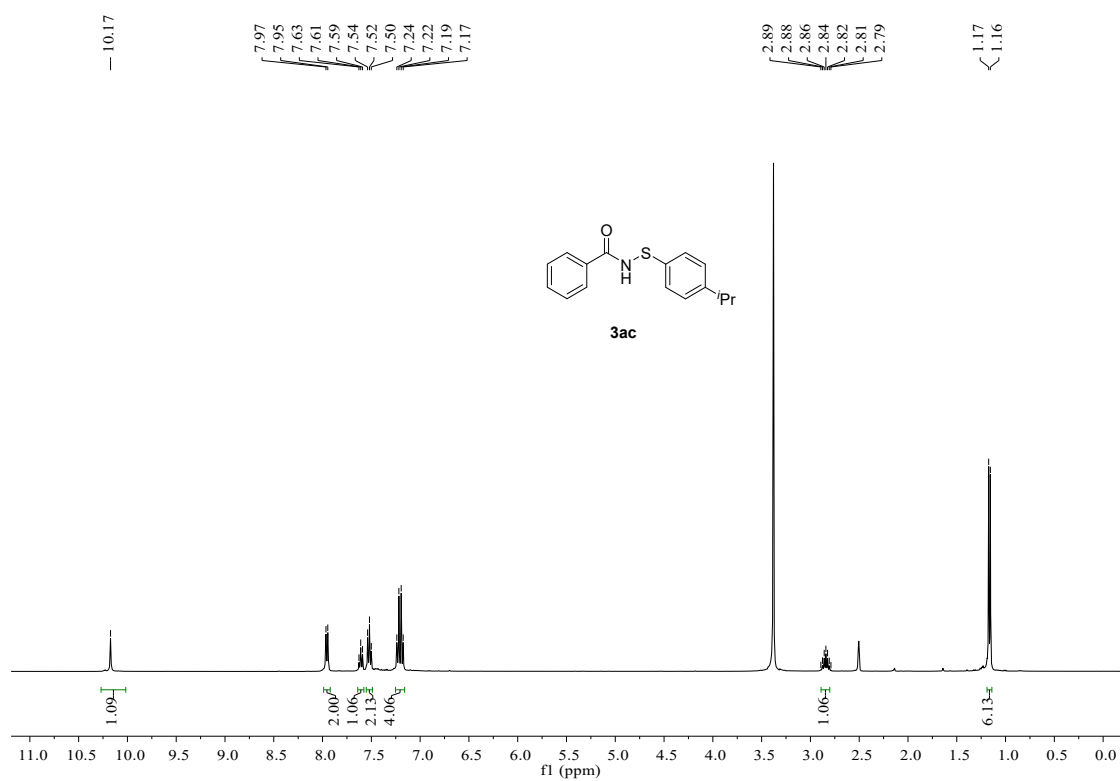

$^{13}\text{C}$  NMR, 100 MHz,  $\text{DMSO-}d_6$

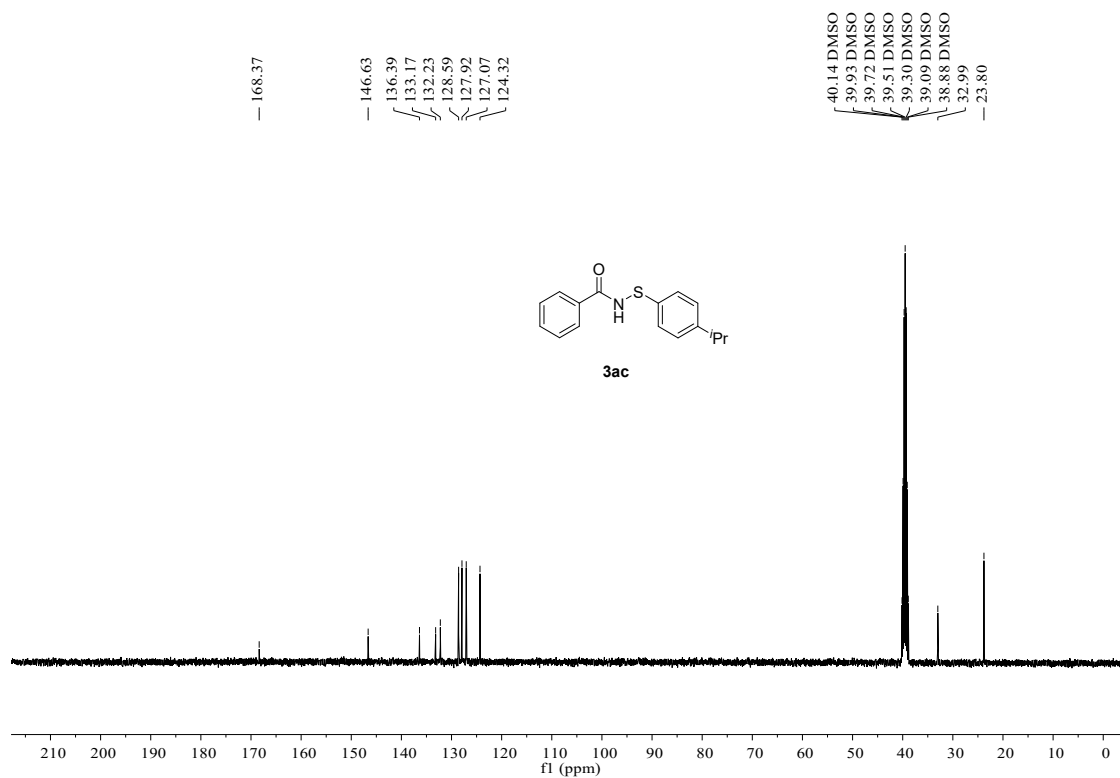

$^1\text{H}$  NMR, 400 MHz,  $\text{DMSO-}d_6$

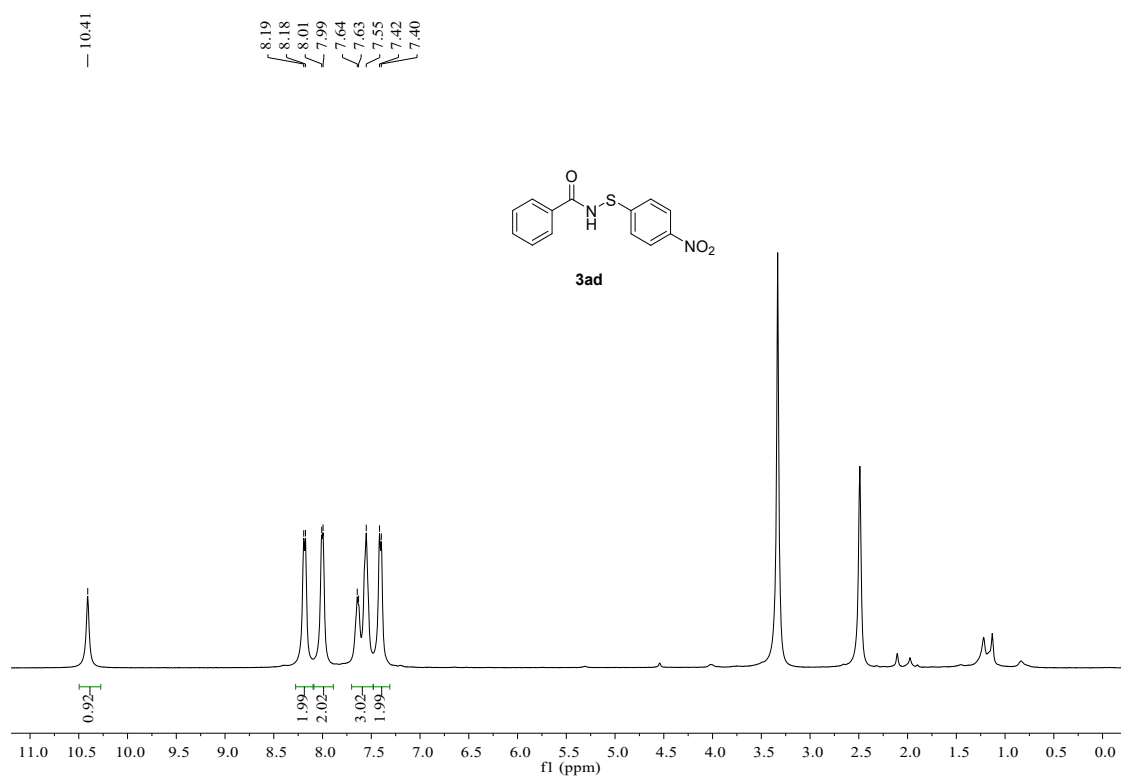

$^{13}\text{C}$  NMR, 100 MHz,  $\text{DMSO-}d_6$

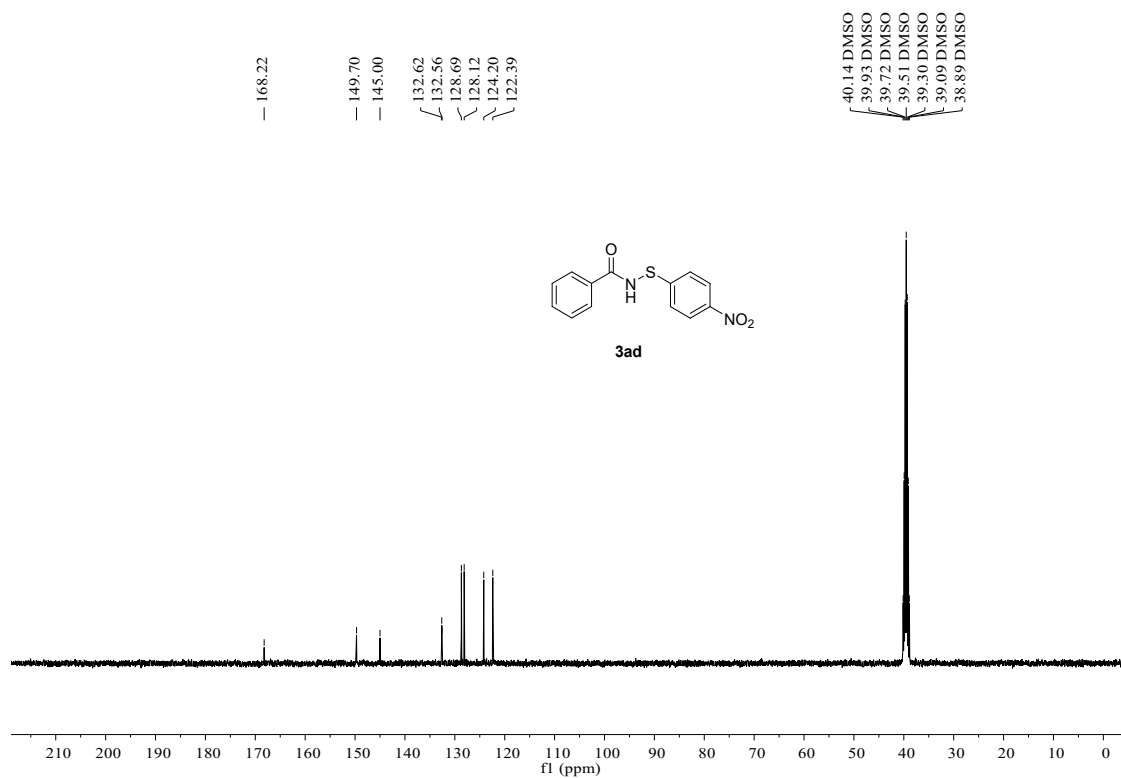

$^1\text{H}$  NMR, 400 MHz,  $\text{DMSO-}d_6$

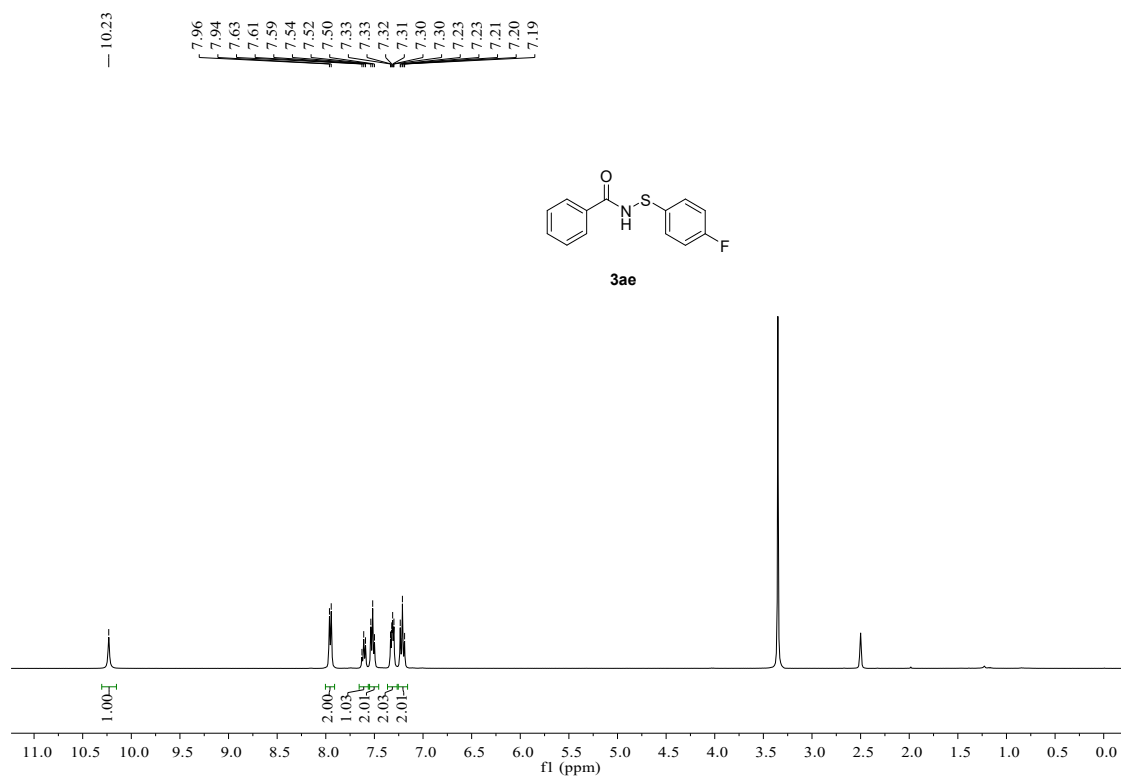

$^{13}\text{C}$  NMR, 100 MHz,  $\text{DMSO-}d_6$

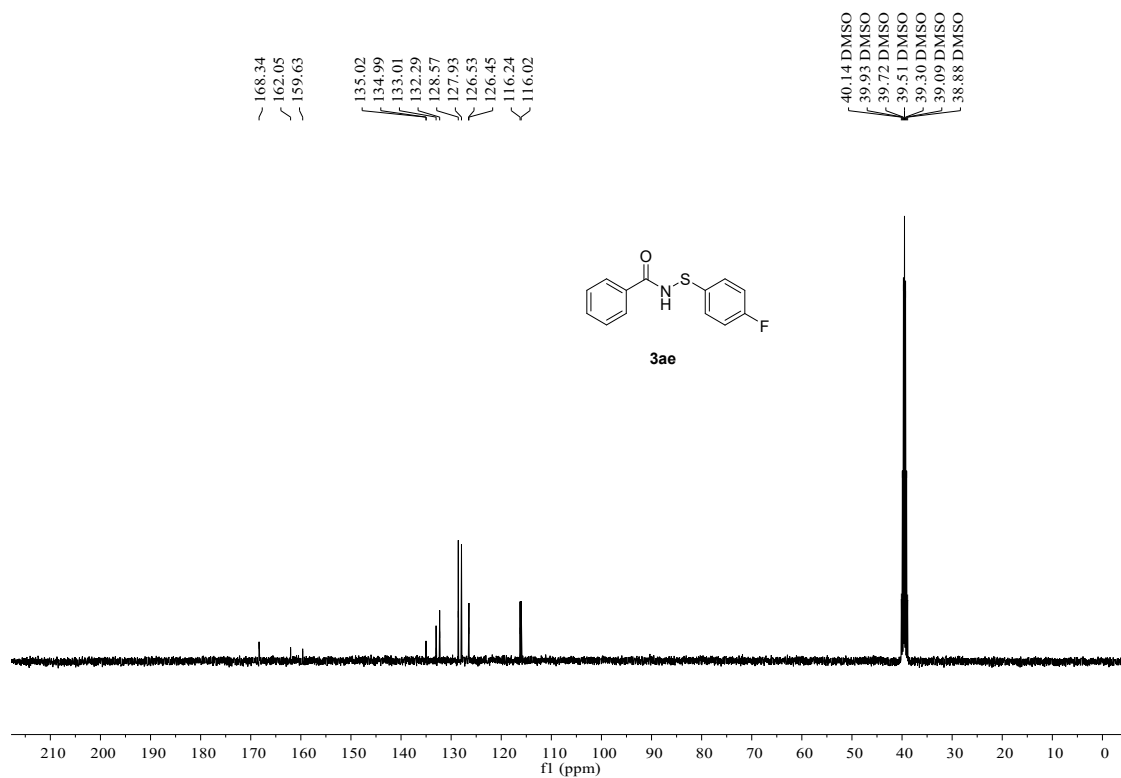

$^1\text{H}$  NMR, 400 MHz,  $\text{CDCl}_3$

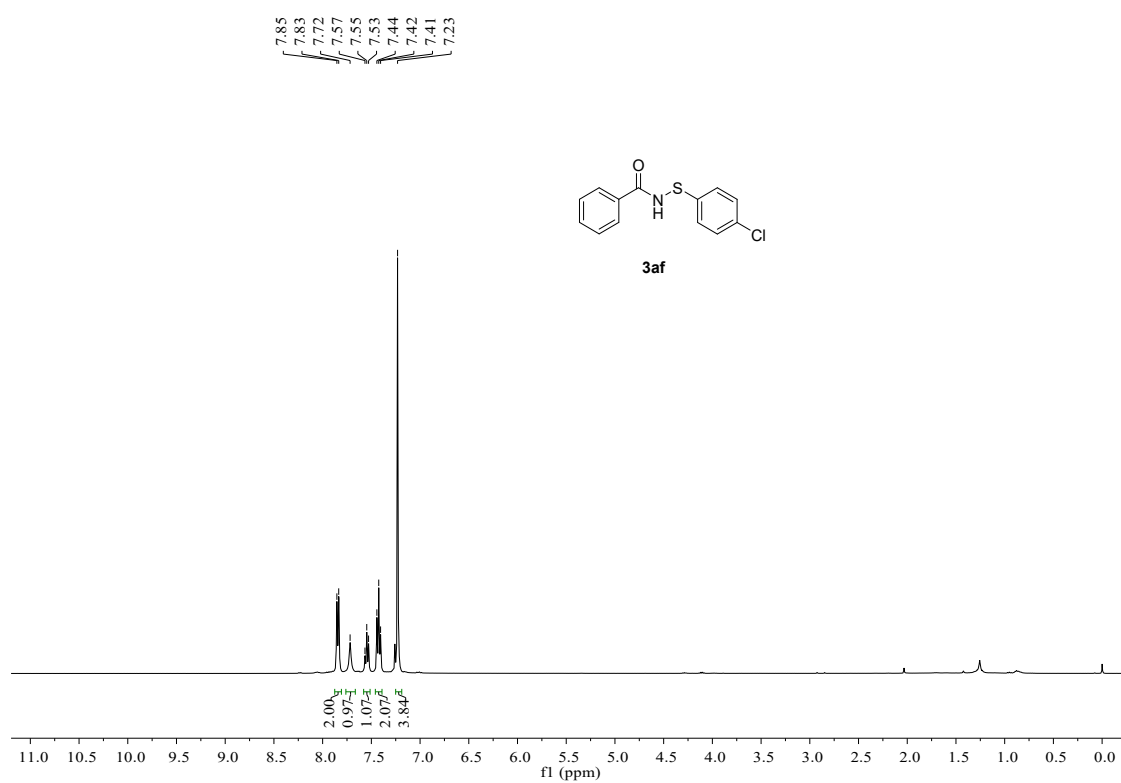

$^{13}\text{C}$  NMR, 100 MHz,  $\text{CDCl}_3$

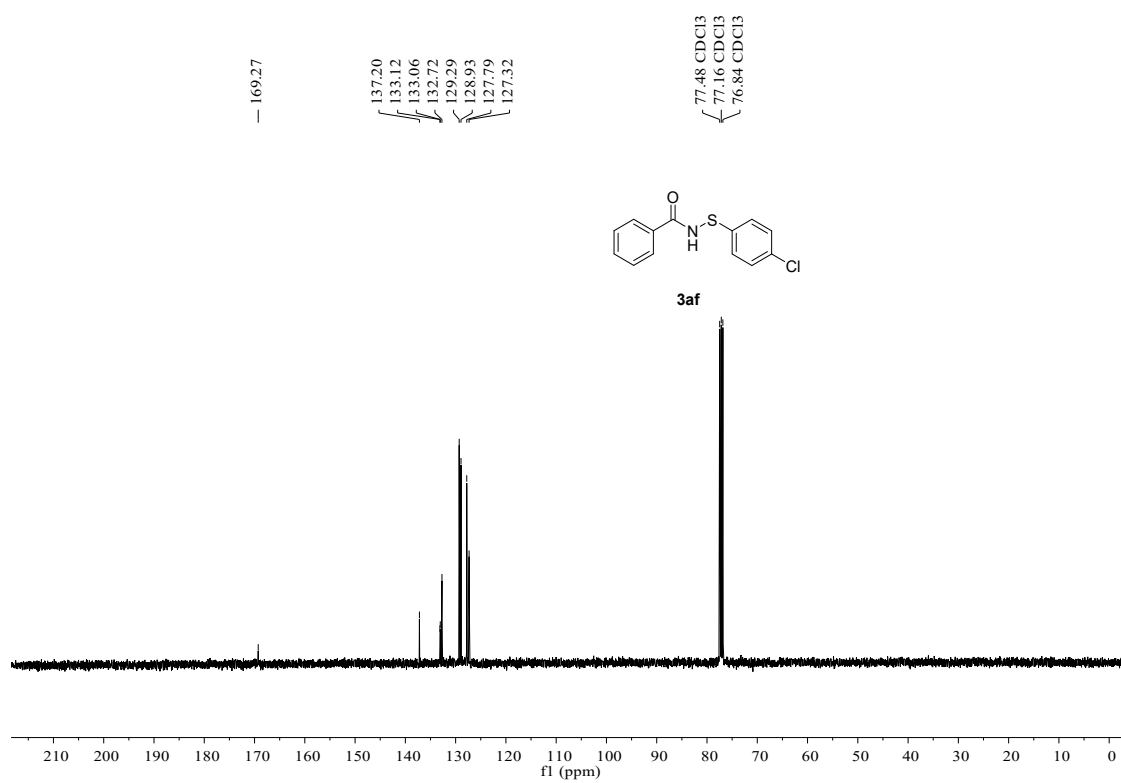

$^1\text{H}$  NMR, 400 MHz,  $\text{DMSO-}d_6$

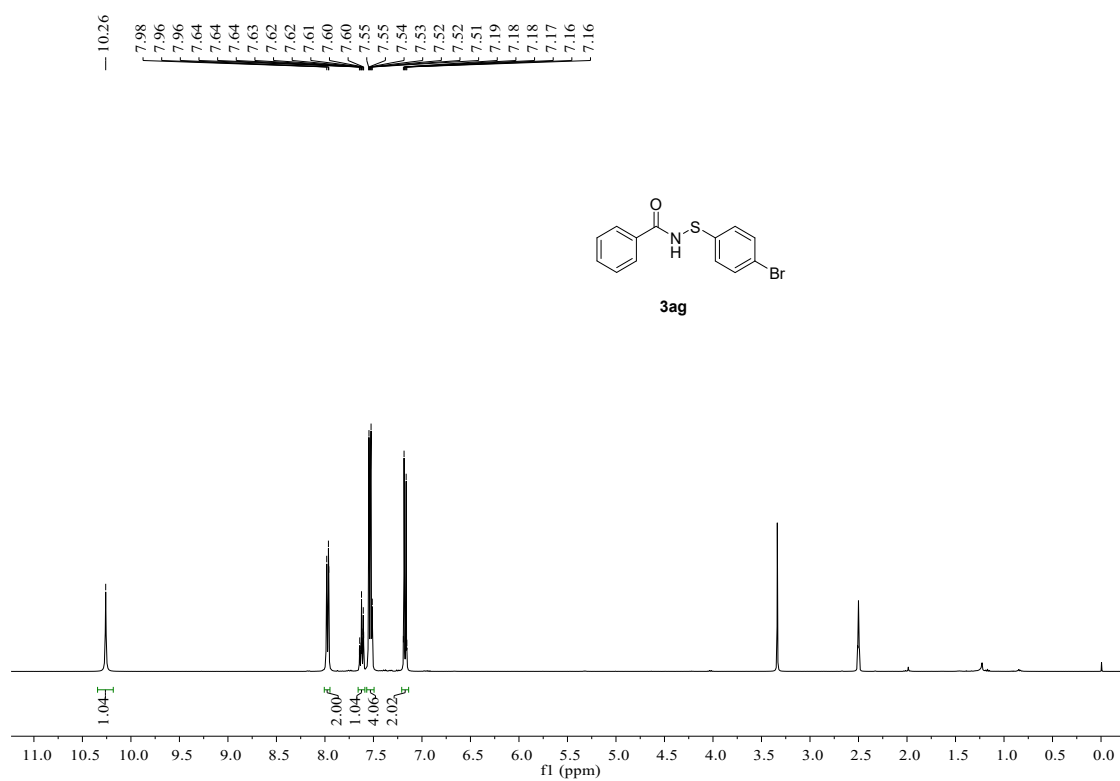

$^{13}\text{C}$  NMR, 100 MHz,  $\text{DMSO-}d_6$

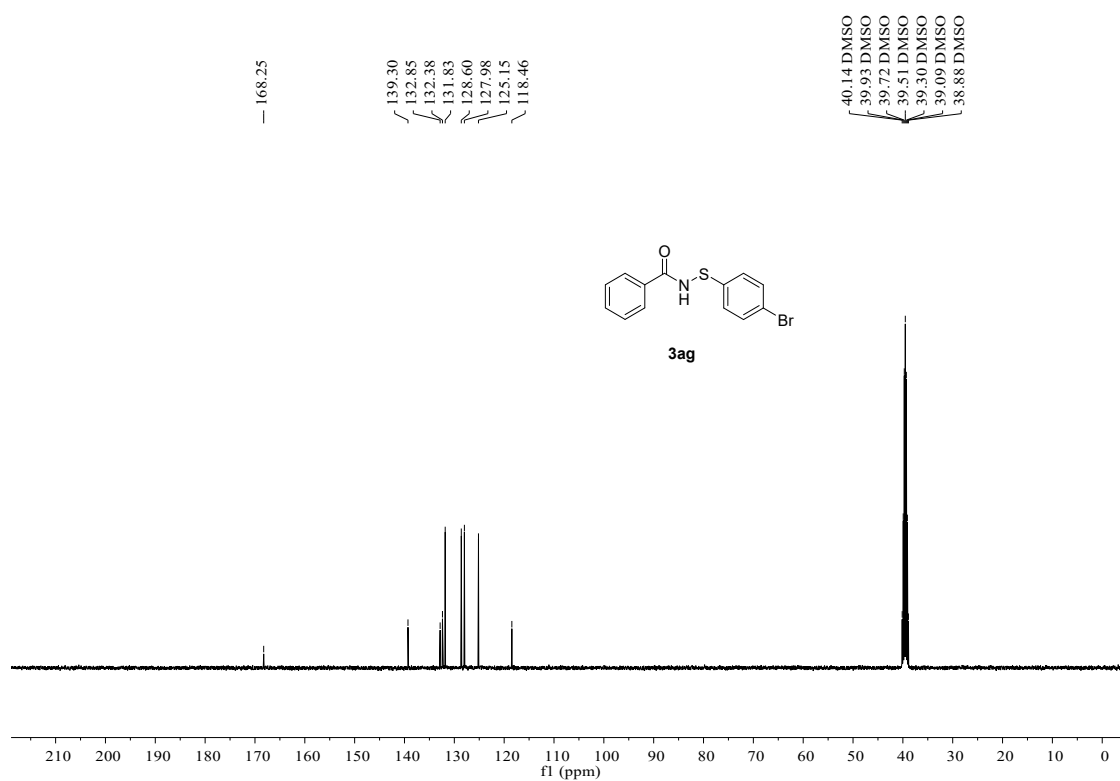

$^1\text{H}$  NMR, 400 MHz, Acetone- $d_6$

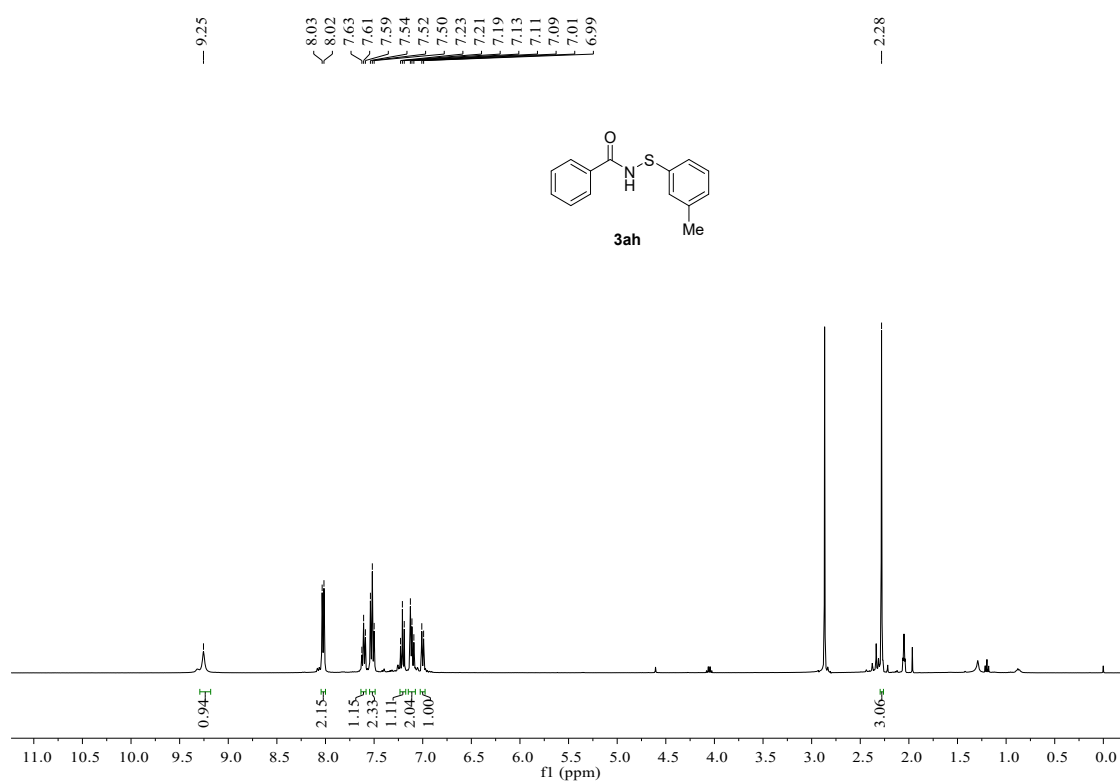

$^{13}\text{C}$  NMR, 100 MHz, Acetone- $d_6$

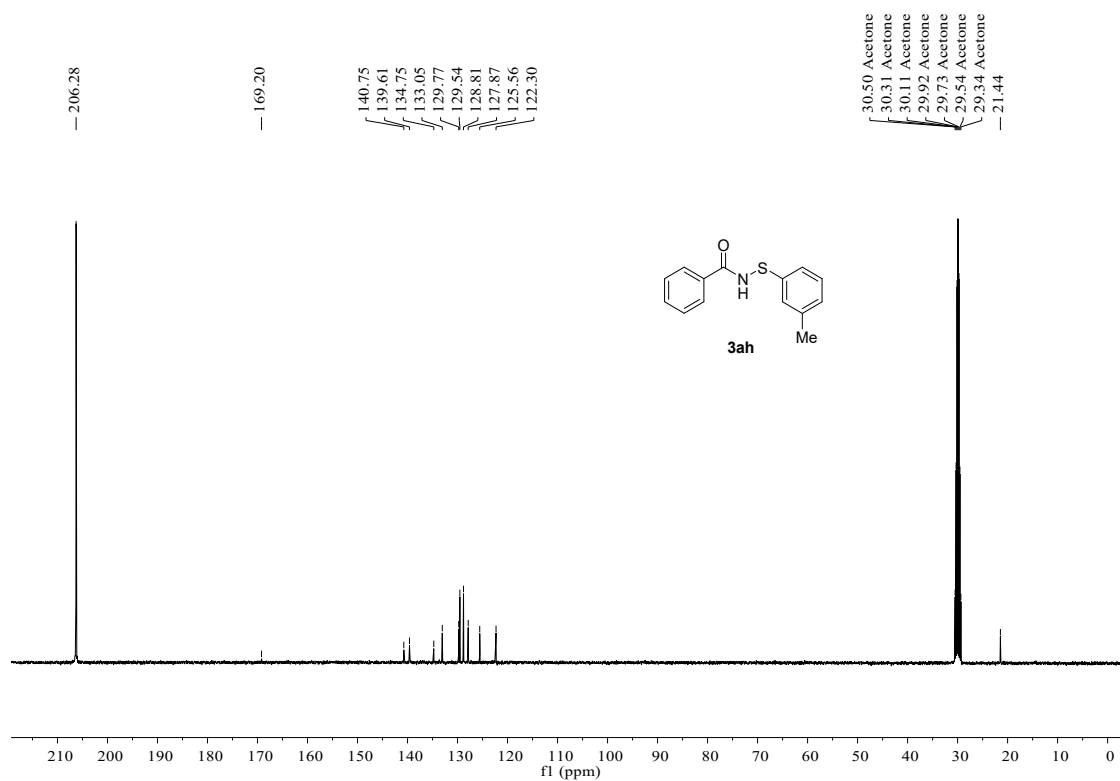

$^1\text{H}$  NMR, 400 MHz,  $\text{DMSO-}d_6$

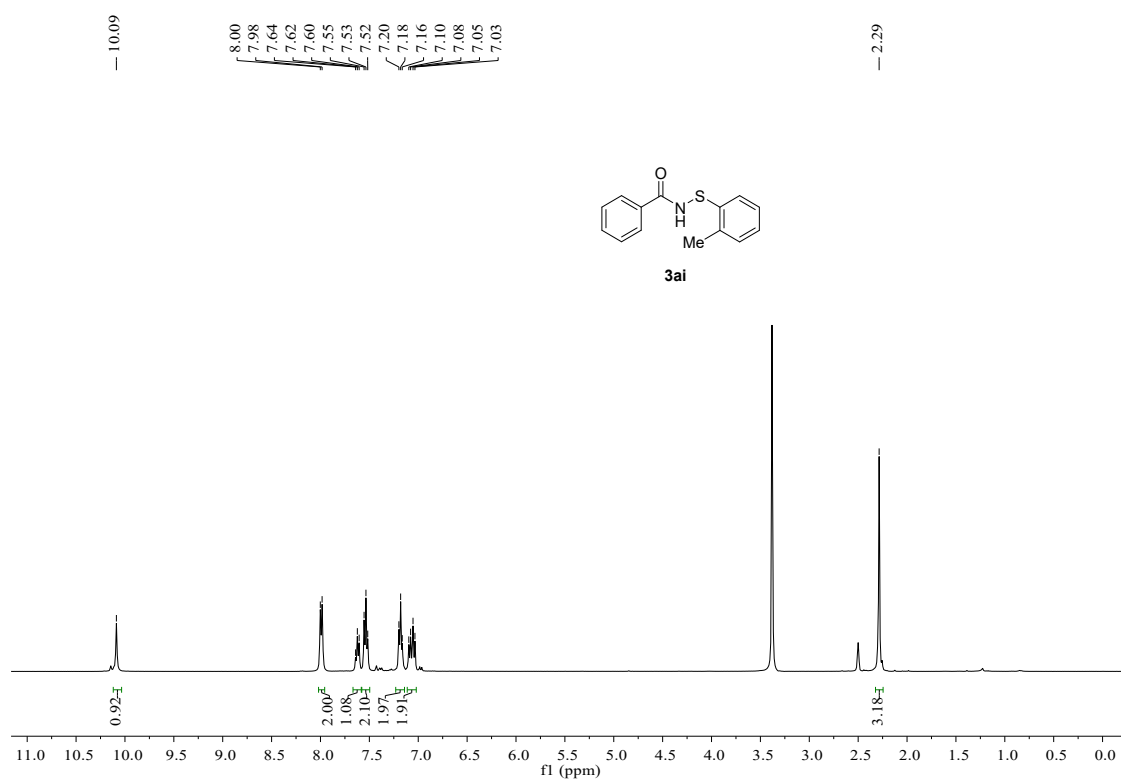

$^{13}\text{C}$  NMR, 100 MHz,  $\text{DMSO-}d_6$

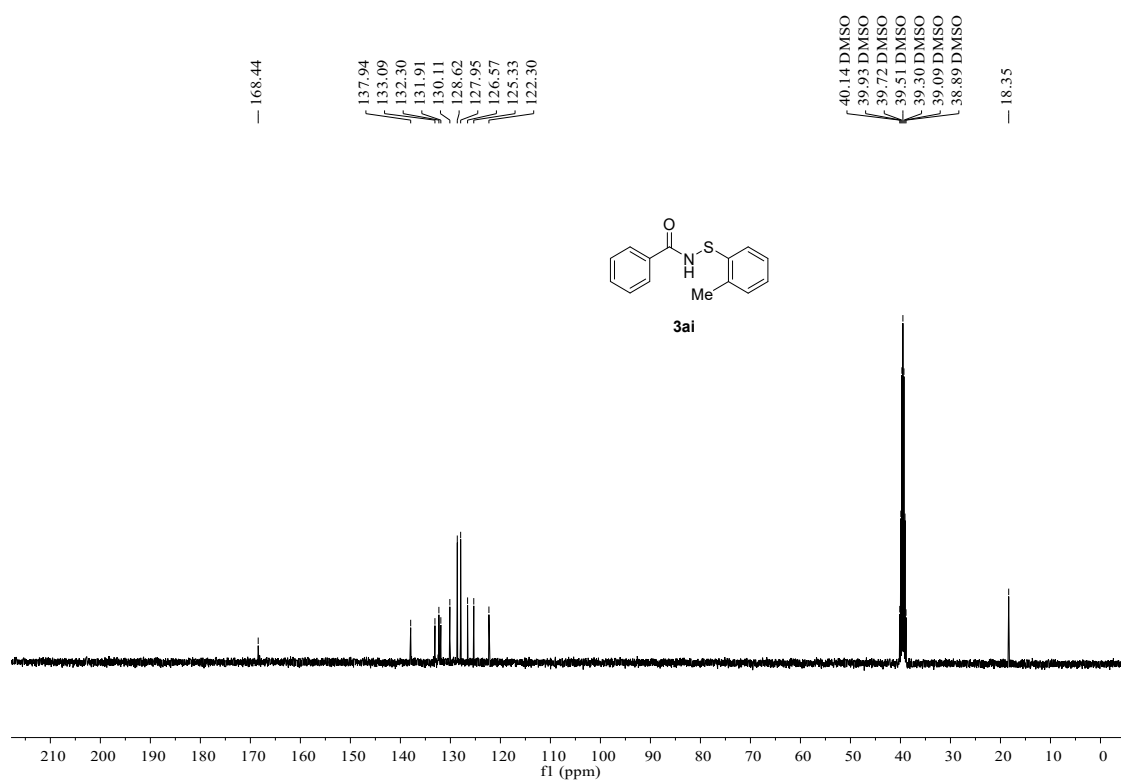

$^1\text{H}$  NMR, 400 MHz,  $\text{CDCl}_3$

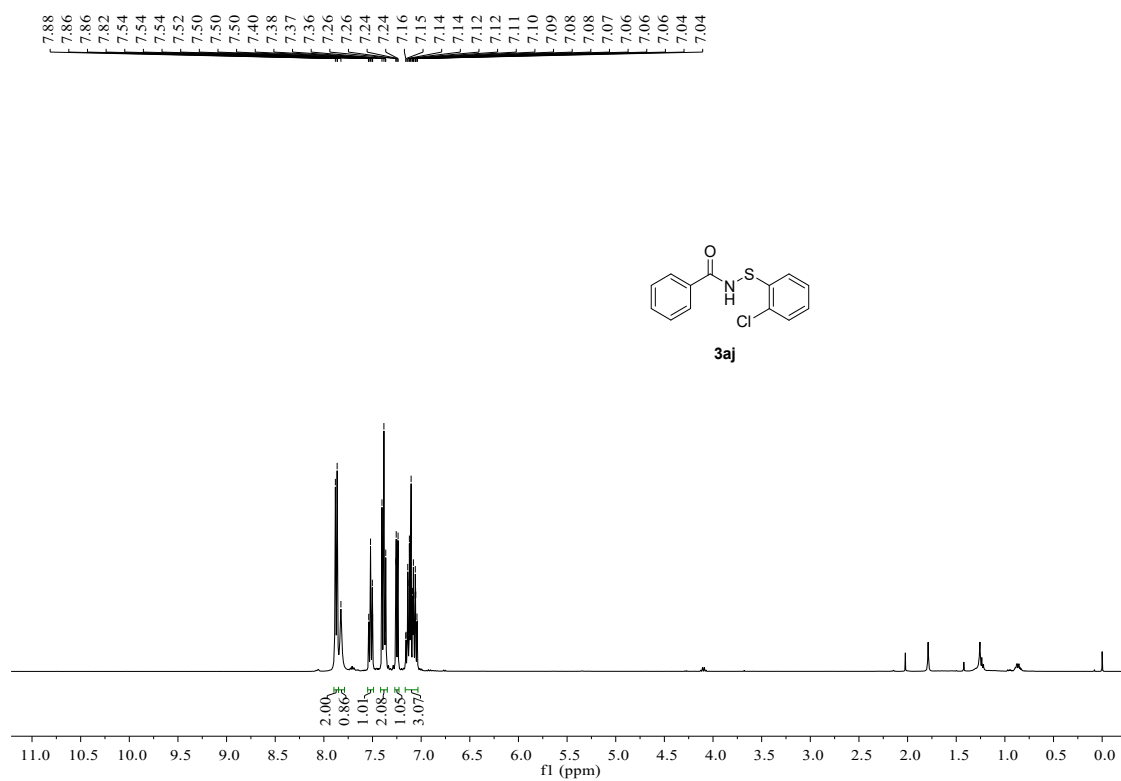

$^{13}\text{C}$  NMR, 100 MHz,  $\text{CDCl}_3$

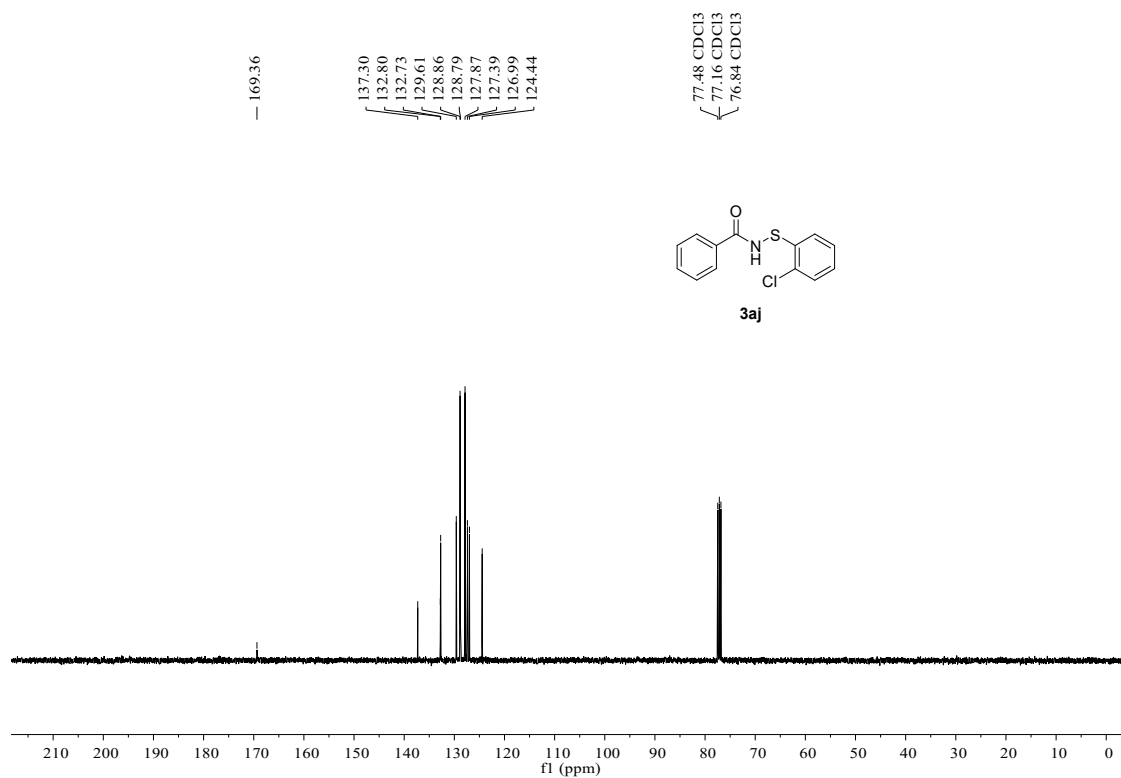



$^1\text{H}$  NMR, 400 MHz, Acetone- $d_6$

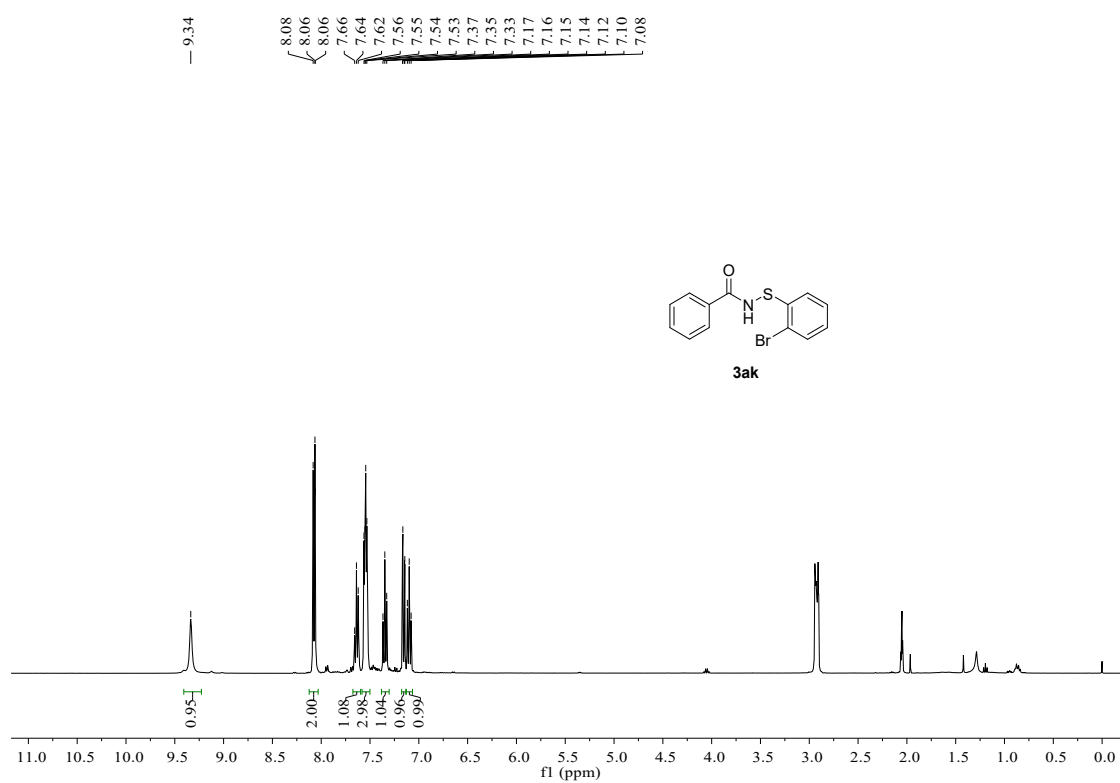

$^{13}\text{C}$  NMR, 100 MHz, Acetone- $d_6$

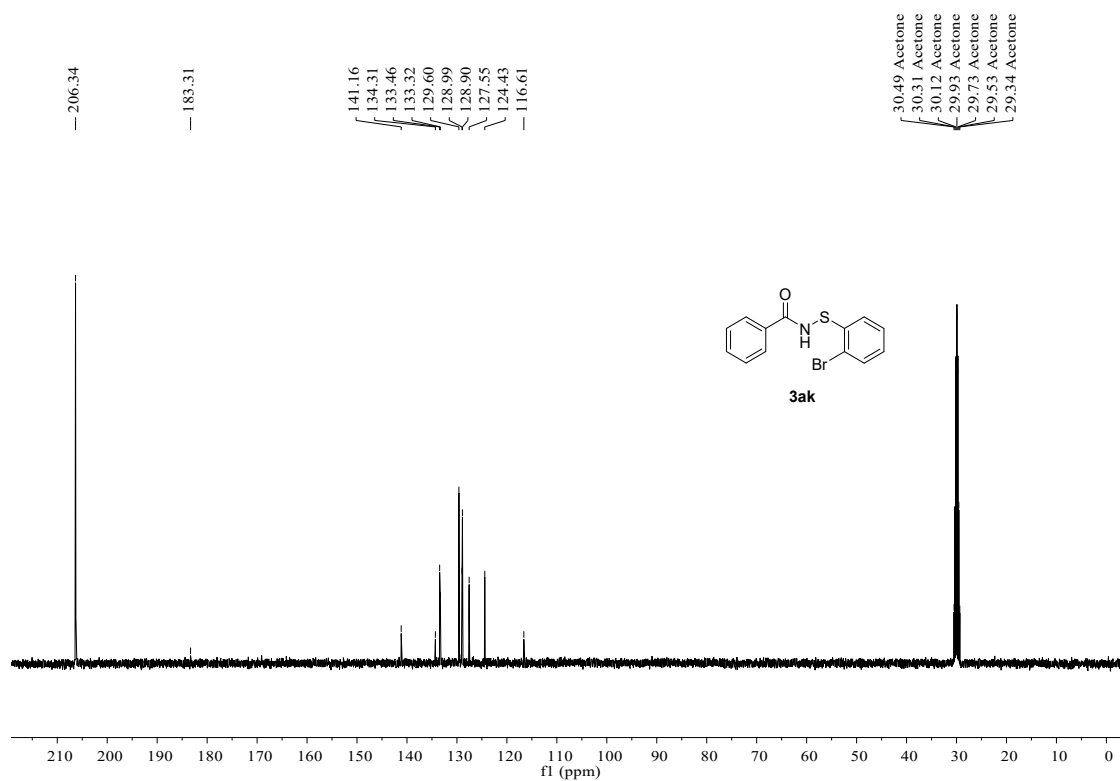

<sup>1</sup>H NMR, 400 MHz, DMSO-*d*<sub>6</sub>

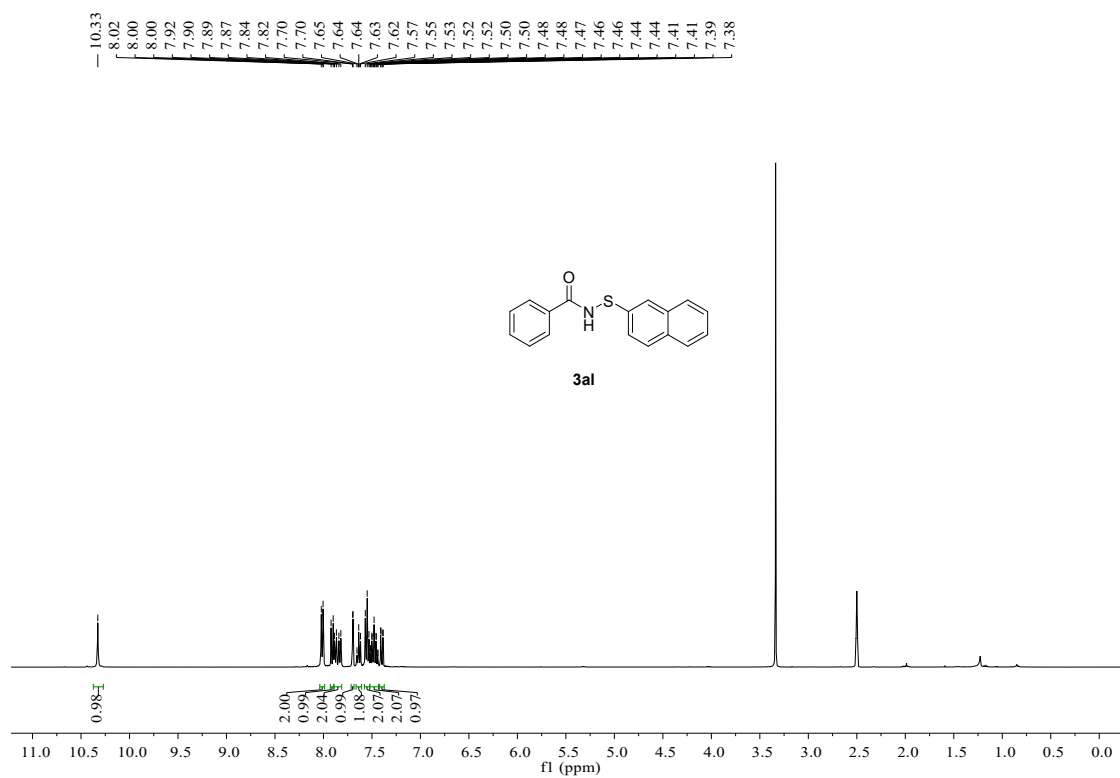

<sup>13</sup>C NMR, 100 MHz, DMSO-*d*<sub>6</sub>

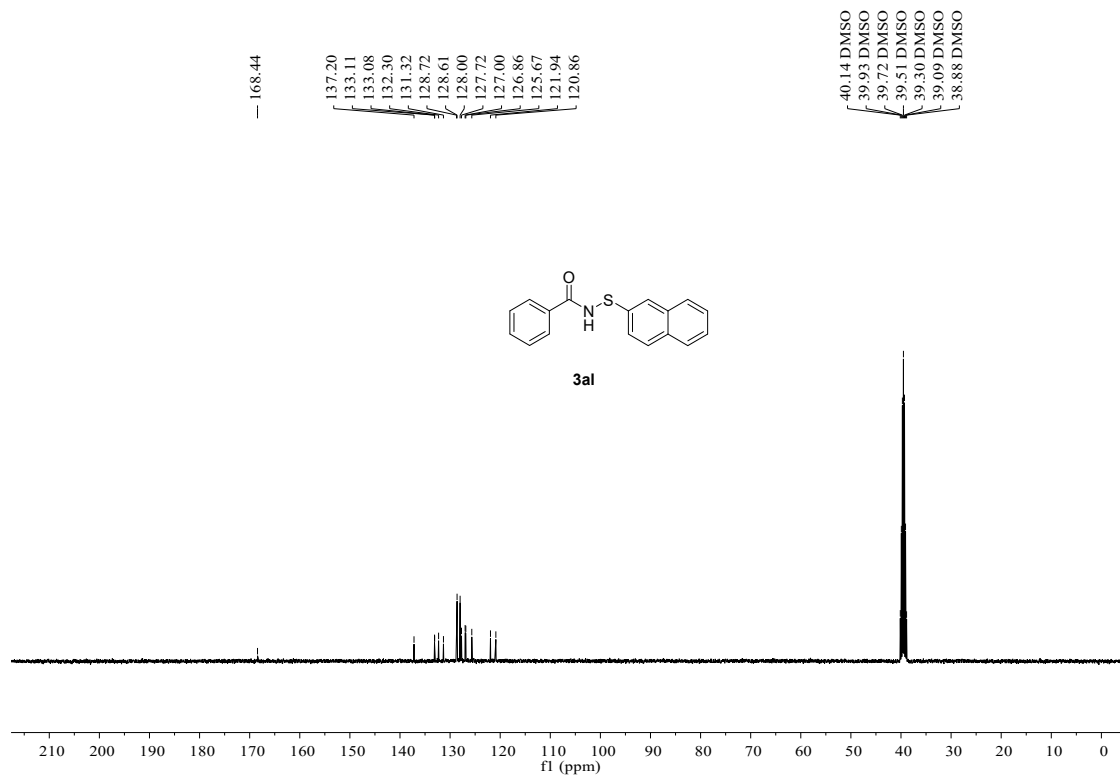

$^1\text{H}$  NMR, 400 MHz,  $\text{DMSO-}d_6$

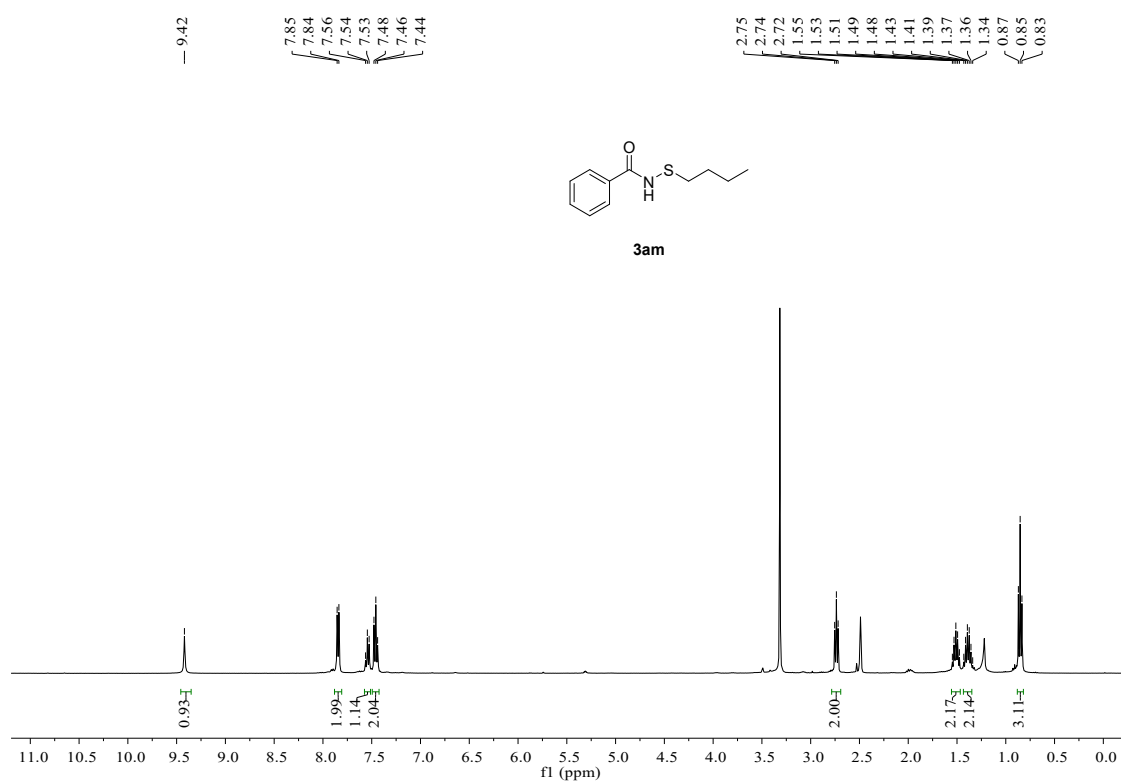

$^{13}\text{C}$  NMR, 100 MHz,  $\text{DMSO-}d_6$

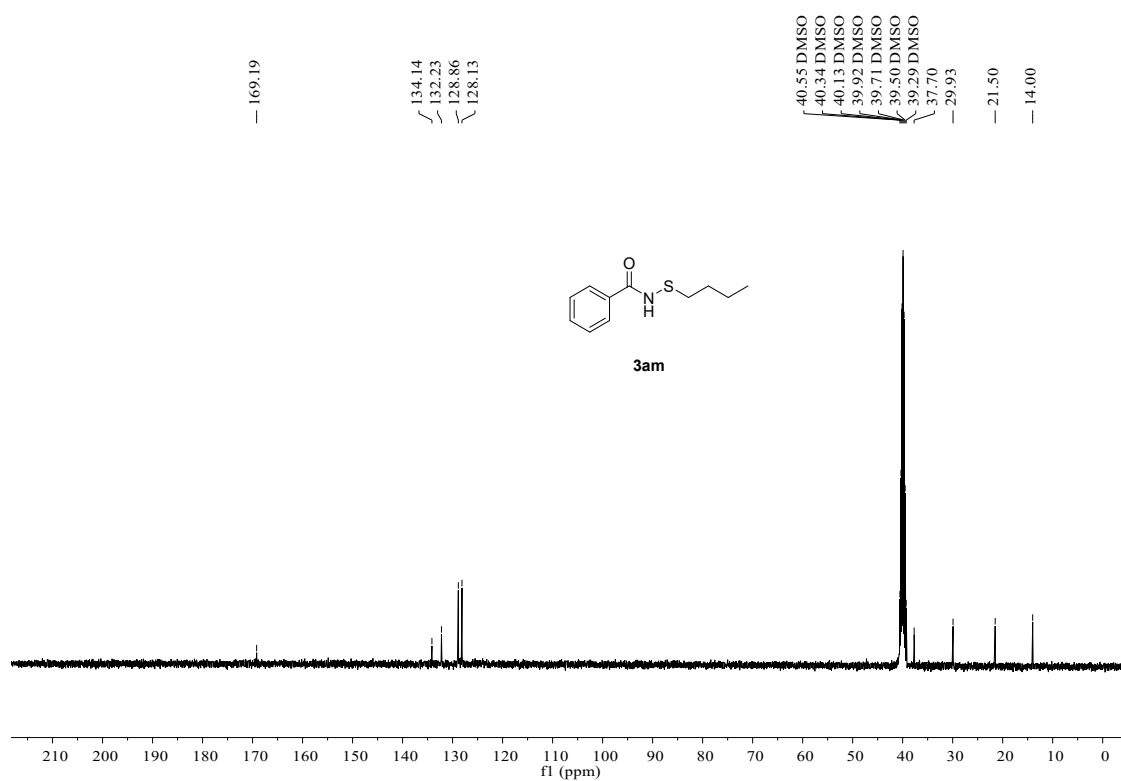

$^1\text{H}$  NMR, 400 MHz, Acetone- $d_6$

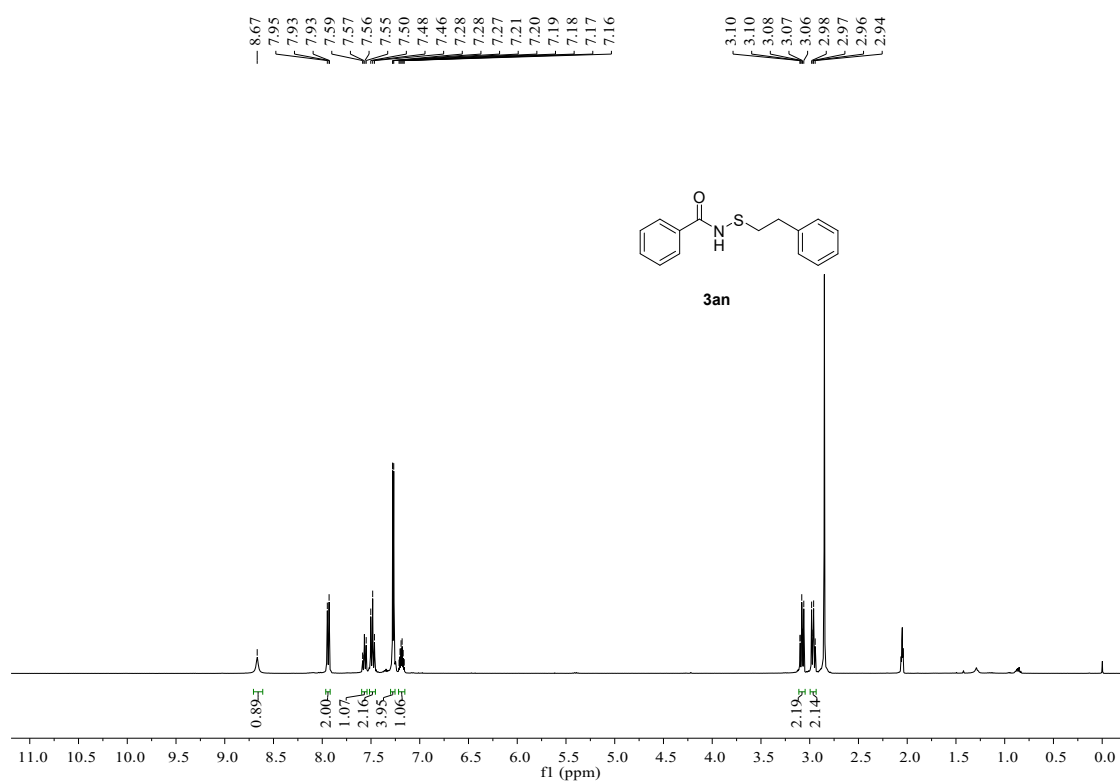

$^{13}\text{C}$  NMR, 100 MHz, Acetone- $d_6$

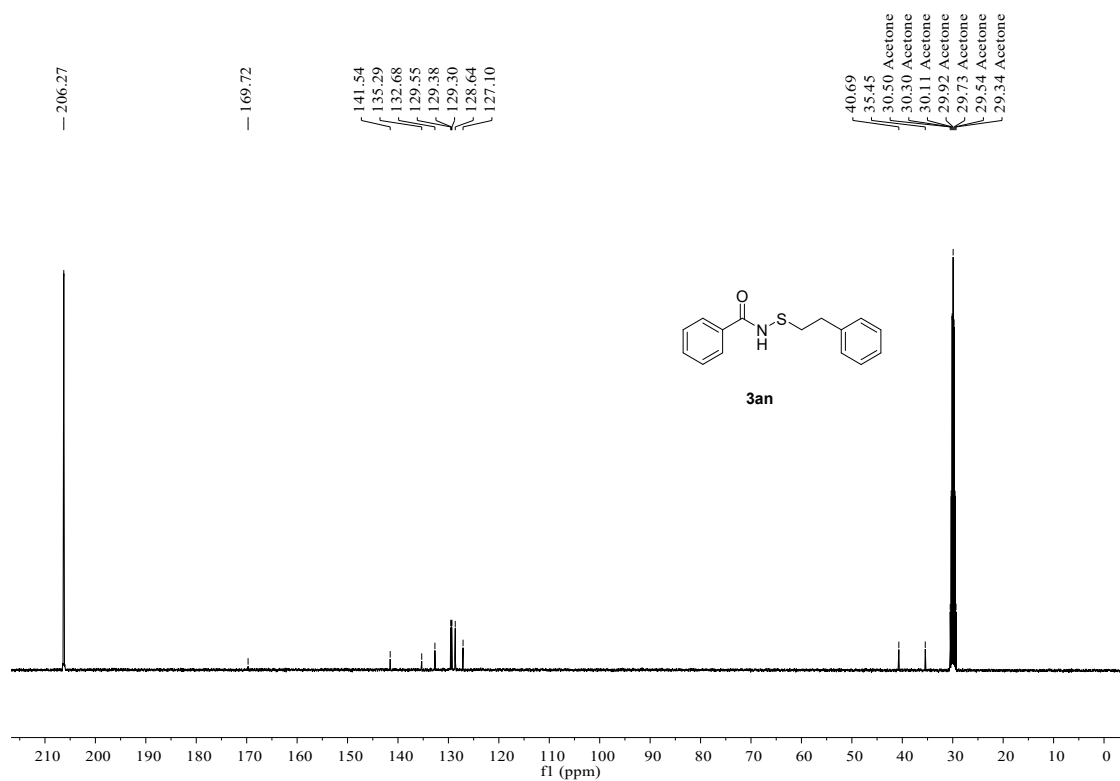

<sup>1</sup>H NMR, 400 MHz, Acetone-d<sub>6</sub>

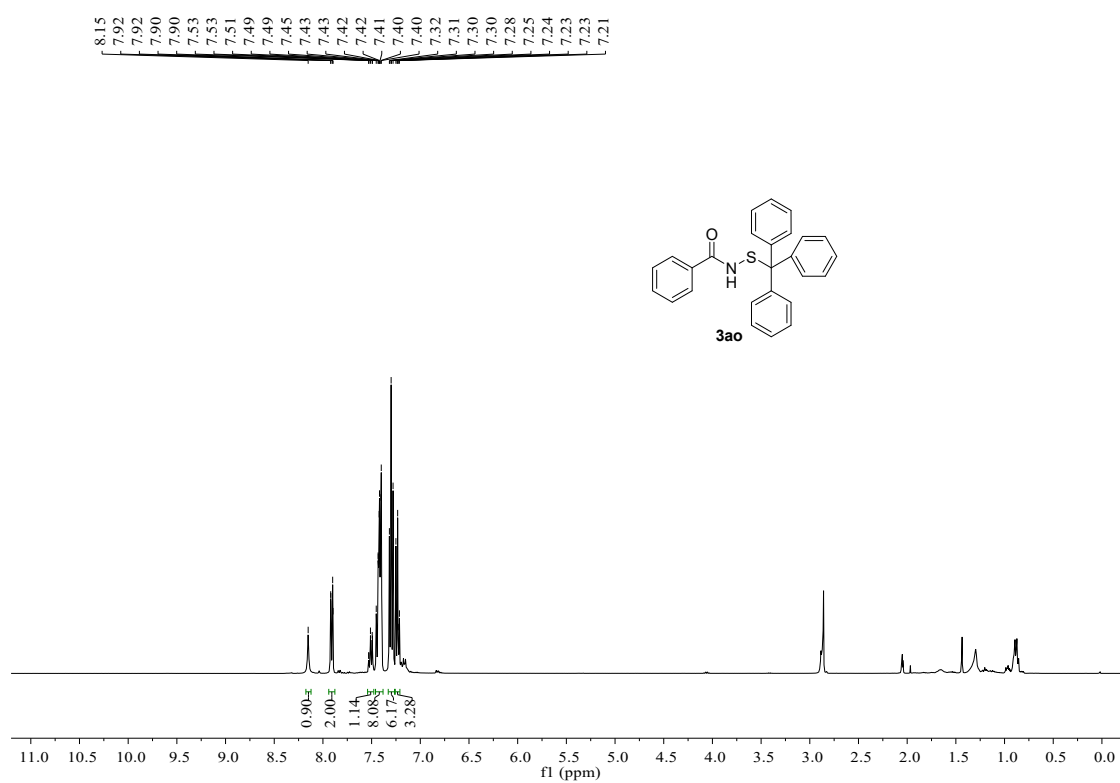

<sup>13</sup>C NMR, 100 MHz, Acetone-d<sub>6</sub>

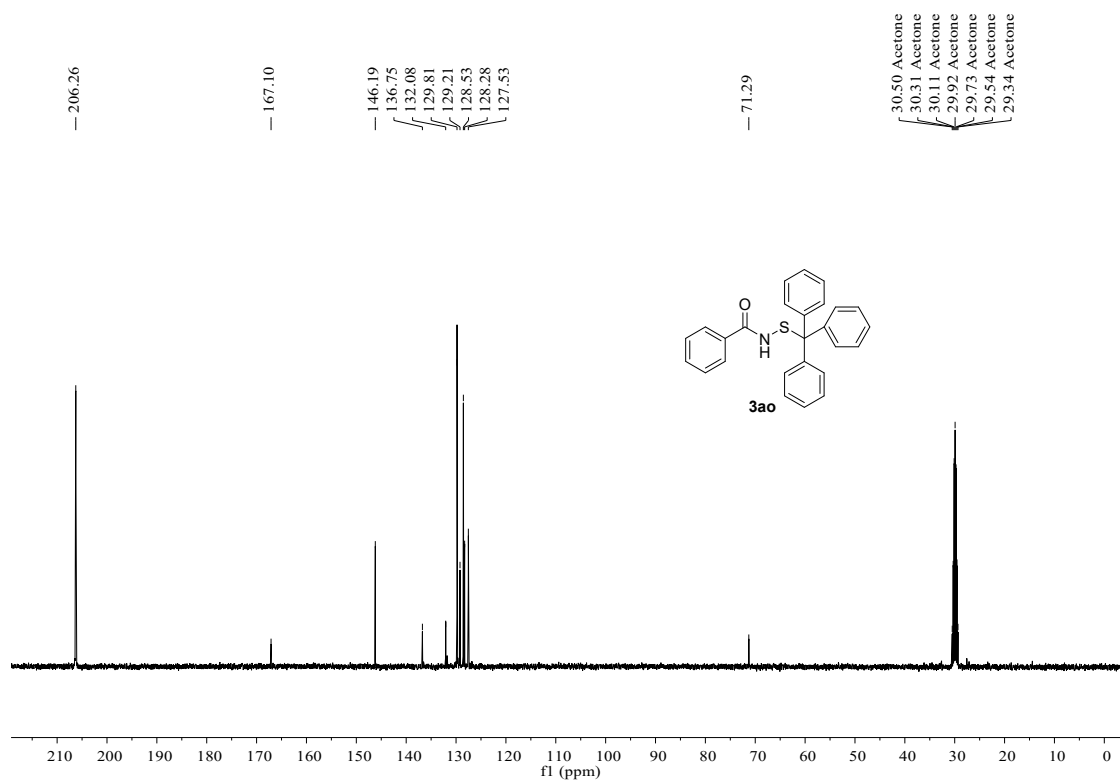

$^1\text{H}$  NMR, 400 MHz,  $\text{CDCl}_3$

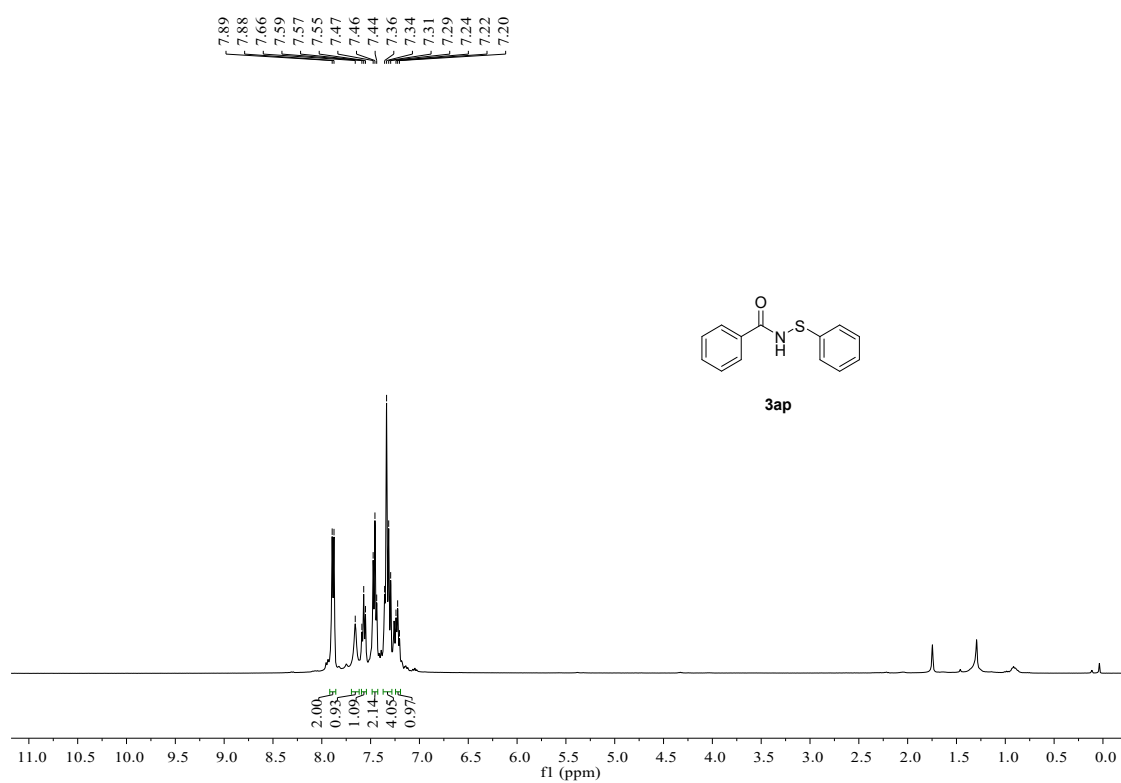

$^{13}\text{C}$  NMR, 100 MHz,  $\text{CDCl}_3$

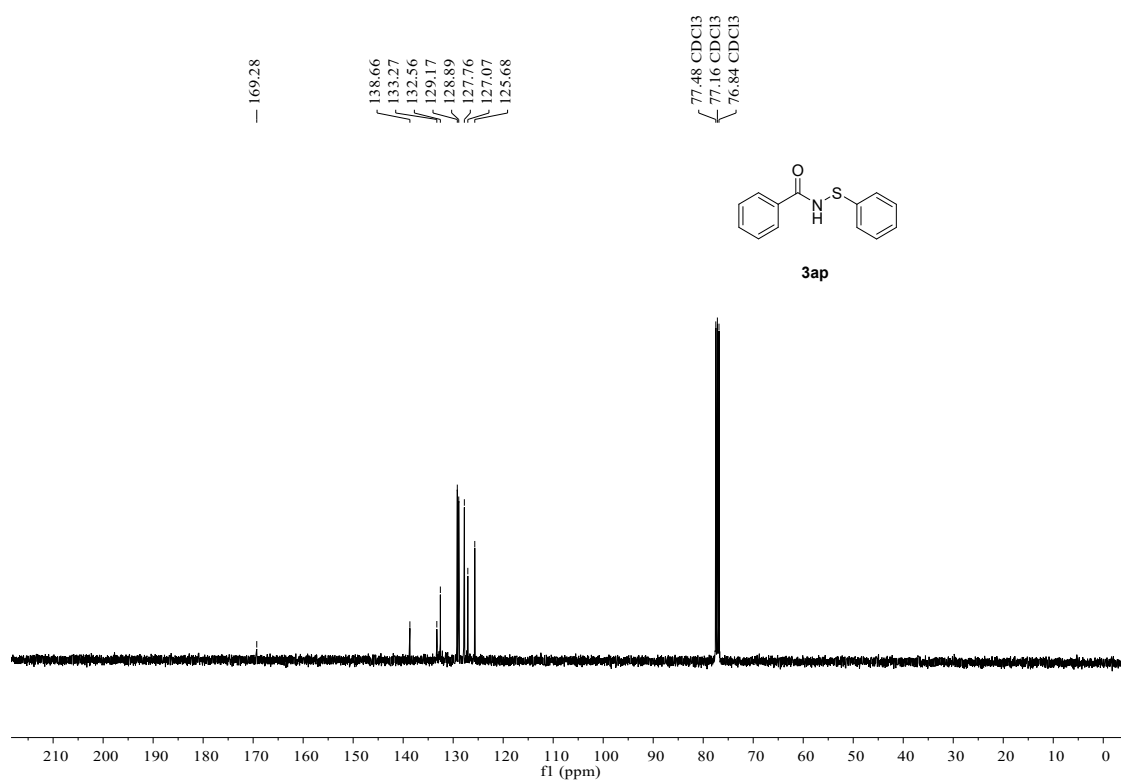

Supplement: d3gc02479b1.pdf [file d3gc02479b1.pdf]
